# Supplementary material
Source: PubMed Central journal article supplement (PMC6813578)
Supplement: jamapsychiatry-77-25-s001.pdf [file jamapsychiatry-77-25-s001.pdf]

## Supplementary Online Content

Gradus JL, Rosellini AJ, Horváth-Puhó E, et al. Prediction of sex-specific suicide risk using machine learning and single-payer health care registry data from Denmark. *JAMA Psychiatry*. Published online October 23, 2019.  
doi:10.1001/jamapsychiatry.2019.2905

### **eTable.** Variables Included in the Analyses

This supplementary material has been provided by the authors to give readers additional information about their work.

**eTable. Variables included in the analyses.**

| <b>Code</b> | <b>Variable label</b>                                           | <b>Retained</b> |
|-------------|-----------------------------------------------------------------|-----------------|
| A00_A09_6m  | Intestinal infectious diseases_6m                               | Yes             |
| A00_A09_12m | Intestinal infectious diseases_12m                              | Yes             |
| A00_A09_24m | Intestinal infectious diseases_24m                              | Yes             |
| A00_A09_48m | Intestinal infectious diseases_48m                              | Yes             |
| A15_A19_6m  | Tuberculosis_6m                                                 | No              |
| A15_A19_12m | Tuberculosis_12m                                                | No              |
| A15_A19_24m | Tuberculosis_24m                                                | No              |
| A15_A19_48m | Tuberculosis_48m                                                | Yes             |
| A20_A28_6m  | Certain zoonotic bacterial diseases_6m                          | No              |
| A20_A28_12m | Certain zoonotic bacterial diseases_12m                         | No              |
| A20_A28_24m | Certain zoonotic bacterial diseases_24m                         | No              |
| A20_A28_48m | Certain zoonotic bacterial diseases_48m                         | No              |
| A30_A49_6m  | Other bacterial diseases_6m                                     | Yes             |
| A30_A49_12m | Other bacterial diseases_12m                                    | Yes             |
| A30_A49_24m | Other bacterial diseases_24m                                    | Yes             |
| A30_A49_48m | Other bacterial diseases_48m                                    | Yes             |
| A50_A64_6m  | Infections with a predominantly sexual mode of transmission_6m  | No              |
| A50_A64_12m | Infections with a predominantly sexual mode of transmission_12m | Yes             |
| A50_A64_24m | Infections with a predominantly sexual mode of transmission_24m | Yes             |
| A50_A64_48m | Infections with a predominantly sexual mode of transmission_48m | Yes             |
| A65_A69_6m  | Other spirochetal diseases_6m                                   | No              |
| A65_A69_12m | Other spirochetal diseases_12m                                  | No              |
| A65_A69_24m | Other spirochetal diseases_24m                                  | No              |
| A65_A69_48m | Other spirochetal diseases_48m                                  | No              |
| A70_A74_6m  | Other diseases caused by chlamydiae_6m                          | No              |

|             |                                                                        |     |
|-------------|------------------------------------------------------------------------|-----|
| A70_A74_12m | Other diseases caused by chlamydiae_12m                                | No  |
| A70_A74_24m | Other diseases caused by chlamydiae_24m                                | No  |
| A70_A74_48m | Other diseases caused by chlamydiae_48m                                | No  |
| A75_A79_6m  | Rickettsioses_6m                                                       | No  |
| A75_A79_12m | Rickettsioses_12m                                                      | No  |
| A75_A79_24m | Rickettsioses_24m                                                      | No  |
| A75_A79_48m | Rickettsioses_48m                                                      | No  |
| A80_A89_6m  | Viral and prion infections of the central nervous system_6m            | No  |
| A80_A89_12m | Viral and prion infections of the central nervous system_12m           | No  |
| A80_A89_24m | Viral and prion infections of the central nervous system_24m           | No  |
| A80_A89_48m | Viral and prion infections of the central nervous system_48m           | No  |
| A90_A99_6m  | Arthropod-borne viral fevers and viral hemorrhagic fevers_6m           | No  |
| A90_A99_12m | Arthropod-borne viral fevers and viral hemorrhagic fevers_12m          | No  |
| A90_A99_24m | Arthropod-borne viral fevers and viral hemorrhagic fevers_24m          | No  |
| A90_A99_48m | Arthropod-borne viral fevers and viral hemorrhagic fevers_48m          | No  |
| B00_B09_6m  | Viral infections characterized by skin and mucous membrane lesions_6m  | No  |
| B00_B09_12m | Viral infections characterized by skin and mucous membrane lesions_12m | Yes |
| B00_B09_24m | Viral infections characterized by skin and mucous membrane lesions_24m | Yes |
| B00_B09_48m | Viral infections characterized by skin and mucous membrane lesions_48m | Yes |
| B10_B10_6m  | Other human herpesviruses_6m                                           | No  |
| B10_B10_12m | Other human herpesviruses_12m                                          | No  |
| B10_B10_24m | Other human herpesviruses_24m                                          | No  |
| B10_B10_48m | Other human herpesviruses_48m                                          | No  |
| B15_B19_6m  | Viral hepatitis_6m                                                     | Yes |
| B15_B19_12m | Viral hepatitis_12m                                                    | Yes |
| B15_B19_24m | Viral hepatitis_24m                                                    | Yes |

|             |                                                   |     |
|-------------|---------------------------------------------------|-----|
| B15_B19_48m | Viral hepatitis_48m                               | Yes |
| B20_B20_6m  | Human immunodeficiency virus [HIV] disease_6m     | No  |
| B20_B20_12m | Human immunodeficiency virus [HIV] disease_12m    | No  |
| B20_B20_24m | Human immunodeficiency virus [HIV] disease_24m    | Yes |
| B20_B20_48m | Human immunodeficiency virus [HIV] disease_48m    | Yes |
| B25_B34_6m  | Other viral diseases_6m                           | No  |
| B25_B34_12m | Other viral diseases_12m                          | Yes |
| B25_B34_24m | Other viral diseases_24m                          | Yes |
| B25_B34_48m | Other viral diseases_48m                          | Yes |
| B35_B49_6m  | Mycoses_6m                                        | Yes |
| B35_B49_12m | Mycoses_12m                                       | Yes |
| B35_B49_24m | Mycoses_24m                                       | Yes |
| B35_B49_48m | Mycoses_48m                                       | Yes |
| B50_B64_6m  | Protozoal diseases_6m                             | No  |
| B50_B64_12m | Protozoal diseases_12m                            | No  |
| B50_B64_24m | Protozoal diseases_24m                            | No  |
| B50_B64_48m | Protozoal diseases_48m                            | No  |
| B65_B83_6m  | Helminthiases_6m                                  | No  |
| B65_B83_12m | Helminthiases_12m                                 | No  |
| B65_B83_24m | Helminthiases_24m                                 | No  |
| B65_B83_48m | Helminthiases_48m                                 | No  |
| B85_B89_6m  | Pediculosis, acariasis and other infestations_6m  | No  |
| B85_B89_12m | Pediculosis, acariasis and other infestations_12m | No  |
| B85_B89_24m | Pediculosis, acariasis and other infestations_24m | No  |
| B85_B89_48m | Pediculosis, acariasis and other infestations_48m | No  |
| B90_B94_6m  | Sequelae of infectious and parasitic diseases_6m  | No  |
| B90_B94_12m | Sequelae of infectious and parasitic diseases_12m | No  |
| B90_B94_24m | Sequelae of infectious and parasitic diseases_24m | No  |

|             |                                                                 |     |
|-------------|-----------------------------------------------------------------|-----|
| B90_B94_48m | Sequelae of infectious and parasitic diseases_48m               | No  |
| B95_B97_6m  | Bacterial and viral infectious agents_6m                        | No  |
| B95_B97_12m | Bacterial and viral infectious agents_12m                       | No  |
| B95_B97_24m | Bacterial and viral infectious agents_24m                       | No  |
| B95_B97_48m | Bacterial and viral infectious agents_48m                       | No  |
| B99_B99_6m  | Other infectious diseases_6m                                    | No  |
| B99_B99_12m | Other infectious diseases_12m                                   | No  |
| B99_B99_24m | Other infectious diseases_24m                                   | No  |
| B99_B99_48m | Other infectious diseases_48m                                   | No  |
| C00_C14_6m  | Malignant neoplasms of lip, oral cavity and pharynx_6m          | Yes |
| C00_C14_12m | Malignant neoplasms of lip, oral cavity and pharynx_12m         | Yes |
| C00_C14_24m | Malignant neoplasms of lip, oral cavity and pharynx_24m         | Yes |
| C00_C14_48m | Malignant neoplasms of lip, oral cavity and pharynx_48m         | Yes |
| C7A_C7A_6m  | Malignant neuroendocrine tumors_6m                              | No  |
| C7A_C7A_12m | Malignant neuroendocrine tumors_12m                             | No  |
| C7A_C7A_24m | Malignant neuroendocrine tumors_24m                             | No  |
| C7A_C7A_48m | Malignant neuroendocrine tumors_48m                             | No  |
| C7B_C7B_6m  | Secondary neuroendocrine tumors_6m                              | No  |
| C7B_C7B_12m | Secondary neuroendocrine tumors_12m                             | No  |
| C7B_C7B_24m | Secondary neuroendocrine tumors_24m                             | No  |
| C7B_C7B_48m | Secondary neuroendocrine tumors_48m                             | No  |
| C15_C26_6m  | Malignant neoplasms of digestive organs_6m                      | Yes |
| C15_C26_12m | Malignant neoplasms of digestive organs_12m                     | Yes |
| C15_C26_24m | Malignant neoplasms of digestive organs_24m                     | Yes |
| C15_C26_48m | Malignant neoplasms of digestive organs_48m                     | Yes |
| C30_C39_6m  | Malignant neoplasms of respiratory and intrathoracic organs_6m  | Yes |
| C30_C39_12m | Malignant neoplasms of respiratory and intrathoracic organs_12m | Yes |
| C30_C39_24m | Malignant neoplasms of respiratory and intrathoracic organs_24m | Yes |

|             |                                                                 |     |
|-------------|-----------------------------------------------------------------|-----|
| C30_C39_48m | Malignant neoplasms of respiratory and intrathoracic organs_48m | Yes |
| C40_C41_6m  | Malignant neoplasms of bone and articular cartilage_6m          | No  |
| C40_C41_12m | Malignant neoplasms of bone and articular cartilage_12m         | No  |
| C40_C41_24m | Malignant neoplasms of bone and articular cartilage_24m         | No  |
| C40_C41_48m | Malignant neoplasms of bone and articular cartilage_48m         | No  |
| C43_C44_6m  | Melanoma and other malignant neoplasms of skin_6m               | Yes |
| C43_C44_12m | Melanoma and other malignant neoplasms of skin_12m              | Yes |
| C43_C44_24m | Melanoma and other malignant neoplasms of skin_24m              | Yes |
| C43_C44_48m | Melanoma and other malignant neoplasms of skin_48m              | Yes |
| C45_C49_6m  | Malignant neoplasms of mesothelial and soft tissue_6m           | No  |
| C45_C49_12m | Malignant neoplasms of mesothelial and soft tissue_12m          | No  |
| C45_C49_24m | Malignant neoplasms of mesothelial and soft tissue_24m          | No  |
| C45_C49_48m | Malignant neoplasms of mesothelial and soft tissue_48m          | Yes |
| C50_C50_6m  | Malignant neoplasms of breast_6m                                | Yes |
| C50_C50_12m | Malignant neoplasms of breast_12m                               | Yes |
| C50_C50_24m | Malignant neoplasms of breast_24m                               | Yes |
| C50_C50_48m | Malignant neoplasms of breast_48m                               | Yes |
| C51_C58_6m  | Malignant neoplasms of female genital organs_6m                 | Yes |
| C51_C58_12m | Malignant neoplasms of female genital organs_12m                | Yes |
| C51_C58_24m | Malignant neoplasms of female genital organs_24m                | Yes |
| C51_C58_48m | Malignant neoplasms of female genital organs_48m                | Yes |
| C60_C63_6m  | Malignant neoplasms of male genital organs_6m                   | Yes |
| C60_C63_12m | Malignant neoplasms of male genital organs_12m                  | Yes |
| C60_C63_24m | Malignant neoplasms of male genital organs_24m                  | Yes |
| C60_C63_48m | Malignant neoplasms of male genital organs_48m                  | Yes |
| C64_C68_6m  | Malignant neoplasms of urinary tract_6m                         | Yes |
| C64_C68_12m | Malignant neoplasms of urinary tract_12m                        | Yes |
| C64_C68_24m | Malignant neoplasms of urinary tract_24m                        | Yes |

|             |                                                                                 |     |
|-------------|---------------------------------------------------------------------------------|-----|
| C64_C68_48m | Malignant neoplasms of urinary tract_48m                                        | Yes |
| C69_C72_6m  | Malignant neoplasms of eye, brain and other parts of central nervous system_6m  | No  |
| C69_C72_12m | Malignant neoplasms of eye, brain and other parts of central nervous system_12m | Yes |
| C69_C72_24m | Malignant neoplasms of eye, brain and other parts of central nervous system_24m | Yes |
| C69_C72_48m | Malignant neoplasms of eye, brain and other parts of central nervous system_48m | Yes |
| C73_C75_6m  | Malignant neoplasms of thyroid and other endocrine glands_6m                    | No  |
| C73_C75_12m | Malignant neoplasms of thyroid and other endocrine glands_12m                   | No  |
| C73_C75_24m | Malignant neoplasms of thyroid and other endocrine glands_24m                   | No  |
| C73_C75_48m | Malignant neoplasms of thyroid and other endocrine glands_48m                   | No  |
| C76_C80_6m  | Malignant neoplasms of ill-defined, other secondary and unspecified sites_6m    | Yes |
| C76_C80_12m | Malignant neoplasms of ill-defined, other secondary and unspecified sites_12m   | Yes |
| C76_C80_24m | Malignant neoplasms of ill-defined, other secondary and unspecified sites_24m   | Yes |
| C76_C80_48m | Malignant neoplasms of ill-defined, other secondary and unspecified sites_48m   | Yes |
| C81_C96_6m  | Malignant neoplasms of lymphoid, hematopoietic and related tissue_6m            | Yes |
| C81_C96_12m | Malignant neoplasms of lymphoid, hematopoietic and related tissue_12m           | Yes |
| C81_C96_24m | Malignant neoplasms of lymphoid, hematopoietic and related tissue_24m           | Yes |
| C81_C96_48m | Malignant neoplasms of lymphoid, hematopoietic and related tissue_48m           | Yes |
| D00_D09_6m  | In situ neoplasms_6m                                                            | No  |
| D00_D09_12m | In situ neoplasms_12m                                                           | Yes |
| D00_D09_24m | In situ neoplasms_24m                                                           | Yes |
| D00_D09_48m | In situ neoplasms_48m                                                           | Yes |

|             |                                                                                      |     |
|-------------|--------------------------------------------------------------------------------------|-----|
| D3A_D3A_6m  | Benign neuroendocrine tumors_6m                                                      | No  |
| D3A_D3A_12m | Benign neuroendocrine tumors_12m                                                     | No  |
| D3A_D3A_24m | Benign neuroendocrine tumors_24m                                                     | No  |
| D3A_D3A_48m | Benign neuroendocrine tumors_48m                                                     | No  |
| D10_D36_6m  | Benign neoplasms, except benign neuroendocrine tumors_6m                             | Yes |
| D10_D36_12m | Benign neoplasms, except benign neuroendocrine tumors_12m                            | Yes |
| D10_D36_24m | Benign neoplasms, except benign neuroendocrine tumors_24m                            | Yes |
| D10_D36_48m | Benign neoplasms, except benign neuroendocrine tumors_48m                            | Yes |
| D37_D48_6m  | Neoplasms of uncertain behavior, polycythemia vera and myelodysplastic syndromes_6m  | Yes |
| D37_D48_12m | Neoplasms of uncertain behavior, polycythemia vera and myelodysplastic syndromes_12m | Yes |
| D37_D48_24m | Neoplasms of uncertain behavior, polycythemia vera and myelodysplastic syndromes_24m | Yes |
| D37_D48_48m | Neoplasms of uncertain behavior, polycythemia vera and myelodysplastic syndromes_48m | Yes |
| D49_D49_6m  | Neoplasms of unspecified behavior_6m                                                 | No  |
| D49_D49_12m | Neoplasms of unspecified behavior_12m                                                | No  |
| D49_D49_24m | Neoplasms of unspecified behavior_24m                                                | No  |
| D49_D49_48m | Neoplasms of unspecified behavior_48m                                                | No  |
| D50_D53_6m  | Nutritional anemias_6m                                                               | Yes |
| D50_D53_12m | Nutritional anemias_12m                                                              | Yes |
| D50_D53_24m | Nutritional anemias_24m                                                              | Yes |
| D50_D53_48m | Nutritional anemias_48m                                                              | Yes |
| D55_D59_6m  | Hemolytic anemias_6m                                                                 | No  |
| D55_D59_12m | Hemolytic anemias_12m                                                                | No  |
| D55_D59_24m | Hemolytic anemias_24m                                                                | No  |
| D55_D59_48m | Hemolytic anemias_48m                                                                | No  |
| D60_D64_6m  | Aplastic and other anemias and other bone marrow failure syndromes_6m                | Yes |



|             |                                                                        |     |
|-------------|------------------------------------------------------------------------|-----|
| D60_D64_12m | Aplastic and other anemias and other bone marrow failure syndromes_12m | Yes |
| D60_D64_24m | Aplastic and other anemias and other bone marrow failure syndromes_24m | Yes |
| D60_D64_48m | Aplastic and other anemias and other bone marrow failure syndromes_48m | Yes |
| D65_D69_6m  | Coagulation defects, purpura and other hemorrhagic conditions_6m       | Yes |
| D65_D69_12m | Coagulation defects, purpura and other hemorrhagic conditions_12m      | Yes |
| D65_D69_24m | Coagulation defects, purpura and other hemorrhagic conditions_24m      | Yes |
| D65_D69_48m | Coagulation defects, purpura and other hemorrhagic conditions_48m      | Yes |
| D70_D77_6m  | Other disorders of blood and blood-forming organs_6m                   | No  |
| D70_D77_12m | Other disorders of blood and blood-forming organs_12m                  | Yes |
| D70_D77_24m | Other disorders of blood and blood-forming organs_24m                  | Yes |
| D70_D77_48m | Other disorders of blood and blood-forming organs_48m                  | Yes |
| D78_D78_6m  | Intraoperative and postprocedural complications of the spleen_6m       | No  |
| D78_D78_12m | Intraoperative and postprocedural complications of the spleen_12m      | No  |
| D78_D78_24m | Intraoperative and postprocedural complications of the spleen_24m      | No  |
| D78_D78_48m | Intraoperative and postprocedural complications of the spleen_48m      | No  |
| D80_D89_6m  | Certain disorders involving the immune mechanism_6m                    | No  |
| D80_D89_12m | Certain disorders involving the immune mechanism_12m                   | Yes |
| D80_D89_24m | Certain disorders involving the immune mechanism_24m                   | Yes |
| D80_D89_48m | Certain disorders involving the immune mechanism_48m                   | Yes |
| E00_E07_6m  | Disorders of thyroid gland_6m                                          | Yes |
| E00_E07_12m | Disorders of thyroid gland_12m                                         | Yes |
| E00_E07_24m | Disorders of thyroid gland_24m                                         | Yes |
| E00_E07_48m | Disorders of thyroid gland_48m                                         | Yes |
| E08_E13_6m  | Diabetes mellitus_6m                                                   | Yes |
| E08_E13_12m | Diabetes mellitus_12m                                                  | Yes |
| E08_E13_24m | Diabetes mellitus_24m                                                  | Yes |

|             |                                                                             |     |
|-------------|-----------------------------------------------------------------------------|-----|
| E08_E13_48m | Diabetes mellitus_48m                                                       | Yes |
| E15_E16_6m  | Other disorders of glucose regulation and pancreatic internal secretion_6m  | Yes |
| E15_E16_12m | Other disorders of glucose regulation and pancreatic internal secretion_12m | Yes |
| E15_E16_24m | Other disorders of glucose regulation and pancreatic internal secretion_24m | Yes |
| E15_E16_48m | Other disorders of glucose regulation and pancreatic internal secretion_48m | Yes |
| E20_E35_6m  | Disorders of other endocrine glands_6m                                      | Yes |
| E20_E35_12m | Disorders of other endocrine glands_12m                                     | Yes |
| E20_E35_24m | Disorders of other endocrine glands_24m                                     | Yes |
| E20_E35_48m | Disorders of other endocrine glands_48m                                     | Yes |
| E36_E36_6m  | Intraoperative complications of endocrine system_6m                         | No  |
| E36_E36_12m | Intraoperative complications of endocrine system_12m                        | No  |
| E36_E36_24m | Intraoperative complications of endocrine system_24m                        | No  |
| E36_E36_48m | Intraoperative complications of endocrine system_48m                        | No  |
| E40_E46_6m  | Malnutrition_6m                                                             | No  |
| E40_E46_12m | Malnutrition_12m                                                            | No  |
| E40_E46_24m | Malnutrition_24m                                                            | No  |
| E40_E46_48m | Malnutrition_48m                                                            | No  |
| E50_E64_6m  | Other nutritional deficiencies_6m                                           | Yes |
| E50_E64_12m | Other nutritional deficiencies_12m                                          | Yes |
| E50_E64_24m | Other nutritional deficiencies_24m                                          | Yes |
| E50_E64_48m | Other nutritional deficiencies_48m                                          | Yes |
| E65_E68_6m  | Overweight, obesity and other hyperalimentation_6m                          | Yes |
| E65_E68_12m | Overweight, obesity and other hyperalimentation_12m                         | Yes |
| E65_E68_24m | Overweight, obesity and other hyperalimentation_24m                         | Yes |
| E65_E68_48m | Overweight, obesity and other hyperalimentation_48m                         | Yes |
| E70_E88_6m  | Metabolic disorders_6m                                                      | Yes |

|             |                                                                                                  |     |
|-------------|--------------------------------------------------------------------------------------------------|-----|
| E70_E88_12m | Metabolic disorders_12m                                                                          | Yes |
| E70_E88_24m | Metabolic disorders_24m                                                                          | Yes |
| E70_E88_48m | Metabolic disorders_48m                                                                          | Yes |
| E89_E89_6m  | Postprocedural endocrine and metabolic complications and disorders, not elsewhere classified_6m  | No  |
| E89_E89_12m | Postprocedural endocrine and metabolic complications and disorders, not elsewhere classified_12m | No  |
| E89_E89_24m | Postprocedural endocrine and metabolic complications and disorders, not elsewhere classified_24m | Yes |
| E89_E89_48m | Postprocedural endocrine and metabolic complications and disorders, not elsewhere classified_48m | Yes |
| G00_G09_6m  | Inflammatory diseases of the central nervous system_6m                                           | No  |
| G00_G09_12m | Inflammatory diseases of the central nervous system_12m                                          | No  |
| G00_G09_24m | Inflammatory diseases of the central nervous system_24m                                          | No  |
| G00_G09_48m | Inflammatory diseases of the central nervous system_48m                                          | Yes |
| G10_G14_6m  | Systemic atrophies primarily affecting the central nervous system_6m                             | Yes |
| G10_G14_12m | Systemic atrophies primarily affecting the central nervous system_12m                            | Yes |
| G10_G14_24m | Systemic atrophies primarily affecting the central nervous system_24m                            | Yes |
| G10_G14_48m | Systemic atrophies primarily affecting the central nervous system_48m                            | Yes |
| G20_G26_6m  | Extrapyramidal and movement disorders_6m                                                         | Yes |
| G20_G26_12m | Extrapyramidal and movement disorders_12m                                                        | Yes |
| G20_G26_24m | Extrapyramidal and movement disorders_24m                                                        | Yes |
| G20_G26_48m | Extrapyramidal and movement disorders_48m                                                        | Yes |
| G30_G32_6m  | Other degenerative diseases of the nervous system_6m                                             | No  |
| G30_G32_12m | Other degenerative diseases of the nervous system_12m                                            | Yes |
| G30_G32_24m | Other degenerative diseases of the nervous system_24m                                            | Yes |
| G30_G32_48m | Other degenerative diseases of the nervous system_48m                                            | Yes |
| G35_G37_6m  | Demyelinating diseases of the central nervous system_6m                                          | Yes |
| G35_G37_12m | Demyelinating diseases of the central nervous system_12m                                         | Yes |
| G35_G37_24m | Demyelinating diseases of the central nervous system_24m                                         | Yes |

|             |                                                                           |     |
|-------------|---------------------------------------------------------------------------|-----|
| G35_G37_48m | Demyelinating diseases of the central nervous system_48m                  | Yes |
| G40_G47_6m  | Episodic and paroxysmal disorders_6m                                      | Yes |
| G40_G47_12m | Episodic and paroxysmal disorders_12m                                     | Yes |
| G40_G47_24m | Episodic and paroxysmal disorders_24m                                     | Yes |
| G40_G47_48m | Episodic and paroxysmal disorders_48m                                     | Yes |
| G50_G59_6m  | Nerve, nerve root and plexus disorders_6m                                 | Yes |
| G50_G59_12m | Nerve, nerve root and plexus disorders_12m                                | Yes |
| G50_G59_24m | Nerve, nerve root and plexus disorders_24m                                | Yes |
| G50_G59_48m | Nerve, nerve root and plexus disorders_48m                                | Yes |
| G60_G65_6m  | Polyneuropathies and other disorders of the peripheral nervous system_6m  | Yes |
| G60_G65_12m | Polyneuropathies and other disorders of the peripheral nervous system_12m | Yes |
| G60_G65_24m | Polyneuropathies and other disorders of the peripheral nervous system_24m | Yes |
| G60_G65_48m | Polyneuropathies and other disorders of the peripheral nervous system_48m | Yes |
| G70_G73_6m  | Diseases of myoneural junction and muscle_6m                              | No  |
| G70_G73_12m | Diseases of myoneural junction and muscle_12m                             | No  |
| G70_G73_24m | Diseases of myoneural junction and muscle_24m                             | No  |
| G70_G73_48m | Diseases of myoneural junction and muscle_48m                             | No  |
| G80_G83_6m  | Cerebral palsy and other paralytic syndromes_6m                           | Yes |
| G80_G83_12m | Cerebral palsy and other paralytic syndromes_12m                          | Yes |
| G80_G83_24m | Cerebral palsy and other paralytic syndromes_24m                          | Yes |
| G80_G83_48m | Cerebral palsy and other paralytic syndromes_48m                          | Yes |
| G89_G99_6m  | Other disorders of the nervous system_6m                                  | Yes |
| G89_G99_12m | Other disorders of the nervous system_12m                                 | Yes |
| G89_G99_24m | Other disorders of the nervous system_24m                                 | Yes |
| G89_G99_48m | Other disorders of the nervous system_48m                                 | Yes |
| H00_H05_6m  | Disorders of eyelid, lacrimal system and orbit_6m                         | Yes |

|             |                                                        |     |
|-------------|--------------------------------------------------------|-----|
| H00_H05_12m | Disorders of eyelid, lacrimal system and orbit_12m     | Yes |
| H00_H05_24m | Disorders of eyelid, lacrimal system and orbit_24m     | Yes |
| H00_H05_48m | Disorders of eyelid, lacrimal system and orbit_48m     | Yes |
| H10_H11_6m  | Disorders of conjunctiva_6m                            | Yes |
| H10_H11_12m | Disorders of conjunctiva_12m                           | Yes |
| H10_H11_24m | Disorders of conjunctiva_24m                           | Yes |
| H10_H11_48m | Disorders of conjunctiva_48m                           | Yes |
| H15_H22_6m  | Disorders of sclera, cornea, iris and ciliary body_6m  | No  |
| H15_H22_12m | Disorders of sclera, cornea, iris and ciliary body_12m | Yes |
| H15_H22_24m | Disorders of sclera, cornea, iris and ciliary body_24m | Yes |
| H15_H22_48m | Disorders of sclera, cornea, iris and ciliary body_48m | Yes |
| H25_H28_6m  | Disorders of lens_6m                                   | Yes |
| H25_H28_12m | Disorders of lens_12m                                  | Yes |
| H25_H28_24m | Disorders of lens_24m                                  | Yes |
| H25_H28_48m | Disorders of lens_48m                                  | Yes |
| H30_H36_6m  | Disorders of choroid and retina_6m                     | Yes |
| H30_H36_12m | Disorders of choroid and retina_12m                    | Yes |
| H30_H36_24m | Disorders of choroid and retina_24m                    | Yes |
| H30_H36_48m | Disorders of choroid and retina_48m                    | Yes |
| H40_H42_6m  | Glaucoma_6m                                            | Yes |
| H40_H42_12m | Glaucoma_12m                                           | Yes |
| H40_H42_24m | Glaucoma_24m                                           | Yes |
| H40_H42_48m | Glaucoma_48m                                           | Yes |
| H43_H44_6m  | Disorders of vitreous body and globe_6m                | No  |
| H43_H44_12m | Disorders of vitreous body and globe_12m               | Yes |
| H43_H44_24m | Disorders of vitreous body and globe_24m               | Yes |
| H43_H44_48m | Disorders of vitreous body and globe_48m               | Yes |
| H46_H47_6m  | Disorders of optic nerve and visual pathways_6m        | No  |

|             |                                                                                                               |     |
|-------------|---------------------------------------------------------------------------------------------------------------|-----|
| H46_H47_12m | Disorders of optic nerve and visual pathways_12m                                                              | No  |
| H46_H47_24m | Disorders of optic nerve and visual pathways_24m                                                              | No  |
| H46_H47_48m | Disorders of optic nerve and visual pathways_48m                                                              | No  |
| H49_H52_6m  | Disorders of ocular muscles, binocular movement, accommodation and refraction_6m                              | Yes |
| H49_H52_12m | Disorders of ocular muscles, binocular movement, accommodation and refraction_12m                             | Yes |
| H49_H52_24m | Disorders of ocular muscles, binocular movement, accommodation and refraction_24m                             | Yes |
| H49_H52_48m | Disorders of ocular muscles, binocular movement, accommodation and refraction_48m                             | Yes |
| H53_H54_6m  | Visual disturbances and blindness_6m                                                                          | Yes |
| H53_H54_12m | Visual disturbances and blindness_12m                                                                         | Yes |
| H53_H54_24m | Visual disturbances and blindness_24m                                                                         | Yes |
| H53_H54_48m | Visual disturbances and blindness_48m                                                                         | Yes |
| H55_H57_6m  | Other disorders of eye and adnexa_6m                                                                          | No  |
| H55_H57_12m | Other disorders of eye and adnexa_12m                                                                         | No  |
| H55_H57_24m | Other disorders of eye and adnexa_24m                                                                         | Yes |
| H55_H57_48m | Other disorders of eye and adnexa_48m                                                                         | Yes |
| H59_H59_6m  | Intraoperative and postprocedural complications and disorders of eye and adnexa, not elsewhere classified_6m  | No  |
| H59_H59_12m | Intraoperative and postprocedural complications and disorders of eye and adnexa, not elsewhere classified_12m | No  |
| H59_H59_24m | Intraoperative and postprocedural complications and disorders of eye and adnexa, not elsewhere classified_24m | No  |
| H59_H59_48m | Intraoperative and postprocedural complications and disorders of eye and adnexa, not elsewhere classified_48m | No  |
| H60_H62_6m  | Diseases of external ear_6m                                                                                   | No  |
| H60_H62_12m | Diseases of external ear_12m                                                                                  | No  |
| H60_H62_24m | Diseases of external ear_24m                                                                                  | Yes |
| H60_H62_48m | Diseases of external ear_48m                                                                                  | Yes |

|             |                                                                                                                        |     |
|-------------|------------------------------------------------------------------------------------------------------------------------|-----|
| H65_H75_6m  | Diseases of middle ear and mastoid_6m                                                                                  | Yes |
| H65_H75_12m | Diseases of middle ear and mastoid_12m                                                                                 | Yes |
| H65_H75_24m | Diseases of middle ear and mastoid_24m                                                                                 | Yes |
| H65_H75_48m | Diseases of middle ear and mastoid_48m                                                                                 | Yes |
| H80_H83_6m  | Diseases of inner ear_6m                                                                                               | Yes |
| H80_H83_12m | Diseases of inner ear_12m                                                                                              | Yes |
| H80_H83_24m | Diseases of inner ear_24m                                                                                              | Yes |
| H80_H83_48m | Diseases of inner ear_48m                                                                                              | Yes |
| H90_H94_6m  | Other disorders of ear_6m                                                                                              | Yes |
| H90_H94_12m | Other disorders of ear_12m                                                                                             | Yes |
| H90_H94_24m | Other disorders of ear_24m                                                                                             | Yes |
| H90_H94_48m | Other disorders of ear_48m                                                                                             | Yes |
| H95_H95_6m  | Intraoperative and postprocedural complications and disorders of ear and mastoid process, not elsewhere classified_6m  | No  |
| H95_H95_12m | Intraoperative and postprocedural complications and disorders of ear and mastoid process, not elsewhere classified_12m | No  |
| H95_H95_24m | Intraoperative and postprocedural complications and disorders of ear and mastoid process, not elsewhere classified_24m | No  |
| H95_H95_48m | Intraoperative and postprocedural complications and disorders of ear and mastoid process, not elsewhere classified_48m | No  |
| I00_I02_6m  | Acute rheumatic fever_6m                                                                                               | No  |
| I00_I02_12m | Acute rheumatic fever_12m                                                                                              | No  |
| I00_I02_24m | Acute rheumatic fever_24m                                                                                              | No  |
| I00_I02_48m | Acute rheumatic fever_48m                                                                                              | No  |
| I05_I09_6m  | Chronic rheumatic heart diseases_6m                                                                                    | No  |
| I05_I09_12m | Chronic rheumatic heart diseases_12m                                                                                   | No  |
| I05_I09_24m | Chronic rheumatic heart diseases_24m                                                                                   | No  |
| I05_I09_48m | Chronic rheumatic heart diseases_48m                                                                                   | No  |
| I10_I16_6m  | Hypertensive diseases_6m                                                                                               | Yes |
| I10_I16_12m | Hypertensive diseases_12m                                                                                              | Yes |

|             |                                                                                    |     |
|-------------|------------------------------------------------------------------------------------|-----|
| I10_I16_24m | Hypertensive diseases_24m                                                          | Yes |
| I10_I16_48m | Hypertensive diseases_48m                                                          | Yes |
| I20_I25_6m  | Ischemic heart diseases_6m                                                         | Yes |
| I20_I25_12m | Ischemic heart diseases_12m                                                        | Yes |
| I20_I25_24m | Ischemic heart diseases_24m                                                        | Yes |
| I20_I25_48m | Ischemic heart diseases_48m                                                        | Yes |
| I26_I28_6m  | Pulmonary heart disease and diseases of pulmonary circulation_6m                   | Yes |
| I26_I28_12m | Pulmonary heart disease and diseases of pulmonary circulation_12m                  | Yes |
| I26_I28_24m | Pulmonary heart disease and diseases of pulmonary circulation_24m                  | Yes |
| I26_I28_48m | Pulmonary heart disease and diseases of pulmonary circulation_48m                  | Yes |
| I30_I52_6m  | Other forms of heart disease_6m                                                    | Yes |
| I30_I52_12m | Other forms of heart disease_12m                                                   | Yes |
| I30_I52_24m | Other forms of heart disease_24m                                                   | Yes |
| I30_I52_48m | Other forms of heart disease_48m                                                   | Yes |
| I60_I69_6m  | Cerebrovascular diseases_6m                                                        | Yes |
| I60_I69_12m | Cerebrovascular diseases_12m                                                       | Yes |
| I60_I69_24m | Cerebrovascular diseases_24m                                                       | Yes |
| I60_I69_48m | Cerebrovascular diseases_48m                                                       | Yes |
| I70_I79_6m  | Diseases of arteries, arterioles and capillaries_6m                                | Yes |
| I70_I79_12m | Diseases of arteries, arterioles and capillaries_12m                               | Yes |
| I70_I79_24m | Diseases of arteries, arterioles and capillaries_24m                               | Yes |
| I70_I79_48m | Diseases of arteries, arterioles and capillaries_48m                               | Yes |
| I80_I89_6m  | Diseases of veins, lymphatic vessels and lymph nodes, not elsewhere classified_6m  | Yes |
| I80_I89_12m | Diseases of veins, lymphatic vessels and lymph nodes, not elsewhere classified_12m | Yes |
| I80_I89_24m | Diseases of veins, lymphatic vessels and lymph nodes, not elsewhere classified_24m | Yes |
| I80_I89_48m | Diseases of veins, lymphatic vessels and lymph nodes, not elsewhere classified_48m | Yes |



|             |                                                               |     |
|-------------|---------------------------------------------------------------|-----|
| I95_I99_6m  | Other and unspecified disorders of the circulatory system_6m  | Yes |
| I95_I99_12m | Other and unspecified disorders of the circulatory system_12m | Yes |
| I95_I99_24m | Other and unspecified disorders of the circulatory system_24m | Yes |
| I95_I99_48m | Other and unspecified disorders of the circulatory system_48m | Yes |
| J00_J06_6m  | Acute upper respiratory infections_6m                         | No  |
| J00_J06_12m | Acute upper respiratory infections_12m                        | Yes |
| J00_J06_24m | Acute upper respiratory infections_24m                        | Yes |
| J00_J06_48m | Acute upper respiratory infections_48m                        | Yes |
| J09_J18_6m  | Influenza and pneumonia_6m                                    | Yes |
| J09_J18_12m | Influenza and pneumonia_12m                                   | Yes |
| J09_J18_24m | Influenza and pneumonia_24m                                   | Yes |
| J09_J18_48m | Influenza and pneumonia_48m                                   | Yes |
| J20_J22_6m  | Other acute lower respiratory infections_6m                   | Yes |
| J20_J22_12m | Other acute lower respiratory infections_12m                  | Yes |
| J20_J22_24m | Other acute lower respiratory infections_24m                  | Yes |
| J20_J22_48m | Other acute lower respiratory infections_48m                  | Yes |
| J30_J39_6m  | Other diseases of upper respiratory tract_6m                  | Yes |
| J30_J39_12m | Other diseases of upper respiratory tract_12m                 | Yes |
| J30_J39_24m | Other diseases of upper respiratory tract_24m                 | Yes |
| J30_J39_48m | Other diseases of upper respiratory tract_48m                 | Yes |
| J40_J47_6m  | Chronic lower respiratory diseases_6m                         | Yes |
| J40_J47_12m | Chronic lower respiratory diseases_12m                        | Yes |
| J40_J47_24m | Chronic lower respiratory diseases_24m                        | Yes |
| J40_J47_48m | Chronic lower respiratory diseases_48m                        | Yes |
| J60_J70_6m  | Lung diseases due to external agents_6m                       | Yes |
| J60_J70_12m | Lung diseases due to external agents_12m                      | Yes |
| J60_J70_24m | Lung diseases due to external agents_24m                      | Yes |
| J60_J70_48m | Lung diseases due to external agents_48m                      | Yes |

|             |                                                                                                                   |     |
|-------------|-------------------------------------------------------------------------------------------------------------------|-----|
| J80_J84_6m  | Other respiratory diseases principally affecting the interstitium_6m                                              | Yes |
| J80_J84_12m | Other respiratory diseases principally affecting the interstitium_12m                                             | Yes |
| J80_J84_24m | Other respiratory diseases principally affecting the interstitium_24m                                             | Yes |
| J80_J84_48m | Other respiratory diseases principally affecting the interstitium_48m                                             | Yes |
| J85_J86_6m  | Suppurative and necrotic conditions of the lower respiratory tract_6m                                             | No  |
| J85_J86_12m | Suppurative and necrotic conditions of the lower respiratory tract_12m                                            | Yes |
| J85_J86_24m | Suppurative and necrotic conditions of the lower respiratory tract_24m                                            | Yes |
| J85_J86_48m | Suppurative and necrotic conditions of the lower respiratory tract_48m                                            | Yes |
| J90_J94_6m  | Other diseases of the pleura_6m                                                                                   | Yes |
| J90_J94_12m | Other diseases of the pleura_12m                                                                                  | Yes |
| J90_J94_24m | Other diseases of the pleura_24m                                                                                  | Yes |
| J90_J94_48m | Other diseases of the pleura_48m                                                                                  | Yes |
| J95_J95_6m  | Intraoperative and postprocedural complications and disorders of respiratory system, not elsewhere classified_6m  | No  |
| J95_J95_12m | Intraoperative and postprocedural complications and disorders of respiratory system, not elsewhere classified_12m | No  |
| J95_J95_24m | Intraoperative and postprocedural complications and disorders of respiratory system, not elsewhere classified_24m | No  |
| J95_J95_48m | Intraoperative and postprocedural complications and disorders of respiratory system, not elsewhere classified_48m | No  |
| J96_J99_6m  | Other diseases of the respiratory system_6m                                                                       | Yes |
| J96_J99_12m | Other diseases of the respiratory system_12m                                                                      | Yes |
| J96_J99_24m | Other diseases of the respiratory system_24m                                                                      | Yes |
| J96_J99_48m | Other diseases of the respiratory system_48m                                                                      | Yes |
| K00_K14_6m  | Diseases of oral cavity and salivary glands_6m                                                                    | Yes |
| K00_K14_12m | Diseases of oral cavity and salivary glands_12m                                                                   | Yes |
| K00_K14_24m | Diseases of oral cavity and salivary glands_24m                                                                   | Yes |
| K00_K14_48m | Diseases of oral cavity and salivary glands_48m                                                                   | Yes |
| K20_K31_6m  | Diseases of esophagus, stomach and duodenum_6m                                                                    | Yes |
| K20_K31_12m | Diseases of esophagus, stomach and duodenum_12m                                                                   | Yes |

|             |                                                          |     |
|-------------|----------------------------------------------------------|-----|
| K20_K31_24m | Diseases of esophagus, stomach and duodenum_24m          | Yes |
| K20_K31_48m | Diseases of esophagus, stomach and duodenum_48m          | Yes |
| K35_K38_6m  | Diseases of appendix_6m                                  | No  |
| K35_K38_12m | Diseases of appendix_12m                                 | Yes |
| K35_K38_24m | Diseases of appendix_24m                                 | Yes |
| K35_K38_48m | Diseases of appendix_48m                                 | Yes |
| K40_K46_6m  | Hernia_6m                                                | Yes |
| K40_K46_12m | Hernia_12m                                               | Yes |
| K40_K46_24m | Hernia_24m                                               | Yes |
| K40_K46_48m | Hernia_48m                                               | Yes |
| K50_K52_6m  | Noninfective enteritis and colitis_6m                    | Yes |
| K50_K52_12m | Noninfective enteritis and colitis_12m                   | Yes |
| K50_K52_24m | Noninfective enteritis and colitis_24m                   | Yes |
| K50_K52_48m | Noninfective enteritis and colitis_48m                   | Yes |
| K55_K64_6m  | Other diseases of intestines_6m                          | Yes |
| K55_K64_12m | Other diseases of intestines_12m                         | Yes |
| K55_K64_24m | Other diseases of intestines_24m                         | Yes |
| K55_K64_48m | Other diseases of intestines_48m                         | Yes |
| K65_K68_6m  | Diseases of peritoneum and retroperitoneum_6m            | No  |
| K65_K68_12m | Diseases of peritoneum and retroperitoneum_12m           | No  |
| K65_K68_24m | Diseases of peritoneum and retroperitoneum_24m           | Yes |
| K65_K68_48m | Diseases of peritoneum and retroperitoneum_48m           | Yes |
| K70_K77_6m  | Diseases of liver_6m                                     | Yes |
| K70_K77_12m | Diseases of liver_12m                                    | Yes |
| K70_K77_24m | Diseases of liver_24m                                    | Yes |
| K70_K77_48m | Diseases of liver_48m                                    | Yes |
| K80_K87_6m  | Disorders of gallbladder, biliary tract and pancreas_6m  | Yes |
| K80_K87_12m | Disorders of gallbladder, biliary tract and pancreas_12m | Yes |

|             |                                                                     |     |
|-------------|---------------------------------------------------------------------|-----|
| K80_K87_24m | Disorders of gallbladder, biliary tract and pancreas_24m            | Yes |
| K80_K87_48m | Disorders of gallbladder, biliary tract and pancreas_48m            | Yes |
| K90_K95_6m  | Other diseases of the digestive system_6m                           | Yes |
| K90_K95_12m | Other diseases of the digestive system_12m                          | Yes |
| K90_K95_24m | Other diseases of the digestive system_24m                          | Yes |
| K90_K95_48m | Other diseases of the digestive system_48m                          | Yes |
| L00_L08_6m  | Infections of the skin and subcutaneous tissue_6m                   | Yes |
| L00_L08_12m | Infections of the skin and subcutaneous tissue_12m                  | Yes |
| L00_L08_24m | Infections of the skin and subcutaneous tissue_24m                  | Yes |
| L00_L08_48m | Infections of the skin and subcutaneous tissue_48m                  | Yes |
| L10_L14_6m  | Bullous disorders_6m                                                | No  |
| L10_L14_12m | Bullous disorders_12m                                               | No  |
| L10_L14_24m | Bullous disorders_24m                                               | No  |
| L10_L14_48m | Bullous disorders_48m                                               | No  |
| L20_L30_6m  | Dermatitis and eczema_6m                                            | Yes |
| L20_L30_12m | Dermatitis and eczema_12m                                           | Yes |
| L20_L30_24m | Dermatitis and eczema_24m                                           | Yes |
| L20_L30_48m | Dermatitis and eczema_48m                                           | Yes |
| L40_L45_6m  | Papulosquamous disorders_6m                                         | Yes |
| L40_L45_12m | Papulosquamous disorders_12m                                        | Yes |
| L40_L45_24m | Papulosquamous disorders_24m                                        | Yes |
| L40_L45_48m | Papulosquamous disorders_48m                                        | Yes |
| L49_L54_6m  | Urticaria and erythema_6m                                           | No  |
| L49_L54_12m | Urticaria and erythema_12m                                          | No  |
| L49_L54_24m | Urticaria and erythema_24m                                          | Yes |
| L49_L54_48m | Urticaria and erythema_48m                                          | Yes |
| L55_L59_6m  | Radiation-related disorders of the skin and subcutaneous tissue_6m  | No  |
| L55_L59_12m | Radiation-related disorders of the skin and subcutaneous tissue_12m | No  |

|             |                                                                                     |     |
|-------------|-------------------------------------------------------------------------------------|-----|
| L55_L59_24m | Radiation-related disorders of the skin and subcutaneous tissue_24m                 | No  |
| L55_L59_48m | Radiation-related disorders of the skin and subcutaneous tissue_48m                 | Yes |
| L60_L75_6m  | Disorders of skin appendages_6m                                                     | Yes |
| L60_L75_12m | Disorders of skin appendages_12m                                                    | Yes |
| L60_L75_24m | Disorders of skin appendages_24m                                                    | Yes |
| L60_L75_48m | Disorders of skin appendages_48m                                                    | Yes |
| L76_L76_6m  | Intraoperative and postprocedural complications of skin and subcutaneous tissue_6m  | No  |
| L76_L76_12m | Intraoperative and postprocedural complications of skin and subcutaneous tissue_12m | No  |
| L76_L76_24m | Intraoperative and postprocedural complications of skin and subcutaneous tissue_24m | No  |
| L76_L76_48m | Intraoperative and postprocedural complications of skin and subcutaneous tissue_48m | No  |
| L80_L99_6m  | Other disorders of the skin and subcutaneous tissue_6m                              | Yes |
| L80_L99_12m | Other disorders of the skin and subcutaneous tissue_12m                             | Yes |
| L80_L99_24m | Other disorders of the skin and subcutaneous tissue_24m                             | Yes |
| L80_L99_48m | Other disorders of the skin and subcutaneous tissue_48m                             | Yes |
| M00_M02_6m  | Infectious arthropathies_6m                                                         | No  |
| M00_M02_12m | Infectious arthropathies_12m                                                        | No  |
| M00_M02_24m | Infectious arthropathies_24m                                                        | Yes |
| M00_M02_48m | Infectious arthropathies_48m                                                        | Yes |
| M04_M04_6m  | Autoinflammatory syndromes_6m                                                       | No  |
| M04_M04_12m | Autoinflammatory syndromes_12m                                                      | No  |
| M04_M04_24m | Autoinflammatory syndromes_24m                                                      | No  |
| M04_M04_48m | Autoinflammatory syndromes_48m                                                      | No  |
| M05_M14_6m  | Inflammatory polyarthropathies_6m                                                   | Yes |
| M05_M14_12m | Inflammatory polyarthropathies_12m                                                  | Yes |
| M05_M14_24m | Inflammatory polyarthropathies_24m                                                  | Yes |
| M05_M14_48m | Inflammatory polyarthropathies_48m                                                  | Yes |

|             |                                                                               |     |
|-------------|-------------------------------------------------------------------------------|-----|
| M15_M19_6m  | Osteoarthritis_6m                                                             | Yes |
| M15_M19_12m | Osteoarthritis_12m                                                            | Yes |
| M15_M19_24m | Osteoarthritis_24m                                                            | Yes |
| M15_M19_48m | Osteoarthritis_48m                                                            | Yes |
| M20_M25_6m  | Other joint disorders_6m                                                      | Yes |
| M20_M25_12m | Other joint disorders_12m                                                     | Yes |
| M20_M25_24m | Other joint disorders_24m                                                     | Yes |
| M20_M25_48m | Other joint disorders_48m                                                     | Yes |
| M26_M27_6m  | Dentofacial anomalies [including malocclusion] and other disorders of jaw_6m  | No  |
| M26_M27_12m | Dentofacial anomalies [including malocclusion] and other disorders of jaw_12m | No  |
| M26_M27_24m | Dentofacial anomalies [including malocclusion] and other disorders of jaw_24m | No  |
| M26_M27_48m | Dentofacial anomalies [including malocclusion] and other disorders of jaw_48m | No  |
| M30_M36_6m  | Systemic connective tissue disorders_6m                                       | Yes |
| M30_M36_12m | Systemic connective tissue disorders_12m                                      | Yes |
| M30_M36_24m | Systemic connective tissue disorders_24m                                      | Yes |
| M30_M36_48m | Systemic connective tissue disorders_48m                                      | Yes |
| M40_M43_6m  | Deforming dorsopathies_6m                                                     | Yes |
| M40_M43_12m | Deforming dorsopathies_12m                                                    | Yes |
| M40_M43_24m | Deforming dorsopathies_24m                                                    | Yes |
| M40_M43_48m | Deforming dorsopathies_48m                                                    | Yes |
| M45_M49_6m  | Spondylopathies_6m                                                            | Yes |
| M45_M49_12m | Spondylopathies_12m                                                           | Yes |
| M45_M49_24m | Spondylopathies_24m                                                           | Yes |
| M45_M49_48m | Spondylopathies_48m                                                           | Yes |
| M50_M54_6m  | Other dorsopathies_6m                                                         | Yes |
| M50_M54_12m | Other dorsopathies_12m                                                        | Yes |

|             |                                                                        |     |
|-------------|------------------------------------------------------------------------|-----|
| M50_M54_24m | Other dorsopathies_24m                                                 | Yes |
| M50_M54_48m | Other dorsopathies_48m                                                 | Yes |
| M60_M63_6m  | Disorders of muscles_6m                                                | Yes |
| M60_M63_12m | Disorders of muscles_12m                                               | Yes |
| M60_M63_24m | Disorders of muscles_24m                                               | Yes |
| M60_M63_48m | Disorders of muscles_48m                                               | Yes |
| M65_M67_6m  | Disorders of synovium and tendon_6m                                    | Yes |
| M65_M67_12m | Disorders of synovium and tendon_12m                                   | Yes |
| M65_M67_24m | Disorders of synovium and tendon_24m                                   | Yes |
| M65_M67_48m | Disorders of synovium and tendon_48m                                   | Yes |
| M70_M79_6m  | Other soft tissue disorders_6m                                         | Yes |
| M70_M79_12m | Other soft tissue disorders_12m                                        | Yes |
| M70_M79_24m | Other soft tissue disorders_24m                                        | Yes |
| M70_M79_48m | Other soft tissue disorders_48m                                        | Yes |
| M80_M85_6m  | Disorders of bone density and structure_6m                             | Yes |
| M80_M85_12m | Disorders of bone density and structure_12m                            | Yes |
| M80_M85_24m | Disorders of bone density and structure_24m                            | Yes |
| M80_M85_48m | Disorders of bone density and structure_48m                            | Yes |
| M86_M90_6m  | Other osteopathies_6m                                                  | No  |
| M86_M90_12m | Other osteopathies_12m                                                 | Yes |
| M86_M90_24m | Other osteopathies_24m                                                 | Yes |
| M86_M90_48m | Other osteopathies_48m                                                 | Yes |
| M91_M94_6m  | Chondropathies_6m                                                      | No  |
| M91_M94_12m | Chondropathies_12m                                                     | No  |
| M91_M94_24m | Chondropathies_24m                                                     | No  |
| M91_M94_48m | Chondropathies_48m                                                     | Yes |
| M95_M95_6m  | Other disorders of the musculoskeletal system and connective tissue_6m | No  |

|             |                                                                                                                       |     |
|-------------|-----------------------------------------------------------------------------------------------------------------------|-----|
| M95_M95_12m | Other disorders of the musculoskeletal system and connective tissue_12m                                               | No  |
| M95_M95_24m | Other disorders of the musculoskeletal system and connective tissue_24m                                               | No  |
| M95_M95_48m | Other disorders of the musculoskeletal system and connective tissue_48m                                               | Yes |
| M96_M96_6m  | Intraoperative and postprocedural complications and disorders of musculoskeletal system, not elsewhere classified_6m  | No  |
| M96_M96_12m | Intraoperative and postprocedural complications and disorders of musculoskeletal system, not elsewhere classified_12m | No  |
| M96_M96_24m | Intraoperative and postprocedural complications and disorders of musculoskeletal system, not elsewhere classified_24m | No  |
| M96_M96_48m | Intraoperative and postprocedural complications and disorders of musculoskeletal system, not elsewhere classified_48m | Yes |
| M97_M97_6m  | Periprosthetic fracture around internal prosthetic joint_6m                                                           | No  |
| M97_M97_12m | Periprosthetic fracture around internal prosthetic joint_12m                                                          | No  |
| M97_M97_24m | Periprosthetic fracture around internal prosthetic joint_24m                                                          | No  |
| M97_M97_48m | Periprosthetic fracture around internal prosthetic joint_48m                                                          | No  |
| M99_M99_6m  | Biomechanical lesions, not elsewhere classified_6m                                                                    | No  |
| M99_M99_12m | Biomechanical lesions, not elsewhere classified_12m                                                                   | No  |
| M99_M99_24m | Biomechanical lesions, not elsewhere classified_24m                                                                   | No  |
| M99_M99_48m | Biomechanical lesions, not elsewhere classified_48m                                                                   | Yes |
| N00_N08_6m  | Glomerular diseases_6m                                                                                                | Yes |
| N00_N08_12m | Glomerular diseases_12m                                                                                               | Yes |
| N00_N08_24m | Glomerular diseases_24m                                                                                               | Yes |
| N00_N08_48m | Glomerular diseases_48m                                                                                               | Yes |
| N10_N16_6m  | Renal tubulo-interstitial diseases_6m                                                                                 | Yes |
| N10_N16_12m | Renal tubulo-interstitial diseases_12m                                                                                | Yes |
| N10_N16_24m | Renal tubulo-interstitial diseases_24m                                                                                | Yes |
| N10_N16_48m | Renal tubulo-interstitial diseases_48m                                                                                | Yes |
| N17_N19_6m  | Acute kidney failure and chronic kidney disease_6m                                                                    | Yes |



|             |                                                      |     |
|-------------|------------------------------------------------------|-----|
| N17_N19_12m | Acute kidney failure and chronic kidney disease_12m  | Yes |
| N17_N19_24m | Acute kidney failure and chronic kidney disease_24m  | Yes |
| N17_N19_48m | Acute kidney failure and chronic kidney disease_48m  | Yes |
| N20_N23_6m  | Urolithiasis_6m                                      | Yes |
| N20_N23_12m | Urolithiasis_12m                                     | Yes |
| N20_N23_24m | Urolithiasis_24m                                     | Yes |
| N20_N23_48m | Urolithiasis_48m                                     | Yes |
| N25_N29_6m  | Other disorders of kidney and ureter_6m              | No  |
| N25_N29_12m | Other disorders of kidney and ureter_12m             | No  |
| N25_N29_24m | Other disorders of kidney and ureter_24m             | Yes |
| N25_N29_48m | Other disorders of kidney and ureter_48m             | Yes |
| N30_N39_6m  | Other diseases of the urinary system_6m              | Yes |
| N30_N39_12m | Other diseases of the urinary system_12m             | Yes |
| N30_N39_24m | Other diseases of the urinary system_24m             | Yes |
| N30_N39_48m | Other diseases of the urinary system_48m             | Yes |
| N40_N53_6m  | Diseases of male genital organs_6m                   | Yes |
| N40_N53_12m | Diseases of male genital organs_12m                  | Yes |
| N40_N53_24m | Diseases of male genital organs_24m                  | Yes |
| N40_N53_48m | Diseases of male genital organs_48m                  | Yes |
| N60_N65_6m  | Disorders of breast_6m                               | Yes |
| N60_N65_12m | Disorders of breast_12m                              | Yes |
| N60_N65_24m | Disorders of breast_24m                              | Yes |
| N60_N65_48m | Disorders of breast_48m                              | Yes |
| N70_N77_6m  | Inflammatory diseases of female pelvic organs_6m     | No  |
| N70_N77_12m | Inflammatory diseases of female pelvic organs_12m    | No  |
| N70_N77_24m | Inflammatory diseases of female pelvic organs_24m    | Yes |
| N70_N77_48m | Inflammatory diseases of female pelvic organs_48m    | Yes |
| N80_N98_6m  | Noninflammatory disorders of female genital tract_6m | Yes |

|             |                                                                                                                     |     |
|-------------|---------------------------------------------------------------------------------------------------------------------|-----|
| N80_N98_12m | Noninflammatory disorders of female genital tract_12m                                                               | Yes |
| N80_N98_24m | Noninflammatory disorders of female genital tract_24m                                                               | Yes |
| N80_N98_48m | Noninflammatory disorders of female genital tract_48m                                                               | Yes |
| N99_N99_6m  | Intraoperative and postprocedural complications and disorders of genitourinary system, not elsewhere classified_6m  | No  |
| N99_N99_12m | Intraoperative and postprocedural complications and disorders of genitourinary system, not elsewhere classified_12m | No  |
| N99_N99_24m | Intraoperative and postprocedural complications and disorders of genitourinary system, not elsewhere classified_24m | Yes |
| N99_N99_48m | Intraoperative and postprocedural complications and disorders of genitourinary system, not elsewhere classified_48m | Yes |
| O00_O08_6m  | Pregnancy with abortive outcome_6m                                                                                  | Yes |
| O00_O08_12m | Pregnancy with abortive outcome_12m                                                                                 | Yes |
| O00_O08_24m | Pregnancy with abortive outcome_24m                                                                                 | Yes |
| O00_O08_48m | Pregnancy with abortive outcome_48m                                                                                 | Yes |
| O09_O09_6m  | Supervision of high risk pregnancy_6m                                                                               | No  |
| O09_O09_12m | Supervision of high risk pregnancy_12m                                                                              | No  |
| O09_O09_24m | Supervision of high risk pregnancy_24m                                                                              | No  |
| O09_O09_48m | Supervision of high risk pregnancy_48m                                                                              | No  |
| O10_O16_6m  | Edema, proteinuria and hypertensive disorders in pregnancy, childbirth and the puerperium_6m                        | No  |
| O10_O16_12m | Edema, proteinuria and hypertensive disorders in pregnancy, childbirth and the puerperium_12m                       | No  |
| O10_O16_24m | Edema, proteinuria and hypertensive disorders in pregnancy, childbirth and the puerperium_24m                       | No  |
| O10_O16_48m | Edema, proteinuria and hypertensive disorders in pregnancy, childbirth and the puerperium_48m                       | No  |
| O20_O29_6m  | Other maternal disorders predominantly related to pregnancy_6m                                                      | No  |
| O20_O29_12m | Other maternal disorders predominantly related to pregnancy_12m                                                     | No  |
| O20_O29_24m | Other maternal disorders predominantly related to pregnancy_24m                                                     | No  |
| O20_O29_48m | Other maternal disorders predominantly related to pregnancy_48m                                                     | Yes |

|             |                                                                                                 |     |
|-------------|-------------------------------------------------------------------------------------------------|-----|
| O30_O48_6m  | Maternal care related to the fetus and amniotic cavity and possible delivery problems_6m        | No  |
| O30_O48_12m | Maternal care related to the fetus and amniotic cavity and possible delivery problems_12m       | No  |
| O30_O48_24m | Maternal care related to the fetus and amniotic cavity and possible delivery problems_24m       | Yes |
| O30_O48_48m | Maternal care related to the fetus and amniotic cavity and possible delivery problems_48m       | Yes |
| O60_O77_6m  | Complications of labor and delivery_6m                                                          | No  |
| O60_O77_12m | Complications of labor and delivery_12m                                                         | No  |
| O60_O77_24m | Complications of labor and delivery_24m                                                         | Yes |
| O60_O77_48m | Complications of labor and delivery_48m                                                         | Yes |
| O80_O82_6m  | Encounter for delivery_6m                                                                       | No  |
| O80_O82_12m | Encounter for delivery_12m                                                                      | Yes |
| O80_O82_24m | Encounter for delivery_24m                                                                      | Yes |
| O80_O82_48m | Encounter for delivery_48m                                                                      | Yes |
| O85_O92_6m  | Complications predominantly related to the puerperium_6m                                        | No  |
| O85_O92_12m | Complications predominantly related to the puerperium_12m                                       | No  |
| O85_O92_24m | Complications predominantly related to the puerperium_24m                                       | No  |
| O85_O92_48m | Complications predominantly related to the puerperium_48m                                       | Yes |
| O94_O9A_6m  | Other obstetric conditions, not elsewhere classified_6m                                         | No  |
| O94_O9A_12m | Other obstetric conditions, not elsewhere classified_12m                                        | No  |
| O94_O9A_24m | Other obstetric conditions, not elsewhere classified_24m                                        | Yes |
| O94_O9A_48m | Other obstetric conditions, not elsewhere classified_48m                                        | Yes |
| P00_P04_6m  | Newborn affected by maternal factors and by complications of pregnancy, labor, and delivery_6m  | No  |
| P00_P04_12m | Newborn affected by maternal factors and by complications of pregnancy, labor, and delivery_12m | No  |
| P00_P04_24m | Newborn affected by maternal factors and by complications of pregnancy, labor, and delivery_24m | No  |

|             |                                                                                                 |    |
|-------------|-------------------------------------------------------------------------------------------------|----|
| P00_P04_48m | Newborn affected by maternal factors and by complications of pregnancy, labor, and delivery_48m | No |
| P05_P08_6m  | Disorders of newborn related to length of gestation and fetal growth_6m                         | No |
| P05_P08_12m | Disorders of newborn related to length of gestation and fetal growth_12m                        | No |
| P05_P08_24m | Disorders of newborn related to length of gestation and fetal growth_24m                        | No |
| P05_P08_48m | Disorders of newborn related to length of gestation and fetal growth_48m                        | No |
| P09_P09_6m  | Abnormal findings on neonatal screening_6m                                                      | No |
| P09_P09_12m | Abnormal findings on neonatal screening_12m                                                     | No |
| P09_P09_24m | Abnormal findings on neonatal screening_24m                                                     | No |
| P09_P09_48m | Abnormal findings on neonatal screening_48m                                                     | No |
| P10_P15_6m  | Birth trauma_6m                                                                                 | No |
| P10_P15_12m | Birth trauma_12m                                                                                | No |
| P10_P15_24m | Birth trauma_24m                                                                                | No |
| P10_P15_48m | Birth trauma_48m                                                                                | No |
| P19_P29_6m  | Respiratory and cardiovascular disorders specific to the perinatal period_6m                    | No |
| P19_P29_12m | Respiratory and cardiovascular disorders specific to the perinatal period_12m                   | No |
| P19_P29_24m | Respiratory and cardiovascular disorders specific to the perinatal period_24m                   | No |
| P19_P29_48m | Respiratory and cardiovascular disorders specific to the perinatal period_48m                   | No |
| P35_P39_6m  | Infections specific to the perinatal period_6m                                                  | No |
| P35_P39_12m | Infections specific to the perinatal period_12m                                                 | No |
| P35_P39_24m | Infections specific to the perinatal period_24m                                                 | No |
| P35_P39_48m | Infections specific to the perinatal period_48m                                                 | No |
| P50_P61_6m  | Hemorrhagic and hematological disorders of newborn_6m                                           | No |
| P50_P61_12m | Hemorrhagic and hematological disorders of newborn_12m                                          | No |

|             |                                                                               |    |
|-------------|-------------------------------------------------------------------------------|----|
| P50_P61_24m | Hemorrhagic and hematological disorders of newborn_24m                        | No |
| P50_P61_48m | Hemorrhagic and hematological disorders of newborn_48m                        | No |
| P70_P74_6m  | Transitory endocrine and metabolic disorders specific to newborn_6m           | No |
| P70_P74_12m | Transitory endocrine and metabolic disorders specific to newborn_12m          | No |
| P70_P74_24m | Transitory endocrine and metabolic disorders specific to newborn_24m          | No |
| P70_P74_48m | Transitory endocrine and metabolic disorders specific to newborn_48m          | No |
| P76_P78_6m  | Digestive system disorders of newborn_6m                                      | No |
| P76_P78_12m | Digestive system disorders of newborn_12m                                     | No |
| P76_P78_24m | Digestive system disorders of newborn_24m                                     | No |
| P76_P78_48m | Digestive system disorders of newborn_48m                                     | No |
| P80_P83_6m  | Conditions involving the integument and temperature regulation of newborn_6m  | No |
| P80_P83_12m | Conditions involving the integument and temperature regulation of newborn_12m | No |
| P80_P83_24m | Conditions involving the integument and temperature regulation of newborn_24m | No |
| P80_P83_48m | Conditions involving the integument and temperature regulation of newborn_48m | No |
| P84_P84_6m  | Other problems with newborn_6m                                                | No |
| P84_P84_12m | Other problems with newborn_12m                                               | No |
| P84_P84_24m | Other problems with newborn_24m                                               | No |
| P84_P84_48m | Other problems with newborn_48m                                               | No |
| P90_P96_6m  | Other disorders originating in the perinatal period_6m                        | No |
| P90_P96_12m | Other disorders originating in the perinatal period_12m                       | No |
| P90_P96_24m | Other disorders originating in the perinatal period_24m                       | No |
| P90_P96_48m | Other disorders originating in the perinatal period_48m                       | No |
| Q00_Q07_6m  | Congenital malformations of the nervous system_6m                             | No |
| Q00_Q07_12m | Congenital malformations of the nervous system_12m                            | No |
| Q00_Q07_24m | Congenital malformations of the nervous system_24m                            | No |
| Q00_Q07_48m | Congenital malformations of the nervous system_48m                            | No |

|             |                                                            |     |
|-------------|------------------------------------------------------------|-----|
| Q10_Q18_6m  | Congenital malformations of eye, ear, face and neck_6m     | No  |
| Q10_Q18_12m | Congenital malformations of eye, ear, face and neck_12m    | No  |
| Q10_Q18_24m | Congenital malformations of eye, ear, face and neck_24m    | No  |
| Q10_Q18_48m | Congenital malformations of eye, ear, face and neck_48m    | Yes |
| Q20_Q28_6m  | Congenital malformations of the circulatory system_6m      | No  |
| Q20_Q28_12m | Congenital malformations of the circulatory system_12m     | No  |
| Q20_Q28_24m | Congenital malformations of the circulatory system_24m     | No  |
| Q20_Q28_48m | Congenital malformations of the circulatory system_48m     | Yes |
| Q30_Q34_6m  | Congenital malformations of the respiratory system_6m      | No  |
| Q30_Q34_12m | Congenital malformations of the respiratory system_12m     | No  |
| Q30_Q34_24m | Congenital malformations of the respiratory system_24m     | No  |
| Q30_Q34_48m | Congenital malformations of the respiratory system_48m     | No  |
| Q35_Q37_6m  | Cleft lip and cleft palate_6m                              | No  |
| Q35_Q37_12m | Cleft lip and cleft palate_12m                             | No  |
| Q35_Q37_24m | Cleft lip and cleft palate_24m                             | No  |
| Q35_Q37_48m | Cleft lip and cleft palate_48m                             | No  |
| Q38_Q45_6m  | Other congenital malformations of the digestive system_6m  | No  |
| Q38_Q45_12m | Other congenital malformations of the digestive system_12m | No  |
| Q38_Q45_24m | Other congenital malformations of the digestive system_24m | No  |
| Q38_Q45_48m | Other congenital malformations of the digestive system_48m | Yes |
| Q50_Q56_6m  | Congenital malformations of genital organs_6m              | No  |
| Q50_Q56_12m | Congenital malformations of genital organs_12m             | No  |
| Q50_Q56_24m | Congenital malformations of genital organs_24m             | No  |
| Q50_Q56_48m | Congenital malformations of genital organs_48m             | Yes |
| Q60_Q64_6m  | Congenital malformations of the urinary system_6m          | No  |
| Q60_Q64_12m | Congenital malformations of the urinary system_12m         | No  |
| Q60_Q64_24m | Congenital malformations of the urinary system_24m         | Yes |
| Q60_Q64_48m | Congenital malformations of the urinary system_48m         | Yes |

|             |                                                                             |     |
|-------------|-----------------------------------------------------------------------------|-----|
| Q65_Q79_6m  | Congenital malformations and deformations of the musculoskeletal system_6m  | No  |
| Q65_Q79_12m | Congenital malformations and deformations of the musculoskeletal system_12m | No  |
| Q65_Q79_24m | Congenital malformations and deformations of the musculoskeletal system_24m | Yes |
| Q65_Q79_48m | Congenital malformations and deformations of the musculoskeletal system_48m | Yes |
| Q80_Q89_6m  | Other congenital malformations_6m                                           | No  |
| Q80_Q89_12m | Other congenital malformations_12m                                          | No  |
| Q80_Q89_24m | Other congenital malformations_24m                                          | Yes |
| Q80_Q89_48m | Other congenital malformations_48m                                          | Yes |
| Q90_Q99_6m  | Chromosomal abnormalities, not elsewhere classified_6m                      | No  |
| Q90_Q99_12m | Chromosomal abnormalities, not elsewhere classified_12m                     | No  |
| Q90_Q99_24m | Chromosomal abnormalities, not elsewhere classified_24m                     | No  |
| Q90_Q99_48m | Chromosomal abnormalities, not elsewhere classified_48m                     | No  |
| R00_R09_6m  | Symptoms and signs involving the circulatory and respiratory systems_6m     | Yes |
| R00_R09_12m | Symptoms and signs involving the circulatory and respiratory systems_12m    | Yes |
| R00_R09_24m | Symptoms and signs involving the circulatory and respiratory systems_24m    | Yes |
| R00_R09_48m | Symptoms and signs involving the circulatory and respiratory systems_48m    | Yes |
| R10_R19_6m  | Symptoms and signs involving the digestive system and abdomen_6m            | Yes |
| R10_R19_12m | Symptoms and signs involving the digestive system and abdomen_12m           | Yes |
| R10_R19_24m | Symptoms and signs involving the digestive system and abdomen_24m           | Yes |
| R10_R19_48m | Symptoms and signs involving the digestive system and abdomen_48m           | Yes |
| R20_R23_6m  | Symptoms and signs involving the skin and subcutaneous tissue_6m            | No  |
| R20_R23_12m | Symptoms and signs involving the skin and subcutaneous tissue_12m           | Yes |

|             |                                                                                      |     |
|-------------|--------------------------------------------------------------------------------------|-----|
| R20_R23_24m | Symptoms and signs involving the skin and subcutaneous tissue_24m                    | Yes |
| R20_R23_48m | Symptoms and signs involving the skin and subcutaneous tissue_48m                    | Yes |
| R25_R29_6m  | Symptoms and signs involving the nervous and musculoskeletal systems_6m              | Yes |
| R25_R29_12m | Symptoms and signs involving the nervous and musculoskeletal systems_12m             | Yes |
| R25_R29_24m | Symptoms and signs involving the nervous and musculoskeletal systems_24m             | Yes |
| R25_R29_48m | Symptoms and signs involving the nervous and musculoskeletal systems_48m             | Yes |
| R30_R39_6m  | Symptoms and signs involving the genitourinary system_6m                             | Yes |
| R30_R39_12m | Symptoms and signs involving the genitourinary system_12m                            | Yes |
| R30_R39_24m | Symptoms and signs involving the genitourinary system_24m                            | Yes |
| R30_R39_48m | Symptoms and signs involving the genitourinary system_48m                            | Yes |
| R40_R46_6m  | Symptoms and signs involving cognition, perception, emotional state and behavior_6m  | Yes |
| R40_R46_12m | Symptoms and signs involving cognition, perception, emotional state and behavior_12m | Yes |
| R40_R46_24m | Symptoms and signs involving cognition, perception, emotional state and behavior_24m | Yes |
| R40_R46_48m | Symptoms and signs involving cognition, perception, emotional state and behavior_48m | Yes |
| R47_R49_6m  | Symptoms and signs involving speech and voice_6m                                     | Yes |
| R47_R49_12m | Symptoms and signs involving speech and voice_12m                                    | Yes |
| R47_R49_24m | Symptoms and signs involving speech and voice_24m                                    | Yes |
| R47_R49_48m | Symptoms and signs involving speech and voice_48m                                    | Yes |
| R50_R69_6m  | General symptoms and signs_6m                                                        | Yes |
| R50_R69_12m | General symptoms and signs_12m                                                       | Yes |
| R50_R69_24m | General symptoms and signs_24m                                                       | Yes |
| R50_R69_48m | General symptoms and signs_48m                                                       | Yes |
| R70_R79_6m  | Abnormal findings on examination of blood, without diagnosis_6m                      | Yes |



|             |                                                                                                      |     |
|-------------|------------------------------------------------------------------------------------------------------|-----|
| R70_R79_12m | Abnormal findings on examination of blood, without diagnosis_12m                                     | Yes |
| R70_R79_24m | Abnormal findings on examination of blood, without diagnosis_24m                                     | Yes |
| R70_R79_48m | Abnormal findings on examination of blood, without diagnosis_48m                                     | Yes |
| R80_R82_6m  | Abnormal findings on examination of urine, without diagnosis_6m                                      | No  |
| R80_R82_12m | Abnormal findings on examination of urine, without diagnosis_12m                                     | No  |
| R80_R82_24m | Abnormal findings on examination of urine, without diagnosis_24m                                     | No  |
| R80_R82_48m | Abnormal findings on examination of urine, without diagnosis_48m                                     | Yes |
| R83_R89_6m  | Abnormal findings on examination of other body fluids, substances and tissues, without diagnosis_6m  | No  |
| R83_R89_12m | Abnormal findings on examination of other body fluids, substances and tissues, without diagnosis_12m | No  |
| R83_R89_24m | Abnormal findings on examination of other body fluids, substances and tissues, without diagnosis_24m | No  |
| R83_R89_48m | Abnormal findings on examination of other body fluids, substances and tissues, without diagnosis_48m | Yes |
| R90_R94_6m  | Abnormal findings on diagnostic imaging and in function studies, without diagnosis_6m                | Yes |
| R90_R94_12m | Abnormal findings on diagnostic imaging and in function studies, without diagnosis_12m               | Yes |
| R90_R94_24m | Abnormal findings on diagnostic imaging and in function studies, without diagnosis_24m               | Yes |
| R90_R94_48m | Abnormal findings on diagnostic imaging and in function studies, without diagnosis_48m               | Yes |
| R97_R97_6m  | Abnormal tumor markers_6m                                                                            | No  |
| R97_R97_12m | Abnormal tumor markers_12m                                                                           | No  |
| R97_R97_24m | Abnormal tumor markers_24m                                                                           | No  |
| R97_R97_48m | Abnormal tumor markers_48m                                                                           | No  |
| R99_R99_6m  | Ill-defined and unknown cause of mortality_6m                                                        | Yes |
| R99_R99_12m | Ill-defined and unknown cause of mortality_12m                                                       | Yes |
| R99_R99_24m | Ill-defined and unknown cause of mortality_24m                                                       | Yes |
| R99_R99_48m | Ill-defined and unknown cause of mortality_48m                                                       | Yes |

|             |                                                                                     |     |
|-------------|-------------------------------------------------------------------------------------|-----|
| S00_S09_6m  | Injuries to the head_6m                                                             | Yes |
| S00_S09_12m | Injuries to the head_12m                                                            | Yes |
| S00_S09_24m | Injuries to the head_24m                                                            | Yes |
| S00_S09_48m | Injuries to the head_48m                                                            | Yes |
| S10_S19_6m  | Injuries to the neck_6m                                                             | Yes |
| S10_S19_12m | Injuries to the neck_12m                                                            | Yes |
| S10_S19_24m | Injuries to the neck_24m                                                            | Yes |
| S10_S19_48m | Injuries to the neck_48m                                                            | Yes |
| S20_S29_6m  | Injuries to the thorax_6m                                                           | Yes |
| S20_S29_12m | Injuries to the thorax_12m                                                          | Yes |
| S20_S29_24m | Injuries to the thorax_24m                                                          | Yes |
| S20_S29_48m | Injuries to the thorax_48m                                                          | Yes |
| S30_S39_6m  | Injuries to the abdomen, lower back, lumbar spine, pelvis and external genitals_6m  | Yes |
| S30_S39_12m | Injuries to the abdomen, lower back, lumbar spine, pelvis and external genitals_12m | Yes |
| S30_S39_24m | Injuries to the abdomen, lower back, lumbar spine, pelvis and external genitals_24m | Yes |
| S30_S39_48m | Injuries to the abdomen, lower back, lumbar spine, pelvis and external genitals_48m | Yes |
| S40_S49_6m  | Injuries to the shoulder and upper arm_6m                                           | Yes |
| S40_S49_12m | Injuries to the shoulder and upper arm_12m                                          | Yes |
| S40_S49_24m | Injuries to the shoulder and upper arm_24m                                          | Yes |
| S40_S49_48m | Injuries to the shoulder and upper arm_48m                                          | Yes |
| S50_S59_6m  | Injuries to the elbow and forearm_6m                                                | Yes |
| S50_S59_12m | Injuries to the elbow and forearm_12m                                               | Yes |
| S50_S59_24m | Injuries to the elbow and forearm_24m                                               | Yes |
| S50_S59_48m | Injuries to the elbow and forearm_48m                                               | Yes |
| S60_S69_6m  | Injuries to the wrist, hand and fingers_6m                                          | Yes |
| S60_S69_12m | Injuries to the wrist, hand and fingers_12m                                         | Yes |

|             |                                                                      |     |
|-------------|----------------------------------------------------------------------|-----|
| S60_S69_24m | Injuries to the wrist, hand and fingers_24m                          | Yes |
| S60_S69_48m | Injuries to the wrist, hand and fingers_48m                          | Yes |
| S70_S79_6m  | Injuries to the hip and thigh_6m                                     | Yes |
| S70_S79_12m | Injuries to the hip and thigh_12m                                    | Yes |
| S70_S79_24m | Injuries to the hip and thigh_24m                                    | Yes |
| S70_S79_48m | Injuries to the hip and thigh_48m                                    | Yes |
| S80_S89_6m  | Injuries to the knee and lower leg_6m                                | Yes |
| S80_S89_12m | Injuries to the knee and lower leg_12m                               | Yes |
| S80_S89_24m | Injuries to the knee and lower leg_24m                               | Yes |
| S80_S89_48m | Injuries to the knee and lower leg_48m                               | Yes |
| S90_S99_6m  | Injuries to the ankle and foot_6m                                    | Yes |
| S90_S99_12m | Injuries to the ankle and foot_12m                                   | Yes |
| S90_S99_24m | Injuries to the ankle and foot_24m                                   | Yes |
| S90_S99_48m | Injuries to the ankle and foot_48m                                   | Yes |
| T07_T07_6m  | Injuries involving multiple body regions_6m                          | Yes |
| T07_T07_12m | Injuries involving multiple body regions_12m                         | Yes |
| T07_T07_24m | Injuries involving multiple body regions_24m                         | Yes |
| T07_T07_48m | Injuries involving multiple body regions_48m                         | Yes |
| T14_T14_6m  | Injury of unspecified body region_6m                                 | Yes |
| T14_T14_12m | Injury of unspecified body region_12m                                | Yes |
| T14_T14_24m | Injury of unspecified body region_24m                                | Yes |
| T14_T14_48m | Injury of unspecified body region_48m                                | Yes |
| T15_T19_6m  | Effects of foreign body entering through natural orifice_6m          | Yes |
| T15_T19_12m | Effects of foreign body entering through natural orifice_12m         | Yes |
| T15_T19_24m | Effects of foreign body entering through natural orifice_24m         | Yes |
| T15_T19_48m | Effects of foreign body entering through natural orifice_48m         | Yes |
| T20_T25_6m  | Burns and corrosions of external body surface, specified by site_6m  | Yes |
| T20_T25_12m | Burns and corrosions of external body surface, specified by site_12m | Yes |

|             |                                                                                                     |     |
|-------------|-----------------------------------------------------------------------------------------------------|-----|
| T20_T25_24m | Burns and corrosions of external body surface, specified by site_24m                                | Yes |
| T20_T25_48m | Burns and corrosions of external body surface, specified by site_48m                                | Yes |
| T26_T28_6m  | Burns and corrosions confined to eye and internal organs_6m                                         | Yes |
| T26_T28_12m | Burns and corrosions confined to eye and internal organs_12m                                        | Yes |
| T26_T28_24m | Burns and corrosions confined to eye and internal organs_24m                                        | Yes |
| T26_T28_48m | Burns and corrosions confined to eye and internal organs_48m                                        | Yes |
| T30_T32_6m  | Burns and corrosions of multiple and unspecified body regions_6m                                    | No  |
| T30_T32_12m | Burns and corrosions of multiple and unspecified body regions_12m                                   | No  |
| T30_T32_24m | Burns and corrosions of multiple and unspecified body regions_24m                                   | Yes |
| T30_T32_48m | Burns and corrosions of multiple and unspecified body regions_48m                                   | Yes |
| T33_T34_6m  | Frostbite_6m                                                                                        | No  |
| T33_T34_12m | Frostbite_12m                                                                                       | No  |
| T33_T34_24m | Frostbite_24m                                                                                       | No  |
| T33_T34_48m | Frostbite_48m                                                                                       | No  |
| T36_T50_6m  | Poisoning by, adverse effect of and underdosing of drugs, medicaments and biological substances_6m  | Yes |
| T36_T50_12m | Poisoning by, adverse effect of and underdosing of drugs, medicaments and biological substances_12m | Yes |
| T36_T50_24m | Poisoning by, adverse effect of and underdosing of drugs, medicaments and biological substances_24m | Yes |
| T36_T50_48m | Poisoning by, adverse effect of and underdosing of drugs, medicaments and biological substances_48m | Yes |
| T51_T65_6m  | Toxic effects of substances chiefly nonmedicinal as to source_6m                                    | Yes |
| T51_T65_12m | Toxic effects of substances chiefly nonmedicinal as to source_12m                                   | Yes |
| T51_T65_24m | Toxic effects of substances chiefly nonmedicinal as to source_24m                                   | Yes |
| T51_T65_48m | Toxic effects of substances chiefly nonmedicinal as to source_48m                                   | Yes |
| T66_T78_6m  | Other and unspecified effects of external causes_6m                                                 | Yes |
| T66_T78_12m | Other and unspecified effects of external causes_12m                                                | Yes |
| T66_T78_24m | Other and unspecified effects of external causes_24m                                                | Yes |
| T66_T78_48m | Other and unspecified effects of external causes_48m                                                | Yes |

|             |                                                                          |     |
|-------------|--------------------------------------------------------------------------|-----|
| T79_T79_6m  | Certain early complications of trauma_6m                                 | Yes |
| T79_T79_12m | Certain early complications of trauma_12m                                | Yes |
| T79_T79_24m | Certain early complications of trauma_24m                                | Yes |
| T79_T79_48m | Certain early complications of trauma_48m                                | Yes |
| T80_T88_6m  | Complications of surgical and medical care, not elsewhere classified_6m  | Yes |
| T80_T88_12m | Complications of surgical and medical care, not elsewhere classified_12m | Yes |
| T80_T88_24m | Complications of surgical and medical care, not elsewhere classified_24m | Yes |
| T80_T88_48m | Complications of surgical and medical care, not elsewhere classified_48m | Yes |
| V00_V09_6m  | Placental characteristics_6m                                             | No  |
| V00_V09_12m | Placental characteristics_12m                                            | No  |
| V00_V09_24m | Placental characteristics_24m                                            | No  |
| V00_V09_48m | Placental characteristics_48m                                            | No  |
| V10_V19_6m  | Placental characteristics_6m                                             | No  |
| V10_V19_12m | Placental characteristics_12m                                            | No  |
| V10_V19_24m | Placental characteristics_24m                                            | No  |
| V10_V19_48m | Placental characteristics_48m                                            | No  |
| V20_V29_6m  | Placental characteristics_6m                                             | No  |
| V20_V29_12m | Placental characteristics_12m                                            | No  |
| V20_V29_24m | Placental characteristics_24m                                            | No  |
| V20_V29_48m | Placental characteristics_48m                                            | No  |
| V30_V39_6m  | Placental characteristics_6m                                             | No  |
| V30_V39_12m | Placental characteristics_12m                                            | No  |
| V30_V39_24m | Placental characteristics_24m                                            | No  |
| V30_V39_48m | Placental characteristics_48m                                            | No  |
| V40_V49_6m  | Placental characteristics_6m                                             | No  |
| V40_V49_12m | Placental characteristics_12m                                            | No  |

|             |                               |    |
|-------------|-------------------------------|----|
| V40_V49_24m | Placental characteristics_24m | No |
| V40_V49_48m | Placental characteristics_48m | No |
| V50_V59_6m  | Placental characteristics_6m  | No |
| V50_V59_12m | Placental characteristics_12m | No |
| V50_V59_24m | Placental characteristics_24m | No |
| V50_V59_48m | Placental characteristics_48m | No |
| V60_V69_6m  | Placental characteristics_6m  | No |
| V60_V69_12m | Placental characteristics_12m | No |
| V60_V69_24m | Placental characteristics_24m | No |
| V60_V69_48m | Placental characteristics_48m | No |
| V70_V79_6m  | Placental characteristics_6m  | No |
| V70_V79_12m | Placental characteristics_12m | No |
| V70_V79_24m | Placental characteristics_24m | No |
| V70_V79_48m | Placental characteristics_48m | No |
| V80_V89_6m  | Placental characteristics_6m  | No |
| V80_V89_12m | Placental characteristics_12m | No |
| V80_V89_24m | Placental characteristics_24m | No |
| V80_V89_48m | Placental characteristics_48m | No |
| V90_V94_6m  | Placental characteristics_6m  | No |
| V90_V94_12m | Placental characteristics_12m | No |
| V90_V94_24m | Placental characteristics_24m | No |
| V90_V94_48m | Placental characteristics_48m | No |
| V95_V97_6m  | Placental characteristics_6m  | No |
| V95_V97_12m | Placental characteristics_12m | No |
| V95_V97_24m | Placental characteristics_24m | No |
| V95_V97_48m | Placental characteristics_48m | No |
| V98_V99_6m  | Placental characteristics_6m  | No |
| V98_V99_12m | Placental characteristics_12m | No |

|             |                                                                                              |    |
|-------------|----------------------------------------------------------------------------------------------|----|
| V98_V99_24m | Placental characteristics_24m                                                                | No |
| V98_V99_48m | Placental characteristics_48m                                                                | No |
| W00_W19_6m  | Slipping, tripping, stumbling and falls_6m                                                   | No |
| W00_W19_12m | Slipping, tripping, stumbling and falls_12m                                                  | No |
| W00_W19_24m | Slipping, tripping, stumbling and falls_24m                                                  | No |
| W00_W19_48m | Slipping, tripping, stumbling and falls_48m                                                  | No |
| W20_W49_6m  | Exposure to inanimate mechanical forces_6m                                                   | No |
| W20_W49_12m | Exposure to inanimate mechanical forces_12m                                                  | No |
| W20_W49_24m | Exposure to inanimate mechanical forces_24m                                                  | No |
| W20_W49_48m | Exposure to inanimate mechanical forces_48m                                                  | No |
| W50_W64_6m  | Exposure to animate mechanical forces_6m                                                     | No |
| W50_W64_12m | Exposure to animate mechanical forces_12m                                                    | No |
| W50_W64_24m | Exposure to animate mechanical forces_24m                                                    | No |
| W50_W64_48m | Exposure to animate mechanical forces_48m                                                    | No |
| W65_W74_6m  | Accidental non-transport drowning and submersion_6m                                          | No |
| W65_W74_12m | Accidental non-transport drowning and submersion_12m                                         | No |
| W65_W74_24m | Accidental non-transport drowning and submersion_24m                                         | No |
| W65_W74_48m | Accidental non-transport drowning and submersion_48m                                         | No |
| W85_W99_6m  | Exposure to electric current, radiation and extreme ambient air temperature and pressure_6m  | No |
| W85_W99_12m | Exposure to electric current, radiation and extreme ambient air temperature and pressure_12m | No |
| W85_W99_24m | Exposure to electric current, radiation and extreme ambient air temperature and pressure_24m | No |
| W85_W99_48m | Exposure to electric current, radiation and extreme ambient air temperature and pressure_48m | No |
| X00_X08_6m  | Exposure to smoke, fire and flames_6m                                                        | No |
| X00_X08_12m | Exposure to smoke, fire and flames_12m                                                       | No |
| X00_X08_24m | Exposure to smoke, fire and flames_24m                                                       | No |
| X00_X08_48m | Exposure to smoke, fire and flames_48m                                                       | No |

|             |                                                        |     |
|-------------|--------------------------------------------------------|-----|
| X10_X19_6m  | Contact with heat and hot substances_6m                | No  |
| X10_X19_12m | Contact with heat and hot substances_12m               | No  |
| X10_X19_24m | Contact with heat and hot substances_24m               | No  |
| X10_X19_48m | Contact with heat and hot substances_48m               | No  |
| X30_X39_6m  | Exposure to forces of nature_6m                        | No  |
| X30_X39_12m | Exposure to forces of nature_12m                       | No  |
| X30_X39_24m | Exposure to forces of nature_24m                       | No  |
| X30_X39_48m | Exposure to forces of nature_48m                       | No  |
| X50_X50_6m  | Overexertion and strenuous or repetitive movements_6m  | No  |
| X50_X50_12m | Overexertion and strenuous or repetitive movements_12m | No  |
| X50_X50_24m | Overexertion and strenuous or repetitive movements_24m | No  |
| X50_X50_48m | Overexertion and strenuous or repetitive movements_48m | No  |
| X52_X58_6m  | Accidental exposure to other specified factors_6m      | No  |
| X52_X58_12m | Accidental exposure to other specified factors_12m     | No  |
| X52_X58_24m | Accidental exposure to other specified factors_24m     | No  |
| X52_X58_48m | Accidental exposure to other specified factors_48m     | No  |
| X71_X83_6m  | Intentional self-harm_6m                               | Yes |
| X71_X83_12m | Intentional self-harm_12m                              | Yes |
| X71_X83_24m | Intentional self-harm_24m                              | Yes |
| X71_X83_48m | Intentional self-harm_48m                              | Yes |
| X92_Y09_6m  | Assault_6m                                             | No  |
| X92_Y09_12m | Assault_12m                                            | No  |
| X92_Y09_24m | Assault_24m                                            | No  |
| X92_Y09_48m | Assault_48m                                            | No  |
| Y21_Y33_6m  | Event of undetermined intent_6m                        | No  |
| Y21_Y33_12m | Event of undetermined intent_12m                       | No  |
| Y21_Y33_24m | Event of undetermined intent_24m                       | No  |
| Y21_Y33_48m | Event of undetermined intent_48m                       | No  |



|             |                                                                                                                                                                                    |    |
|-------------|------------------------------------------------------------------------------------------------------------------------------------------------------------------------------------|----|
| Y35_Y38_6m  | Legal intervention, operations of war, military operations, and terrorism_6m                                                                                                       | No |
| Y35_Y38_12m | Legal intervention, operations of war, military operations, and terrorism_12m                                                                                                      | No |
| Y35_Y38_24m | Legal intervention, operations of war, military operations, and terrorism_24m                                                                                                      | No |
| Y35_Y38_48m | Legal intervention, operations of war, military operations, and terrorism_48m                                                                                                      | No |
| Y62_Y69_6m  | Misadventures to patients during surgical and medical care_6m                                                                                                                      | No |
| Y62_Y69_12m | Misadventures to patients during surgical and medical care_12m                                                                                                                     | No |
| Y62_Y69_24m | Misadventures to patients during surgical and medical care_24m                                                                                                                     | No |
| Y62_Y69_48m | Misadventures to patients during surgical and medical care_48m                                                                                                                     | No |
| Y70_Y82_6m  | Medical devices associated with adverse incidents in diagnostic and therapeutic use_6m                                                                                             | No |
| Y70_Y82_12m | Medical devices associated with adverse incidents in diagnostic and therapeutic use_12m                                                                                            | No |
| Y70_Y82_24m | Medical devices associated with adverse incidents in diagnostic and therapeutic use_24m                                                                                            | No |
| Y70_Y82_48m | Medical devices associated with adverse incidents in diagnostic and therapeutic use_48m                                                                                            | No |
| Y83_Y84_6m  | Surgical and other medical procedures as the cause of abnormal reaction of the patient, or of later complication, without mention of misadventure at the time of the procedure_6m  | No |
| Y83_Y84_12m | Surgical and other medical procedures as the cause of abnormal reaction of the patient, or of later complication, without mention of misadventure at the time of the procedure_12m | No |
| Y83_Y84_24m | Surgical and other medical procedures as the cause of abnormal reaction of the patient, or of later complication, without mention of misadventure at the time of the procedure_24m | No |
| Y83_Y84_48m | Surgical and other medical procedures as the cause of abnormal reaction of the patient, or of later complication, without mention of misadventure at the time of the procedure_48m | No |
| Y90_Y99_6m  | Supplementary factors related to causes of morbidity classified elsewhere_6m                                                                                                       | No |

|             |                                                                               |     |
|-------------|-------------------------------------------------------------------------------|-----|
| Y90_Y99_12m | Supplementary factors related to causes of morbidity classified elsewhere_12m | No  |
| Y90_Y99_24m | Supplementary factors related to causes of morbidity classified elsewhere_24m | No  |
| Y90_Y99_48m | Supplementary factors related to causes of morbidity classified elsewhere_48m | No  |
| Z00_Z13_6m  | Persons encountering health services for examinations_6m                      | Yes |
| Z00_Z13_12m | Persons encountering health services for examinations_12m                     | Yes |
| Z00_Z13_24m | Persons encountering health services for examinations_24m                     | Yes |
| Z00_Z13_48m | Persons encountering health services for examinations_48m                     | Yes |
| Z14_Z15_6m  | Genetic carrier and genetic susceptibility to disease_6m                      | No  |
| Z14_Z15_12m | Genetic carrier and genetic susceptibility to disease_12m                     | No  |
| Z14_Z15_24m | Genetic carrier and genetic susceptibility to disease_24m                     | No  |
| Z14_Z15_48m | Genetic carrier and genetic susceptibility to disease_48m                     | No  |
| Z16_Z16_6m  | Resistance to antimicrobial drugs_6m                                          | No  |
| Z16_Z16_12m | Resistance to antimicrobial drugs_12m                                         | No  |
| Z16_Z16_24m | Resistance to antimicrobial drugs_24m                                         | No  |
| Z16_Z16_48m | Resistance to antimicrobial drugs_48m                                         | No  |
| Z17_Z17_6m  | Estrogen receptor status_6m                                                   | No  |
| Z17_Z17_12m | Estrogen receptor status_12m                                                  | No  |
| Z17_Z17_24m | Estrogen receptor status_24m                                                  | No  |
| Z17_Z17_48m | Estrogen receptor status_48m                                                  | No  |
| Z18_Z18_6m  | Retained foreign body fragments_6m                                            | No  |
| Z18_Z18_12m | Retained foreign body fragments_12m                                           | No  |
| Z18_Z18_24m | Retained foreign body fragments_24m                                           | No  |
| Z18_Z18_48m | Retained foreign body fragments_48m                                           | No  |
| Z19_Z19_6m  | Hormone sensitivity malignancy status_6m                                      | No  |
| Z19_Z19_12m | Hormone sensitivity malignancy status_12m                                     | No  |
| Z19_Z19_24m | Hormone sensitivity malignancy status_24m                                     | No  |

|             |                                                                                                   |     |
|-------------|---------------------------------------------------------------------------------------------------|-----|
| Z19_Z19_48m | Hormone sensitivity malignancy status_48m                                                         | No  |
| Z20_Z29_6m  | Persons with potential health hazards related to communicable diseases_6m                         | No  |
| Z20_Z29_12m | Persons with potential health hazards related to communicable diseases_12m                        | Yes |
| Z20_Z29_24m | Persons with potential health hazards related to communicable diseases_24m                        | Yes |
| Z20_Z29_48m | Persons with potential health hazards related to communicable diseases_48m                        | Yes |
| Z30_Z39_6m  | Persons encountering health services in circumstances related to reproduction_6m                  | Yes |
| Z30_Z39_12m | Persons encountering health services in circumstances related to reproduction_12m                 | Yes |
| Z30_Z39_24m | Persons encountering health services in circumstances related to reproduction_24m                 | Yes |
| Z30_Z39_48m | Persons encountering health services in circumstances related to reproduction_48m                 | Yes |
| Z40_Z53_6m  | Encounters for other specific health care_6m                                                      | Yes |
| Z40_Z53_12m | Encounters for other specific health care_12m                                                     | Yes |
| Z40_Z53_24m | Encounters for other specific health care_24m                                                     | Yes |
| Z40_Z53_48m | Encounters for other specific health care_48m                                                     | Yes |
| Z55_Z65_6m  | Persons with potential health hazards related to socioeconomic and psychosocial circumstances_6m  | Yes |
| Z55_Z65_12m | Persons with potential health hazards related to socioeconomic and psychosocial circumstances_12m | Yes |
| Z55_Z65_24m | Persons with potential health hazards related to socioeconomic and psychosocial circumstances_24m | Yes |
| Z55_Z65_48m | Persons with potential health hazards related to socioeconomic and psychosocial circumstances_48m | Yes |
| Z66_Z66_6m  | Do not resuscitate status_6m                                                                      | No  |
| Z66_Z66_12m | Do not resuscitate status_12m                                                                     | No  |
| Z66_Z66_24m | Do not resuscitate status_24m                                                                     | No  |
| Z66_Z66_48m | Do not resuscitate status_48m                                                                     | No  |

|             |                                                                                                                                   |     |
|-------------|-----------------------------------------------------------------------------------------------------------------------------------|-----|
| Z67_Z67_6m  | Blood type_6m                                                                                                                     | No  |
| Z67_Z67_12m | Blood type_12m                                                                                                                    | No  |
| Z67_Z67_24m | Blood type_24m                                                                                                                    | No  |
| Z67_Z67_48m | Blood type_48m                                                                                                                    | No  |
| Z68_Z68_6m  | Body mass index (BMI)_6m                                                                                                          | No  |
| Z68_Z68_12m | Body mass index (BMI)_12m                                                                                                         | No  |
| Z68_Z68_24m | Body mass index (BMI)_24m                                                                                                         | No  |
| Z68_Z68_48m | Body mass index (BMI)_48m                                                                                                         | No  |
| Z69_Z76_6m  | Persons encountering health services in other circumstances_6m                                                                    | Yes |
| Z69_Z76_12m | Persons encountering health services in other circumstances_12m                                                                   | Yes |
| Z69_Z76_24m | Persons encountering health services in other circumstances_24m                                                                   | Yes |
| Z69_Z76_48m | Persons encountering health services in other circumstances_48m                                                                   | Yes |
| Z77_Z99_6m  | Persons with potential health hazards related to family and personal history and certain conditions influencing health status_6m  | Yes |
| Z77_Z99_12m | Persons with potential health hazards related to family and personal history and certain conditions influencing health status_12m | Yes |
| Z77_Z99_24m | Persons with potential health hazards related to family and personal history and certain conditions influencing health status_24m | Yes |
| Z77_Z99_48m | Persons with potential health hazards related to family and personal history and certain conditions influencing health status_48m | Yes |
| F01_6m      | Vascular dementia_6m                                                                                                              | Yes |
| F01_12m     | Vascular dementia_12m                                                                                                             | Yes |
| F01_24m     | Vascular dementia_24m                                                                                                             | Yes |
| F01_48m     | Vascular dementia_48m                                                                                                             | Yes |
| F02_6m      | Dementia in other diseases classified elsewhere_6m                                                                                | Yes |
| F02_12m     | Dementia in other diseases classified elsewhere_12m                                                                               | Yes |
| F02_24m     | Dementia in other diseases classified elsewhere_24m                                                                               | Yes |
| F02_48m     | Dementia in other diseases classified elsewhere_48m                                                                               | Yes |
| F03_6m      | Unspecified dementia_6m                                                                                                           | Yes |
| F03_12m     | Unspecified dementia_12m                                                                                                          | Yes |

|         |                                                                               |     |
|---------|-------------------------------------------------------------------------------|-----|
| F03_24m | Unspecified dementia_24m                                                      | Yes |
| F03_48m | Unspecified dementia_48m                                                      | Yes |
| F04_6m  | Amnestic disorder due to known physiological condition_6m                     | No  |
| F04_12m | Amnestic disorder due to known physiological condition_12m                    | No  |
| F04_24m | Amnestic disorder due to known physiological condition_24m                    | No  |
| F04_48m | Amnestic disorder due to known physiological condition_48m                    | No  |
| F05_6m  | Delirium due to known physiological condition_6m                              | Yes |
| F05_12m | Delirium due to known physiological condition_12m                             | Yes |
| F05_24m | Delirium due to known physiological condition_24m                             | Yes |
| F05_48m | Delirium due to known physiological condition_48m                             | Yes |
| F06_6m  | Other mental disorders due to known physiological condition_6m                | Yes |
| F06_12m | Other mental disorders due to known physiological condition_12m               | Yes |
| F06_24m | Other mental disorders due to known physiological condition_24m               | Yes |
| F06_48m | Other mental disorders due to known physiological condition_48m               | Yes |
| F07_6m  | Personality and behavioral disorders due to known physiological condition_6m  | Yes |
| F07_12m | Personality and behavioral disorders due to known physiological condition_12m | Yes |
| F07_24m | Personality and behavioral disorders due to known physiological condition_24m | Yes |
| F07_48m | Personality and behavioral disorders due to known physiological condition_48m | Yes |
| F09_6m  | Unspecified mental disorder due to known physiological condition_6m           | Yes |
| F09_12m | Unspecified mental disorder due to known physiological condition_12m          | Yes |
| F09_24m | Unspecified mental disorder due to known physiological condition_24m          | Yes |
| F09_48m | Unspecified mental disorder due to known physiological condition_48m          | Yes |
| F10_6m  | Alcohol related disorders_6m                                                  | Yes |
| F10_12m | Alcohol related disorders_12m                                                 | Yes |
| F10_24m | Alcohol related disorders_24m                                                 | Yes |
| F10_48m | Alcohol related disorders_48m                                                 | Yes |

|         |                                                         |     |
|---------|---------------------------------------------------------|-----|
| F11_6m  | Opioid related disorders_6m                             | Yes |
| F11_12m | Opioid related disorders_12m                            | Yes |
| F11_24m | Opioid related disorders_24m                            | Yes |
| F11_48m | Opioid related disorders_48m                            | Yes |
| F12_6m  | Cannabis related disorders_6m                           | Yes |
| F12_12m | Cannabis related disorders_12m                          | Yes |
| F12_24m | Cannabis related disorders_24m                          | Yes |
| F12_48m | Cannabis related disorders_48m                          | Yes |
| F13_6m  | Sedative, hypnotic, or anxiolytic related disorders_6m  | Yes |
| F13_12m | Sedative, hypnotic, or anxiolytic related disorders_12m | Yes |
| F13_24m | Sedative, hypnotic, or anxiolytic related disorders_24m | Yes |
| F13_48m | Sedative, hypnotic, or anxiolytic related disorders_48m | Yes |
| F14_6m  | Cocaine related disorders_6m                            | Yes |
| F14_12m | Cocaine related disorders_12m                           | Yes |
| F14_24m | Cocaine related disorders_24m                           | Yes |
| F14_48m | Cocaine related disorders_48m                           | Yes |
| F15_6m  | Other stimulant related disorders_6m                    | Yes |
| F15_12m | Other stimulant related disorders_12m                   | Yes |
| F15_24m | Other stimulant related disorders_24m                   | Yes |
| F15_48m | Other stimulant related disorders_48m                   | Yes |
| F16_6m  | Hallucinogen related disorders_6m                       | No  |
| F16_12m | Hallucinogen related disorders_12m                      | No  |
| F16_24m | Hallucinogen related disorders_24m                      | No  |
| F16_48m | Hallucinogen related disorders_48m                      | No  |
| F17_6m  | Nicotine dependence_6m                                  | Yes |
| F17_12m | Nicotine dependence_12m                                 | Yes |
| F17_24m | Nicotine dependence_24m                                 | Yes |
| F17_48m | Nicotine dependence_48m                                 | Yes |

|         |                                                    |     |
|---------|----------------------------------------------------|-----|
| F18_6m  | Inhalant related disorders_6m                      | No  |
| F18_12m | Inhalant related disorders_12m                     | No  |
| F18_24m | Inhalant related disorders_24m                     | No  |
| F18_48m | Inhalant related disorders_48m                     | No  |
| F19_6m  | Other psychoactive substance related disorders_6m  | Yes |
| F19_12m | Other psychoactive substance related disorders_12m | Yes |
| F19_24m | Other psychoactive substance related disorders_24m | Yes |
| F19_48m | Other psychoactive substance related disorders_48m | Yes |
| F20_6m  | Schizophrenia_6m                                   | Yes |
| F20_12m | Schizophrenia_12m                                  | Yes |
| F20_24m | Schizophrenia_24m                                  | Yes |
| F20_48m | Schizophrenia_48m                                  | Yes |
| F21_6m  | Schizotypal disorder_6m                            | Yes |
| F21_12m | Schizotypal disorder_12m                           | Yes |
| F21_24m | Schizotypal disorder_24m                           | Yes |
| F21_48m | Schizotypal disorder_48m                           | Yes |
| F22_6m  | Delusional disorders_6m                            | Yes |
| F22_12m | Delusional disorders_12m                           | Yes |
| F22_24m | Delusional disorders_24m                           | Yes |
| F22_48m | Delusional disorders_48m                           | Yes |
| F23_6m  | Brief psychotic disorder_6m                        | Yes |
| F23_12m | Brief psychotic disorder_12m                       | Yes |
| F23_24m | Brief psychotic disorder_24m                       | Yes |
| F23_48m | Brief psychotic disorder_48m                       | Yes |
| F24_6m  | Shared psychotic disorder_6m                       | No  |
| F24_12m | Shared psychotic disorder_12m                      | No  |
| F24_24m | Shared psychotic disorder_24m                      | No  |
| F24_48m | Shared psychotic disorder_48m                      | No  |

|         |                                                                                      |     |
|---------|--------------------------------------------------------------------------------------|-----|
| F25_6m  | Schizoaffective disorders_6m                                                         | Yes |
| F25_12m | Schizoaffective disorders_12m                                                        | Yes |
| F25_24m | Schizoaffective disorders_24m                                                        | Yes |
| F25_48m | Schizoaffective disorders_48m                                                        | Yes |
| F28_6m  | Other psychotic disorder not due to a substance or known physiological condition_6m  | No  |
| F28_12m | Other psychotic disorder not due to a substance or known physiological condition_12m | No  |
| F28_24m | Other psychotic disorder not due to a substance or known physiological condition_24m | No  |
| F28_48m | Other psychotic disorder not due to a substance or known physiological condition_48m | Yes |
| F29_6m  | Unspecified psychosis not due to a substance or known physiological condition_6m     | Yes |
| F29_12m | Unspecified psychosis not due to a substance or known physiological condition_12m    | Yes |
| F29_24m | Unspecified psychosis not due to a substance or known physiological condition_24m    | Yes |
| F29_48m | Unspecified psychosis not due to a substance or known physiological condition_48m    | Yes |
| F30_6m  | Manic episode_6m                                                                     | Yes |
| F30_12m | Manic episode_12m                                                                    | Yes |
| F30_24m | Manic episode_24m                                                                    | Yes |
| F30_48m | Manic episode_48m                                                                    | Yes |
| F31_6m  | Bipolar disorder_6m                                                                  | Yes |
| F31_12m | Bipolar disorder_12m                                                                 | Yes |
| F31_24m | Bipolar disorder_24m                                                                 | Yes |
| F31_48m | Bipolar disorder_48m                                                                 | Yes |
| F32_6m  | Major depressive disorder, single episode_6m                                         | Yes |
| F32_12m | Major depressive disorder, single episode_12m                                        | Yes |
| F32_24m | Major depressive disorder, single episode_24m                                        | Yes |



|         |                                                         |     |
|---------|---------------------------------------------------------|-----|
| F32_48m | Major depressive disorder, single episode_48m           | Yes |
| F33_6m  | Major depressive disorder, recurrent_6m                 | Yes |
| F33_12m | Major depressive disorder, recurrent_12m                | Yes |
| F33_24m | Major depressive disorder, recurrent_24m                | Yes |
| F33_48m | Major depressive disorder, recurrent_48m                | Yes |
| F34_6m  | Persistent mood [affective] disorders_6m                | Yes |
| F34_12m | Persistent mood [affective] disorders_12m               | Yes |
| F34_24m | Persistent mood [affective] disorders_24m               | Yes |
| F34_48m | Persistent mood [affective] disorders_48m               | Yes |
| F39_6m  | Unspecified mood [affective] disorder_6m                | Yes |
| F39_12m | Unspecified mood [affective] disorder_12m               | Yes |
| F39_24m | Unspecified mood [affective] disorder_24m               | Yes |
| F39_48m | Unspecified mood [affective] disorder_48m               | Yes |
| F40_6m  | Phobic anxiety disorders_6m                             | No  |
| F40_12m | Phobic anxiety disorders_12m                            | Yes |
| F40_24m | Phobic anxiety disorders_24m                            | Yes |
| F40_48m | Phobic anxiety disorders_48m                            | Yes |
| F41_6m  | Other anxiety disorders_6m                              | Yes |
| F41_12m | Other anxiety disorders_12m                             | Yes |
| F41_24m | Other anxiety disorders_24m                             | Yes |
| F41_48m | Other anxiety disorders_48m                             | Yes |
| F42_6m  | Obsessive-compulsive disorder_6m                        | Yes |
| F42_12m | Obsessive-compulsive disorder_12m                       | Yes |
| F42_24m | Obsessive-compulsive disorder_24m                       | Yes |
| F42_48m | Obsessive-compulsive disorder_48m                       | Yes |
| F43_6m  | Reaction to severe stress, and adjustment disorders_6m  | Yes |
| F43_12m | Reaction to severe stress, and adjustment disorders_12m | Yes |
| F43_24m | Reaction to severe stress, and adjustment disorders_24m | Yes |

|         |                                                                                |     |
|---------|--------------------------------------------------------------------------------|-----|
| F43_48m | Reaction to severe stress, and adjustment disorders_48m                        | Yes |
| F44_6m  | Dissociative and conversion disorders_6m                                       | No  |
| F44_12m | Dissociative and conversion disorders_12m                                      | No  |
| F44_24m | Dissociative and conversion disorders_24m                                      | Yes |
| F44_48m | Dissociative and conversion disorders_48m                                      | Yes |
| F45_6m  | Somatoform disorders_6m                                                        | Yes |
| F45_12m | Somatoform disorders_12m                                                       | Yes |
| F45_24m | Somatoform disorders_24m                                                       | Yes |
| F45_48m | Somatoform disorders_48m                                                       | Yes |
| F48_6m  | Other nonpsychotic mental disorders_6m                                         | No  |
| F48_12m | Other nonpsychotic mental disorders_12m                                        | Yes |
| F48_24m | Other nonpsychotic mental disorders_24m                                        | Yes |
| F48_48m | Other nonpsychotic mental disorders_48m                                        | Yes |
| F50_6m  | Eating disorders_6m                                                            | Yes |
| F50_12m | Eating disorders_12m                                                           | Yes |
| F50_24m | Eating disorders_24m                                                           | Yes |
| F50_48m | Eating disorders_48m                                                           | Yes |
| F51_6m  | Sleep disorders not due to a substance or known physiological condition_6m     | No  |
| F51_12m | Sleep disorders not due to a substance or known physiological condition_12m    | No  |
| F51_24m | Sleep disorders not due to a substance or known physiological condition_24m    | No  |
| F51_48m | Sleep disorders not due to a substance or known physiological condition_48m    | No  |
| F52_6m  | Sexual dysfunction not due to a substance or known physiological condition_6m  | No  |
| F52_12m | Sexual dysfunction not due to a substance or known physiological condition_12m | No  |
| F52_24m | Sexual dysfunction not due to a substance or known physiological condition_24m | No  |

|         |                                                                                                      |     |
|---------|------------------------------------------------------------------------------------------------------|-----|
| F52_48m | Sexual dysfunction not due to a substance or known physiological condition_48m                       | No  |
| F53_6m  | Puerperal psychosis_6m                                                                               | No  |
| F53_12m | Puerperal psychosis_12m                                                                              | No  |
| F53_24m | Puerperal psychosis_24m                                                                              | No  |
| F53_48m | Puerperal psychosis_48m                                                                              | No  |
| F54_6m  | Psychological and behavioral factors associated with disorders or diseases classified elsewhere_6m   | No  |
| F54_12m | Psychological and behavioral factors associated with disorders or diseases classified elsewhere_12m  | No  |
| F54_24m | Psychological and behavioral factors associated with disorders or diseases classified elsewhere_24m  | No  |
| F54_48m | Psychological and behavioral factors associated with disorders or diseases classified elsewhere_48m  | No  |
| F55_6m  | Abuse of non-psychoactive substances_6m                                                              | No  |
| F55_12m | Abuse of non-psychoactive substances_12m                                                             | No  |
| F55_24m | Abuse of non-psychoactive substances_24m                                                             | No  |
| F55_48m | Abuse of non-psychoactive substances_48m                                                             | Yes |
| F59_6m  | Unspecified behavioral syndromes associated with physiological disturbances and physical factors_6m  | No  |
| F59_12m | Unspecified behavioral syndromes associated with physiological disturbances and physical factors_12m | No  |
| F59_24m | Unspecified behavioral syndromes associated with physiological disturbances and physical factors_24m | No  |
| F59_48m | Unspecified behavioral syndromes associated with physiological disturbances and physical factors_48m | No  |
| F60_6m  | Specific personality disorders_6m                                                                    | Yes |
| F60_12m | Specific personality disorders_12m                                                                   | Yes |
| F60_24m | Specific personality disorders_24m                                                                   | Yes |
| F60_48m | Specific personality disorders_48m                                                                   | Yes |
| F63_6m  | Impulse disorders_6m                                                                                 | No  |
| F63_12m | Impulse disorders_12m                                                                                | No  |

|         |                                                            |     |
|---------|------------------------------------------------------------|-----|
| F63_24m | Impulse disorders_24m                                      | No  |
| F63_48m | Impulse disorders_48m                                      | No  |
| F64_6m  | Gender identity disorders_6m                               | No  |
| F64_12m | Gender identity disorders_12m                              | No  |
| F64_24m | Gender identity disorders_24m                              | No  |
| F64_48m | Gender identity disorders_48m                              | No  |
| F65_6m  | Paraphilias_6m                                             | No  |
| F65_12m | Paraphilias_12m                                            | No  |
| F65_24m | Paraphilias_24m                                            | No  |
| F65_48m | Paraphilias_48m                                            | No  |
| F66_6m  | Other sexual disorders_6m                                  | No  |
| F66_12m | Other sexual disorders_12m                                 | No  |
| F66_24m | Other sexual disorders_24m                                 | No  |
| F66_48m | Other sexual disorders_48m                                 | No  |
| F68_6m  | Other disorders of adult personality and behavior_6m       | No  |
| F68_12m | Other disorders of adult personality and behavior_12m      | No  |
| F68_24m | Other disorders of adult personality and behavior_24m      | No  |
| F68_48m | Other disorders of adult personality and behavior_48m      | No  |
| F69_6m  | Unspecified disorder of adult personality and behavior_6m  | No  |
| F69_12m | Unspecified disorder of adult personality and behavior_12m | No  |
| F69_24m | Unspecified disorder of adult personality and behavior_24m | Yes |
| F69_48m | Unspecified disorder of adult personality and behavior_48m | Yes |
| F70_6m  | Mild intellectual disabilities_6m                          | No  |
| F70_12m | Mild intellectual disabilities_12m                         | Yes |
| F70_24m | Mild intellectual disabilities_24m                         | Yes |
| F70_48m | Mild intellectual disabilities_48m                         | Yes |
| F71_6m  | Moderate intellectual disabilities_6m                      | No  |
| F71_12m | Moderate intellectual disabilities_12m                     | No  |

|         |                                                             |    |
|---------|-------------------------------------------------------------|----|
| F71_24m | Moderate intellectual disabilities_24m                      | No |
| F71_48m | Moderate intellectual disabilities_48m                      | No |
| F72_6m  | Severe intellectual disabilities_6m                         | No |
| F72_12m | Severe intellectual disabilities_12m                        | No |
| F72_24m | Severe intellectual disabilities_24m                        | No |
| F72_48m | Severe intellectual disabilities_48m                        | No |
| F73_6m  | Profound intellectual disabilities_6m                       | No |
| F73_12m | Profound intellectual disabilities_12m                      | No |
| F73_24m | Profound intellectual disabilities_24m                      | No |
| F73_48m | Profound intellectual disabilities_48m                      | No |
| F78_6m  | Other intellectual disabilities_6m                          | No |
| F78_12m | Other intellectual disabilities_12m                         | No |
| F78_24m | Other intellectual disabilities_24m                         | No |
| F78_48m | Other intellectual disabilities_48m                         | No |
| F79_6m  | Unspecified intellectual disabilities_6m                    | No |
| F79_12m | Unspecified intellectual disabilities_12m                   | No |
| F79_24m | Unspecified intellectual disabilities_24m                   | No |
| F79_48m | Unspecified intellectual disabilities_48m                   | No |
| F80_6m  | Specific developmental disorders of speech and language_6m  | No |
| F80_12m | Specific developmental disorders of speech and language_12m | No |
| F80_24m | Specific developmental disorders of speech and language_24m | No |
| F80_48m | Specific developmental disorders of speech and language_48m | No |
| F81_6m  | Specific developmental disorders of scholastic skills_6m    | No |
| F81_12m | Specific developmental disorders of scholastic skills_12m   | No |
| F81_24m | Specific developmental disorders of scholastic skills_24m   | No |
| F81_48m | Specific developmental disorders of scholastic skills_48m   | No |
| F82_6m  | Specific developmental disorder of motor function_6m        | No |
| F82_12m | Specific developmental disorder of motor function_12m       | No |

|         |                                                                                     |     |
|---------|-------------------------------------------------------------------------------------|-----|
| F82_24m | Specific developmental disorder of motor function_24m                               | No  |
| F82_48m | Specific developmental disorder of motor function_48m                               | No  |
| F84_6m  | Pervasive developmental disorders_6m                                                | Yes |
| F84_12m | Pervasive developmental disorders_12m                                               | Yes |
| F84_24m | Pervasive developmental disorders_24m                                               | Yes |
| F84_48m | Pervasive developmental disorders_48m                                               | Yes |
| F88_6m  | Other disorders of psychological development_6m                                     | No  |
| F88_12m | Other disorders of psychological development_12m                                    | No  |
| F88_24m | Other disorders of psychological development_24m                                    | No  |
| F88_48m | Other disorders of psychological development_48m                                    | No  |
| F89_6m  | Unspecified disorder of psychological development_6m                                | No  |
| F89_12m | Unspecified disorder of psychological development_12m                               | No  |
| F89_24m | Unspecified disorder of psychological development_24m                               | No  |
| F89_48m | Unspecified disorder of psychological development_48m                               | No  |
| F90_6m  | Attention-deficit hyperactivity disorders_6m                                        | Yes |
| F90_12m | Attention-deficit hyperactivity disorders_12m                                       | Yes |
| F90_24m | Attention-deficit hyperactivity disorders_24m                                       | Yes |
| F90_48m | Attention-deficit hyperactivity disorders_48m                                       | Yes |
| F91_6m  | Conduct disorders_6m                                                                | No  |
| F91_12m | Conduct disorders_12m                                                               | No  |
| F91_24m | Conduct disorders_24m                                                               | No  |
| F91_48m | Conduct disorders_48m                                                               | No  |
| F93_6m  | Emotional disorders with onset specific to childhood_6m                             | No  |
| F93_12m | Emotional disorders with onset specific to childhood_12m                            | No  |
| F93_24m | Emotional disorders with onset specific to childhood_24m                            | No  |
| F93_48m | Emotional disorders with onset specific to childhood_48m                            | No  |
| F94_6m  | Disorders of social functioning with onset specific to childhood and adolescence_6m | No  |

|         |                                                                                                        |     |
|---------|--------------------------------------------------------------------------------------------------------|-----|
| F94_12m | Disorders of social functioning with onset specific to childhood and adolescence_12m                   | No  |
| F94_24m | Disorders of social functioning with onset specific to childhood and adolescence_24m                   | No  |
| F94_48m | Disorders of social functioning with onset specific to childhood and adolescence_48m                   | No  |
| F95_6m  | Tic disorder_6m                                                                                        | No  |
| F95_12m | Tic disorder_12m                                                                                       | No  |
| F95_24m | Tic disorder_24m                                                                                       | No  |
| F95_48m | Tic disorder_48m                                                                                       | No  |
| F98_6m  | Other behavioral and emotional disorders with onset usually occurring in childhood and adolescence_6m  | No  |
| F98_12m | Other behavioral and emotional disorders with onset usually occurring in childhood and adolescence_12m | No  |
| F98_24m | Other behavioral and emotional disorders with onset usually occurring in childhood and adolescence_24m | No  |
| F98_48m | Other behavioral and emotional disorders with onset usually occurring in childhood and adolescence_48m | No  |
| F99_6m  | Mental disorder, not otherwise specified_6m                                                            | Yes |
| F99_12m | Mental disorder, not otherwise specified_12m                                                           | Yes |
| F99_24m | Mental disorder, not otherwise specified_24m                                                           | Yes |
| F99_48m | Mental disorder, not otherwise specified_48m                                                           | Yes |
| A_6m    | Nervous system surgeries_6m                                                                            | Yes |
| A_12m   | Nervous system surgeries_12m                                                                           | Yes |
| A_24m   | Nervous system surgeries_24m                                                                           | Yes |
| A_48m   | Nervous system surgeries_48m                                                                           | Yes |
| B_6m    | Endocrine system surgeries_6m                                                                          | Yes |
| B_12m   | Endocrine system surgeries_12m                                                                         | Yes |
| B_24m   | Endocrine system surgeries_24m                                                                         | Yes |
| B_48m   | Endocrine system surgeries_48m                                                                         | Yes |
| C_6m    | Eye and adjacent structure surgery_6m                                                                  | Yes |

|       |                                                                                      |     |
|-------|--------------------------------------------------------------------------------------|-----|
| C_12m | Eye and adjacent structure surgery_12m                                               | Yes |
| C_24m | Eye and adjacent structure surgery_24m                                               | Yes |
| C_48m | Eye and adjacent structure surgery_48m                                               | Yes |
| D_6m  | Ear, nose and larynx surgeries_6m                                                    | Yes |
| D_12m | Ear, nose and larynx surgeries_12m                                                   | Yes |
| D_24m | Ear, nose and larynx surgeries_24m                                                   | Yes |
| D_48m | Ear, nose and larynx surgeries_48m                                                   | Yes |
| E_6m  | Teeth, jaw, mouth and pharynx surgeries_6m                                           | Yes |
| E_12m | Teeth, jaw, mouth and pharynx surgeries_12m                                          | Yes |
| E_24m | Teeth, jaw, mouth and pharynx surgeries_24m                                          | Yes |
| E_48m | Teeth, jaw, mouth and pharynx surgeries_48m                                          | Yes |
| F_6m  | Heart and major thoracic vessels_6m                                                  | Yes |
| F_12m | Heart and major thoracic vessels_12m                                                 | Yes |
| F_24m | Heart and major thoracic vessels_24m                                                 | Yes |
| F_48m | Heart and major thoracic vessels_48m                                                 | Yes |
| G_6m  | Chest wall, pleura, mediastinum, diaphragm, trachea, bronchus and lung surgeries_6m  | Yes |
| G_12m | Chest wall, pleura, mediastinum, diaphragm, trachea, bronchus and lung surgeries_12m | Yes |
| G_24m | Chest wall, pleura, mediastinum, diaphragm, trachea, bronchus and lung surgeries_24m | Yes |
| G_48m | Chest wall, pleura, mediastinum, diaphragm, trachea, bronchus and lung surgeries_48m | Yes |
| H_6m  | Mammary gland surgeries_6m                                                           | Yes |
| H_12m | Mammary gland surgeries_12m                                                          | Yes |
| H_24m | Mammary gland surgeries_24m                                                          | Yes |
| H_48m | Mammary gland surgeries_48m                                                          | Yes |
| J_6m  | Digestive system and spleen surgeries_6m                                             | Yes |
| J_12m | Digestive system and spleen surgeries_12m                                            | Yes |
| J_24m | Digestive system and spleen surgeries_24m                                            | Yes |



|       |                                                                             |     |
|-------|-----------------------------------------------------------------------------|-----|
| J_48m | Digestive system and spleen surgeries_48m                                   | Yes |
| K_6m  | Urinary system, male genital organs and retroperitoneal space surgeries_6m  | Yes |
| K_12m | Urinary system, male genital organs and retroperitoneal space surgeries_12m | Yes |
| K_24m | Urinary system, male genital organs and retroperitoneal space surgeries_24m | Yes |
| K_48m | Urinary system, male genital organs and retroperitoneal space surgeries_48m | Yes |
| L_6m  | Female genital organ surgeries_6m                                           | Yes |
| L_12m | Female genital organ surgeries_12m                                          | Yes |
| L_24m | Female genital organ surgeries_24m                                          | Yes |
| L_48m | Female genital organ surgeries_48m                                          | Yes |
| M_6m  | Obstetric procedures_6m                                                     | No  |
| M_12m | Obstetric procedures_12m                                                    | Yes |
| M_24m | Obstetric procedures_24m                                                    | Yes |
| M_48m | Obstetric procedures_48m                                                    | Yes |
| N_6m  | Musculoskeletal system surgeries_6m                                         | Yes |
| N_12m | Musculoskeletal system surgeries_12m                                        | Yes |
| N_24m | Musculoskeletal system surgeries_24m                                        | Yes |
| N_48m | Musculoskeletal system surgeries_48m                                        | Yes |
| P_6m  | Peripheral vessels and lymphatic system surgeries_6m                        | Yes |
| P_12m | Peripheral vessels and lymphatic system surgeries_12m                       | Yes |
| P_24m | Peripheral vessels and lymphatic system surgeries_24m                       | Yes |
| P_48m | Peripheral vessels and lymphatic system surgeries_48m                       | Yes |
| Q_6m  | Skin surgeries_6m                                                           | Yes |
| Q_12m | Skin surgeries_12m                                                          | Yes |
| Q_24m | Skin surgeries_24m                                                          | Yes |
| Q_48m | Skin surgeries_48m                                                          | Yes |
| T_6m  | Minor surgical procedures_6m                                                | Yes |

|          |                                                                         |     |
|----------|-------------------------------------------------------------------------|-----|
| T_12m    | Minor surgical procedures_12m                                           | Yes |
| T_24m    | Minor surgical procedures_24m                                           | Yes |
| T_48m    | Minor surgical procedures_48m                                           | Yes |
| U_6m     | Transluminal endoscopy_6m                                               | Yes |
| U_12m    | Transluminal endoscopy_12m                                              | Yes |
| U_24m    | Transluminal endoscopy_24m                                              | Yes |
| U_48m    | Transluminal endoscopy_48m                                              | Yes |
| X_6m     | Investigative procedures connected with surgery_6m                      | No  |
| X_12m    | Investigative procedures connected with surgery_12m                     | No  |
| X_24m    | Investigative procedures connected with surgery_24m                     | No  |
| X_48m    | Investigative procedures connected with surgery_48m                     | No  |
| A01A_6m  | Stomatological preparations_6m                                          | Yes |
| A01A_12m | Stomatological preparations_12m                                         | Yes |
| A01A_24m | Stomatological preparations_24m                                         | Yes |
| A01A_48m | Stomatological preparations_48m                                         | Yes |
| A02A_6m  | Antacids_6m                                                             | Yes |
| A02A_12m | Antacids_12m                                                            | Yes |
| A02A_24m | Antacids_24m                                                            | Yes |
| A02A_48m | Antacids_48m                                                            | Yes |
| A02B_6m  | Drugs for peptic ulcer and gastro-oesophageal reflux disease (GORD)_6m  | Yes |
| A02B_12m | Drugs for peptic ulcer and gastro-oesophageal reflux disease (GORD)_12m | Yes |
| A02B_24m | Drugs for peptic ulcer and gastro-oesophageal reflux disease (GORD)_24m | Yes |
| A02B_48m | Drugs for peptic ulcer and gastro-oesophageal reflux disease (GORD)_48m | Yes |
| A02X_6m  | Other drugs for acid related disorders_6m                               | No  |
| A02X_12m | Other drugs for acid related disorders_12m                              | No  |
| A02X_24m | Other drugs for acid related disorders_24m                              | No  |

|          |                                                                         |     |
|----------|-------------------------------------------------------------------------|-----|
| A02X_48m | Other drugs for acid related disorders_48m                              | No  |
| A03A_6m  | Drugs for functional gastrointestinal disorders_6m                      | Yes |
| A03A_12m | Drugs for functional gastrointestinal disorders_12m                     | Yes |
| A03A_24m | Drugs for functional gastrointestinal disorders_24m                     | Yes |
| A03A_48m | Drugs for functional gastrointestinal disorders_48m                     | Yes |
| A03B_6m  | Belladonna and derivatives, plain_6m                                    | Yes |
| A03B_12m | Belladonna and derivatives, plain_12m                                   | Yes |
| A03B_24m | Belladonna and derivatives, plain_24m                                   | Yes |
| A03B_48m | Belladonna and derivatives, plain_48m                                   | Yes |
| A03C_6m  | Antispasmodics in combination with psycholeptics_6m                     | No  |
| A03C_12m | Antispasmodics in combination with psycholeptics_12m                    | No  |
| A03C_24m | Antispasmodics in combination with psycholeptics_24m                    | No  |
| A03C_48m | Antispasmodics in combination with psycholeptics_48m                    | No  |
| A03D_6m  | Antispasmodics in combination with analgesics_6m                        | No  |
| A03D_12m | Antispasmodics in combination with analgesics_12m                       | No  |
| A03D_24m | Antispasmodics in combination with analgesics_24m                       | No  |
| A03D_48m | Antispasmodics in combination with analgesics_48m                       | No  |
| A03E_6m  | Antispasmodics and anticholinergics in combination with other drugs_6m  | No  |
| A03E_12m | Antispasmodics and anticholinergics in combination with other drugs_12m | No  |
| A03E_24m | Antispasmodics and anticholinergics in combination with other drugs_24m | No  |
| A03E_48m | Antispasmodics and anticholinergics in combination with other drugs_48m | No  |
| A03F_6m  | Propulsives_6m                                                          | Yes |
| A03F_12m | Propulsives_12m                                                         | Yes |
| A03F_24m | Propulsives_24m                                                         | Yes |
| A03F_48m | Propulsives_48m                                                         | Yes |
| A04A_6m  | Antiemetics and antiemetics_6m                                          | Yes |

|          |                                                           |     |
|----------|-----------------------------------------------------------|-----|
| A04A_12m | Antiemetics and antinauseants_12m                         | Yes |
| A04A_24m | Antiemetics and antinauseants_24m                         | Yes |
| A04A_48m | Antiemetics and antinauseants_48m                         | Yes |
| A05A_6m  | Bile therapy_6m                                           | No  |
| A05A_12m | Bile therapy_12m                                          | No  |
| A05A_24m | Bile therapy_24m                                          | No  |
| A05A_48m | Bile therapy_48m                                          | No  |
| A05B_6m  | Liver therapy, lipotropics_6m                             | No  |
| A05B_12m | Liver therapy, lipotropics_12m                            | No  |
| A05B_24m | Liver therapy, lipotropics_24m                            | No  |
| A05B_48m | Liver therapy, lipotropics_48m                            | No  |
| A05C_6m  | Drugs for bile therapy and lipotropics in combination_6m  | No  |
| A05C_12m | Drugs for bile therapy and lipotropics in combination_12m | No  |
| A05C_24m | Drugs for bile therapy and lipotropics in combination_24m | No  |
| A05C_48m | Drugs for bile therapy and lipotropics in combination_48m | No  |
| A06A_6m  | Drugs for constipation_6m                                 | Yes |
| A06A_12m | Drugs for constipation_12m                                | Yes |
| A06A_24m | Drugs for constipation_24m                                | Yes |
| A06A_48m | Drugs for constipation_48m                                | Yes |
| A07A_6m  | Intestinal anti-infectives_6m                             | Yes |
| A07A_12m | Intestinal anti-infectives_12m                            | Yes |
| A07A_24m | Intestinal anti-infectives_24m                            | Yes |
| A07A_48m | Intestinal anti-infectives_48m                            | Yes |
| A07B_6m  | Intestinal adsorbents_6m                                  | No  |
| A07B_12m | Intestinal adsorbents_12m                                 | No  |
| A07B_24m | Intestinal adsorbents_24m                                 | No  |
| A07B_48m | Intestinal adsorbents_48m                                 | No  |
| A07C_6m  | Electrolytes with carbohydrates_6m                        | No  |

|          |                                                       |     |
|----------|-------------------------------------------------------|-----|
| A07C_12m | Electrolytes with carbohydrates_12m                   | No  |
| A07C_24m | Electrolytes with carbohydrates_24m                   | No  |
| A07C_48m | Electrolytes with carbohydrates_48m                   | No  |
| A07D_6m  | Antipropulsives_6m                                    | Yes |
| A07D_12m | Antipropulsives_12m                                   | Yes |
| A07D_24m | Antipropulsives_24m                                   | Yes |
| A07D_48m | Antipropulsives_48m                                   | Yes |
| A07E_6m  | Intestinal anti-inflammatory agents_6m                | No  |
| A07E_12m | Intestinal anti-inflammatory agents_12m               | No  |
| A07E_24m | Intestinal anti-inflammatory agents_24m               | No  |
| A07E_48m | Intestinal anti-inflammatory agents_48m               | Yes |
| A07F_6m  | Antidiarrheal micro-organisms_6m                      | Yes |
| A07F_12m | Antidiarrheal micro-organisms_12m                     | Yes |
| A07F_24m | Antidiarrheal micro-organisms_24m                     | Yes |
| A07F_48m | Antidiarrheal micro-organisms_48m                     | Yes |
| A07X_6m  | Other antidiarrheals_6m                               | No  |
| A07X_12m | Other antidiarrheals_12m                              | No  |
| A07X_24m | Other antidiarrheals_24m                              | No  |
| A07X_48m | Other antidiarrheals_48m                              | No  |
| A08A_6m  | Antiobesity preparations, excluding diet products_6m  | Yes |
| A08A_12m | Antiobesity preparations, excluding diet products_12m | Yes |
| A08A_24m | Antiobesity preparations, excluding diet products_24m | Yes |
| A08A_48m | Antiobesity preparations, excluding diet products_48m | Yes |
| A09A_6m  | Digestives, including enzymes_6m                      | Yes |
| A09A_12m | Digestives, including enzymes_12m                     | Yes |
| A09A_24m | Digestives, including enzymes_24m                     | Yes |
| A09A_48m | Digestives, including enzymes_48m                     | Yes |
| A10A_6m  | Insulins and analogues_6m                             | Yes |

|          |                                                                 |     |
|----------|-----------------------------------------------------------------|-----|
| A10A_12m | Insulins and analogues_12m                                      | Yes |
| A10A_24m | Insulins and analogues_24m                                      | Yes |
| A10A_48m | Insulins and analogues_48m                                      | Yes |
| A10B_6m  | Blood glucose lowering drugs, excluding insulins_6m             | Yes |
| A10B_12m | Blood glucose lowering drugs, excluding insulins_12m            | Yes |
| A10B_24m | Blood glucose lowering drugs, excluding insulins_24m            | Yes |
| A10B_48m | Blood glucose lowering drugs, excluding insulins_48m            | Yes |
| A10X_6m  | Other drugs used in diabetes_6m                                 | No  |
| A10X_12m | Other drugs used in diabetes_12m                                | No  |
| A10X_24m | Other drugs used in diabetes_24m                                | No  |
| A10X_48m | Other drugs used in diabetes_48m                                | No  |
| A11A_6m  | Multivitamins, combinations_6m                                  | No  |
| A11A_12m | Multivitamins, combinations_12m                                 | No  |
| A11A_24m | Multivitamins, combinations_24m                                 | No  |
| A11A_48m | Multivitamins, combinations_48m                                 | No  |
| A11B_6m  | Multivitamins, plain_6m                                         | No  |
| A11B_12m | Multivitamins, plain_12m                                        | No  |
| A11B_24m | Multivitamins, plain_24m                                        | No  |
| A11B_48m | Multivitamins, plain_48m                                        | No  |
| A11C_6m  | Vitamin A and D, including combinations of the two_6m           | Yes |
| A11C_12m | Vitamin A and D, including combinations of the two_12m          | Yes |
| A11C_24m | Vitamin A and D, including combinations of the two_24m          | Yes |
| A11C_48m | Vitamin A and D, including combinations of the two_48m          | Yes |
| A11D_6m  | Vitamin B1, plain and in combination with vitamin B6and B12_6m  | No  |
| A11D_12m | Vitamin B1, plain and in combination with vitamin B6and B12_12m | No  |
| A11D_24m | Vitamin B1, plain and in combination with vitamin B6and B12_24m | No  |
| A11D_48m | Vitamin B1, plain and in combination with vitamin B6and B12_48m | No  |
| A11E_6m  | Vitamin B-complex, including combinations_6m                    | Yes |

|          |                                                       |     |
|----------|-------------------------------------------------------|-----|
| A11E_12m | Vitamin B-complex, including combinations_12m         | Yes |
| A11E_24m | Vitamin B-complex, including combinations_24m         | Yes |
| A11E_48m | Vitamin B-complex, including combinations_48m         | Yes |
| A11G_6m  | Ascorbic acid (vitamin C), including combinations_6m  | No  |
| A11G_12m | Ascorbic acid (vitamin C), including combinations_12m | No  |
| A11G_24m | Ascorbic acid (vitamin C), including combinations_24m | No  |
| A11G_48m | Ascorbic acid (vitamin C), including combinations_48m | No  |
| A11H_6m  | Other plain vitamin preparations_6m                   | No  |
| A11H_12m | Other plain vitamin preparations_12m                  | No  |
| A11H_24m | Other plain vitamin preparations_24m                  | No  |
| A11H_48m | Other plain vitamin preparations_48m                  | No  |
| A11J_6m  | Other vitamin products, combinations_6m               | No  |
| A11J_12m | Other vitamin products, combinations_12m              | No  |
| A11J_24m | Other vitamin products, combinations_24m              | No  |
| A11J_48m | Other vitamin products, combinations_48m              | No  |
| A12A_6m  | Calcium_6m                                            | Yes |
| A12A_12m | Calcium_12m                                           | Yes |
| A12A_24m | Calcium_24m                                           | Yes |
| A12A_48m | Calcium_48m                                           | Yes |
| A12B_6m  | Potassium_6m                                          | Yes |
| A12B_12m | Potassium_12m                                         | Yes |
| A12B_24m | Potassium_24m                                         | Yes |
| A12B_48m | Potassium_48m                                         | Yes |
| A12C_6m  | Other mineral supplements_6m                          | No  |
| A12C_12m | Other mineral supplements_12m                         | No  |
| A12C_24m | Other mineral supplements_24m                         | No  |
| A12C_48m | Other mineral supplements_48m                         | No  |
| A14A_6m  | Anabolic steroids_6m                                  | No  |

|          |                                                    |     |
|----------|----------------------------------------------------|-----|
| A14A_12m | Anabolic steroids_12m                              | No  |
| A14A_24m | Anabolic steroids_24m                              | No  |
| A14A_48m | Anabolic steroids_48m                              | No  |
| A14B_6m  | Other anabolic agents_6m                           | No  |
| A14B_12m | Other anabolic agents_12m                          | No  |
| A14B_24m | Other anabolic agents_24m                          | No  |
| A14B_48m | Other anabolic agents_48m                          | No  |
| A16A_6m  | Other alimentary tract and metabolism products_6m  | No  |
| A16A_12m | Other alimentary tract and metabolism products_12m | No  |
| A16A_24m | Other alimentary tract and metabolism products_24m | No  |
| A16A_48m | Other alimentary tract and metabolism products_48m | No  |
| B01A_6m  | Antithrombotic agents_6m                           | Yes |
| B01A_12m | Antithrombotic agents_12m                          | Yes |
| B01A_24m | Antithrombotic agents_24m                          | Yes |
| B01A_48m | Antithrombotic agents_48m                          | Yes |
| B02A_6m  | Antifibrinolytics_6m                               | No  |
| B02A_12m | Antifibrinolytics_12m                              | No  |
| B02A_24m | Antifibrinolytics_24m                              | No  |
| B02A_48m | Antifibrinolytics_48m                              | No  |
| B02B_6m  | Vitamin K and other hemostatics_6m                 | Yes |
| B02B_12m | Vitamin K and other hemostatics_12m                | Yes |
| B02B_24m | Vitamin K and other hemostatics_24m                | Yes |
| B02B_48m | Vitamin K and other hemostatics_48m                | Yes |
| B03A_6m  | Iron preparations_6m                               | Yes |
| B03A_12m | Iron preparations_12m                              | Yes |
| B03A_24m | Iron preparations_24m                              | Yes |
| B03A_48m | Iron preparations_48m                              | Yes |
| B03B_6m  | Vitamin B12and folic acid_6m                       | Yes |



|          |                                    |     |
|----------|------------------------------------|-----|
| B03B_12m | Vitamin B12and folic acid_12m      | Yes |
| B03B_24m | Vitamin B12and folic acid_24m      | Yes |
| B03B_48m | Vitamin B12and folic acid_48m      | Yes |
| B03X_6m  | Other antianemic preparations_6m   | No  |
| B03X_12m | Other antianemic preparations_12m  | No  |
| B03X_24m | Other antianemic preparations_24m  | No  |
| B03X_48m | Other antianemic preparations_48m  | No  |
| B05A_6m  | Blood and related products_6m      | No  |
| B05A_12m | Blood and related products_12m     | No  |
| B05A_24m | Blood and related products_24m     | No  |
| B05A_48m | Blood and related products_48m     | No  |
| B05B_6m  | I.v. solutions_6m                  | No  |
| B05B_12m | I.v. solutions_12m                 | No  |
| B05B_24m | I.v. solutions_24m                 | No  |
| B05B_48m | I.v. solutions_48m                 | No  |
| B05C_6m  | Irrigating solutions_6m            | No  |
| B05C_12m | Irrigating solutions_12m           | No  |
| B05C_24m | Irrigating solutions_24m           | No  |
| B05C_48m | Irrigating solutions_48m           | No  |
| B05D_6m  | Peritoneal dialytics_6m            | No  |
| B05D_12m | Peritoneal dialytics_12m           | No  |
| B05D_24m | Peritoneal dialytics_24m           | No  |
| B05D_48m | Peritoneal dialytics_48m           | No  |
| B05X_6m  | I.v. solution additives_6m         | No  |
| B05X_12m | I.v. solution additives_12m        | No  |
| B05X_24m | I.v. solution additives_24m        | No  |
| B05X_48m | I.v. solution additives_48m        | No  |
| B05Z_6m  | Hemodialytics and hemofiltrates_6m | No  |

|          |                                                     |     |
|----------|-----------------------------------------------------|-----|
| B05Z_12m | Hemodialytics and hemofiltrates_12m                 | No  |
| B05Z_24m | Hemodialytics and hemofiltrates_24m                 | No  |
| B05Z_48m | Hemodialytics and hemofiltrates_48m                 | No  |
| B06A_6m  | Other hematological agents_6m                       | No  |
| B06A_12m | Other hematological agents_12m                      | No  |
| B06A_24m | Other hematological agents_24m                      | No  |
| B06A_48m | Other hematological agents_48m                      | No  |
| C01A_6m  | Cardiac glycosides_6m                               | Yes |
| C01A_12m | Cardiac glycosides_12m                              | Yes |
| C01A_24m | Cardiac glycosides_24m                              | Yes |
| C01A_48m | Cardiac glycosides_48m                              | Yes |
| C01B_6m  | Antiarrhythmics, class I and III_6m                 | Yes |
| C01B_12m | Antiarrhythmics, class I and III_12m                | Yes |
| C01B_24m | Antiarrhythmics, class I and III_24m                | Yes |
| C01B_48m | Antiarrhythmics, class I and III_48m                | Yes |
| C01C_6m  | Cardiac stimulants excluding cardiac glycosides_6m  | No  |
| C01C_12m | Cardiac stimulants excluding cardiac glycosides_12m | Yes |
| C01C_24m | Cardiac stimulants excluding cardiac glycosides_24m | Yes |
| C01C_48m | Cardiac stimulants excluding cardiac glycosides_48m | Yes |
| C01D_6m  | Vasodilators used in cardiac diseases_6m            | Yes |
| C01D_12m | Vasodilators used in cardiac diseases_12m           | Yes |
| C01D_24m | Vasodilators used in cardiac diseases_24m           | Yes |
| C01D_48m | Vasodilators used in cardiac diseases_48m           | Yes |
| C01E_6m  | Other cardiac preparations_6m                       | Yes |
| C01E_12m | Other cardiac preparations_12m                      | Yes |
| C01E_24m | Other cardiac preparations_24m                      | Yes |
| C01E_48m | Other cardiac preparations_48m                      | Yes |
| C02A_6m  | Antiadrenergic agents, centrally acting_6m          | Yes |

|          |                                                        |     |
|----------|--------------------------------------------------------|-----|
| C02A_12m | Antiadrenergic agents, centrally acting_12m            | No  |
| C02A_24m | Antiadrenergic agents, centrally acting_24m            | Yes |
| C02A_48m | Antiadrenergic agents, centrally acting_48m            | No  |
| C02B_6m  | Antiadrenergic agents, ganglion-blocking_6m            | No  |
| C02B_12m | Antiadrenergic agents, ganglion-blocking_12m           | No  |
| C02B_24m | Antiadrenergic agents, ganglion-blocking_24m           | No  |
| C02B_48m | Antiadrenergic agents, ganglion-blocking_48m           | No  |
| C02C_6m  | Antiadrenergic agents, peripherally acting_6m          | Yes |
| C02C_12m | Antiadrenergic agents, peripherally acting_12m         | Yes |
| C02C_24m | Antiadrenergic agents, peripherally acting_24m         | Yes |
| C02C_48m | Antiadrenergic agents, peripherally acting_48m         | Yes |
| C02D_6m  | Arteriolar smooth muscle, agents acting on_6m          | No  |
| C02D_12m | Arteriolar smooth muscle, agents acting on_12m         | No  |
| C02D_24m | Arteriolar smooth muscle, agents acting on_24m         | No  |
| C02D_48m | Arteriolar smooth muscle, agents acting on_48m         | No  |
| C02K_6m  | Other antihypertensives_6m                             | No  |
| C02K_12m | Other antihypertensives_12m                            | No  |
| C02K_24m | Other antihypertensives_24m                            | No  |
| C02K_48m | Other antihypertensives_48m                            | No  |
| C02L_6m  | Antihypertensives and diuretics in combination_6m      | No  |
| C02L_12m | Antihypertensives and diuretics in combination_12m     | No  |
| C02L_24m | Antihypertensives and diuretics in combination_24m     | No  |
| C02L_48m | Antihypertensives and diuretics in combination_48m     | No  |
| C02N_6m  | Combinations of antihypertensives in ATC-group C02_6m  | No  |
| C02N_12m | Combinations of antihypertensives in ATC-group C02_12m | No  |
| C02N_24m | Combinations of antihypertensives in ATC-group C02_24m | No  |
| C02N_48m | Combinations of antihypertensives in ATC-group C02_48m | No  |
| C03A_6m  | Low-ceiling diuretics, thiazides_6m                    | Yes |

|          |                                                           |     |
|----------|-----------------------------------------------------------|-----|
| C03A_12m | Low-ceiling diuretics, thiazides_12m                      | Yes |
| C03A_24m | Low-ceiling diuretics, thiazides_24m                      | Yes |
| C03A_48m | Low-ceiling diuretics, thiazides_48m                      | Yes |
| C03B_6m  | Low-ceiling diuretics, excluding thiazides_6m             | Yes |
| C03B_12m | Low-ceiling diuretics, excluding thiazides_12m            | Yes |
| C03B_24m | Low-ceiling diuretics, excluding thiazides_24m            | No  |
| C03B_48m | Low-ceiling diuretics, excluding thiazides_48m            | No  |
| C03C_6m  | High-ceiling diuretics_6m                                 | Yes |
| C03C_12m | High-ceiling diuretics_12m                                | Yes |
| C03C_24m | High-ceiling diuretics_24m                                | Yes |
| C03C_48m | High-ceiling diuretics_48m                                | Yes |
| C03D_6m  | Potassium-sparing agents_6m                               | Yes |
| C03D_12m | Potassium-sparing agents_12m                              | Yes |
| C03D_24m | Potassium-sparing agents_24m                              | Yes |
| C03D_48m | Potassium-sparing agents_48m                              | Yes |
| C03E_6m  | Diuretics and potassium-sparing agents in combination_6m  | No  |
| C03E_12m | Diuretics and potassium-sparing agents in combination_12m | Yes |
| C03E_24m | Diuretics and potassium-sparing agents in combination_24m | Yes |
| C03E_48m | Diuretics and potassium-sparing agents in combination_48m | Yes |
| C03X_6m  | Other diuretics_6m                                        | No  |
| C03X_12m | Other diuretics_12m                                       | No  |
| C03X_24m | Other diuretics_24m                                       | No  |
| C03X_48m | Other diuretics_48m                                       | No  |
| C04A_6m  | Peripheral vasodilators_6m                                | No  |
| C04A_12m | Peripheral vasodilators_12m                               | No  |
| C04A_24m | Peripheral vasodilators_24m                               | No  |
| C04A_48m | Peripheral vasodilators_48m                               | No  |

|          |                                                                           |     |
|----------|---------------------------------------------------------------------------|-----|
| C05A_6m  | Agents for treatment of hemorrhoids and anal fissures for topical use_6m  | Yes |
| C05A_12m | Agents for treatment of hemorrhoids and anal fissures for topical use_12m | Yes |
| C05A_24m | Agents for treatment of hemorrhoids and anal fissures for topical use_24m | Yes |
| C05A_48m | Agents for treatment of hemorrhoids and anal fissures for topical use_48m | Yes |
| C05B_6m  | Antivaricose therapy_6m                                                   | Yes |
| C05B_12m | Antivaricose therapy_12m                                                  | No  |
| C05B_24m | Antivaricose therapy_24m                                                  | No  |
| C05B_48m | Antivaricose therapy_48m                                                  | Yes |
| C05C_6m  | Capillary stabilising agents_6m                                           | Yes |
| C05C_12m | Capillary stabilising agents_12m                                          | Yes |
| C05C_24m | Capillary stabilising agents_24m                                          | Yes |
| C05C_48m | Capillary stabilising agents_48m                                          | Yes |
| C07A_6m  | Beta blocking agents_6m                                                   | Yes |
| C07A_12m | Beta blocking agents_12m                                                  | Yes |
| C07A_24m | Beta blocking agents_24m                                                  | Yes |
| C07A_48m | Beta blocking agents_48m                                                  | Yes |
| C07B_6m  | Beta blocking agents and thiazides_6m                                     | No  |
| C07B_12m | Beta blocking agents and thiazides_12m                                    | No  |
| C07B_24m | Beta blocking agents and thiazides_24m                                    | No  |
| C07B_48m | Beta blocking agents and thiazides_48m                                    | No  |
| C07C_6m  | Beta blocking agents and other diuretics_6m                               | No  |
| C07C_12m | Beta blocking agents and other diuretics_12m                              | No  |
| C07C_24m | Beta blocking agents and other diuretics_24m                              | No  |
| C07C_48m | Beta blocking agents and other diuretics_48m                              | No  |
| C07D_6m  | Beta blocking agents, thiazides and other diuretics_6m                    | No  |
| C07D_12m | Beta blocking agents, thiazides and other diuretics_12m                   | No  |

|          |                                                                     |     |
|----------|---------------------------------------------------------------------|-----|
| C07D_24m | Beta blocking agents, thiazides and other diuretics_24m             | No  |
| C07D_48m | Beta blocking agents, thiazides and other diuretics_48m             | No  |
| C07E_6m  | Beta blocking agents and vasodilators_6m                            | No  |
| C07E_12m | Beta blocking agents and vasodilators_12m                           | No  |
| C07E_24m | Beta blocking agents and vasodilators_24m                           | No  |
| C07E_48m | Beta blocking agents and vasodilators_48m                           | No  |
| C07F_6m  | Beta blocking agents, other combinations_6m                         | No  |
| C07F_12m | Beta blocking agents, other combinations_12m                        | No  |
| C07F_24m | Beta blocking agents, other combinations_24m                        | No  |
| C07F_48m | Beta blocking agents, other combinations_48m                        | No  |
| C08C_6m  | Selective calcium channel blockers with mainly vascular effects_6m  | Yes |
| C08C_12m | Selective calcium channel blockers with mainly vascular effects_12m | Yes |
| C08C_24m | Selective calcium channel blockers with mainly vascular effects_24m | Yes |
| C08C_48m | Selective calcium channel blockers with mainly vascular effects_48m | Yes |
| C08D_6m  | Selective calcium channel blockers with direct cardiac effects_6m   | Yes |
| C08D_12m | Selective calcium channel blockers with direct cardiac effects_12m  | Yes |
| C08D_24m | Selective calcium channel blockers with direct cardiac effects_24m  | Yes |
| C08D_48m | Selective calcium channel blockers with direct cardiac effects_48m  | Yes |
| C08E_6m  | Non-selective calcium channel blockers_6m                           | No  |
| C08E_12m | Non-selective calcium channel blockers_12m                          | No  |
| C08E_24m | Non-selective calcium channel blockers_24m                          | No  |
| C08E_48m | Non-selective calcium channel blockers_48m                          | No  |
| C08G_6m  | Calcium channel blockers and diuretics_6m                           | No  |
| C08G_12m | Calcium channel blockers and diuretics_12m                          | No  |
| C08G_24m | Calcium channel blockers and diuretics_24m                          | No  |
| C08G_48m | Calcium channel blockers and diuretics_48m                          | No  |
| C09A_6m  | ACE inhibitors, plain_6m                                            | Yes |
| C09A_12m | ACE inhibitors, plain_12m                                           | Yes |

|          |                                                                         |     |
|----------|-------------------------------------------------------------------------|-----|
| C09A_24m | ACE inhibitors, plain_24m                                               | Yes |
| C09A_48m | ACE inhibitors, plain_48m                                               | Yes |
| C09B_6m  | ACE inhibitors, combinations_6m                                         | No  |
| C09B_12m | ACE inhibitors, combinations_12m                                        | Yes |
| C09B_24m | ACE inhibitors, combinations_24m                                        | Yes |
| C09B_48m | ACE inhibitors, combinations_48m                                        | Yes |
| C09C_6m  | Angiotensin II antagonists, plain_6m                                    | Yes |
| C09C_12m | Angiotensin II antagonists, plain_12m                                   | Yes |
| C09C_24m | Angiotensin II antagonists, plain_24m                                   | Yes |
| C09C_48m | Angiotensin II antagonists, plain_48m                                   | Yes |
| C09D_6m  | Angiotensin II antagonists, combinations_6m                             | No  |
| C09D_12m | Angiotensin II antagonists, combinations_12m                            | No  |
| C09D_24m | Angiotensin II antagonists, combinations_24m                            | No  |
| C09D_48m | Angiotensin II antagonists, combinations_48m                            | Yes |
| C09X_6m  | Other agents acting on the renin <sup>a</sup> _i_angiotensin system_6m  | No  |
| C09X_12m | Other agents acting on the renin <sup>a</sup> _i_angiotensin system_12m | No  |
| C09X_24m | Other agents acting on the renin <sup>a</sup> _i_angiotensin system_24m | No  |
| C09X_48m | Other agents acting on the renin <sup>a</sup> _i_angiotensin system_48m | No  |
| C10A_6m  | Lipid modifying agents, plain_6m                                        | Yes |
| C10A_12m | Lipid modifying agents, plain_12m                                       | Yes |
| C10A_24m | Lipid modifying agents, plain_24m                                       | Yes |
| C10A_48m | Lipid modifying agents, plain_48m                                       | Yes |
| C10B_6m  | Lipid modifying agents, combinations_6m                                 | No  |
| C10B_12m | Lipid modifying agents, combinations_12m                                | No  |
| C10B_24m | Lipid modifying agents, combinations_24m                                | No  |
| C10B_48m | Lipid modifying agents, combinations_48m                                | No  |
| D01A_6m  | Antifungals for topical use_6m                                          | Yes |
| D01A_12m | Antifungals for topical use_12m                                         | Yes |

|          |                                                                |     |
|----------|----------------------------------------------------------------|-----|
| D01A_24m | Antifungals for topical use_24m                                | Yes |
| D01A_48m | Antifungals for topical use_48m                                | No  |
| D01B_6m  | Antifungals for systemic use_6m                                | Yes |
| D01B_12m | Antifungals for systemic use_12m                               | Yes |
| D01B_24m | Antifungals for systemic use_24m                               | No  |
| D01B_48m | Antifungals for systemic use_48m                               | Yes |
| D02A_6m  | Emollients and protectives_6m                                  | Yes |
| D02A_12m | Emollients and protectives_12m                                 | Yes |
| D02A_24m | Emollients and protectives_24m                                 | Yes |
| D02A_48m | Emollients and protectives_48m                                 | Yes |
| D02B_6m  | Protectives against UV-radiation_6m                            | No  |
| D02B_12m | Protectives against UV-radiation_12m                           | No  |
| D02B_24m | Protectives against UV-radiation_24m                           | No  |
| D02B_48m | Protectives against UV-radiation_48m                           | No  |
| D03A_6m  | Cicatrizants_6m                                                | No  |
| D03A_12m | Cicatrizants_12m                                               | No  |
| D03A_24m | Cicatrizants_24m                                               | No  |
| D03A_48m | Cicatrizants_48m                                               | No  |
| D03B_6m  | Enzymes_6m                                                     | No  |
| D03B_12m | Enzymes_12m                                                    | No  |
| D03B_24m | Enzymes_24m                                                    | No  |
| D03B_48m | Enzymes_48m                                                    | No  |
| D04A_6m  | Antipruritics, including antihistamines, anesthetics, etc._6m  | Yes |
| D04A_12m | Antipruritics, including antihistamines, anesthetics, etc._12m | Yes |
| D04A_24m | Antipruritics, including antihistamines, anesthetics, etc._24m | Yes |
| D04A_48m | Antipruritics, including antihistamines, anesthetics, etc._48m | Yes |
| D05A_6m  | Antipsoriatics for topical use_6m                              | Yes |
| D05A_12m | Antipsoriatics for topical use_12m                             | Yes |



|          |                                                     |     |
|----------|-----------------------------------------------------|-----|
| D05A_24m | Antipsoriatics for topical use_24m                  | Yes |
| D05A_48m | Antipsoriatics for topical use_48m                  | Yes |
| D05B_6m  | Antipsoriatics for systemic use_6m                  | No  |
| D05B_12m | Antipsoriatics for systemic use_12m                 | No  |
| D05B_24m | Antipsoriatics for systemic use_24m                 | Yes |
| D05B_48m | Antipsoriatics for systemic use_48m                 | Yes |
| D06A_6m  | Antibiotics for topical use_6m                      | Yes |
| D06A_12m | Antibiotics for topical use_12m                     | Yes |
| D06A_24m | Antibiotics for topical use_24m                     | Yes |
| D06A_48m | Antibiotics for topical use_48m                     | Yes |
| D06B_6m  | Chemotherapeutics for topical use_6m                | Yes |
| D06B_12m | Chemotherapeutics for topical use_12m               | No  |
| D06B_24m | Chemotherapeutics for topical use_24m               | No  |
| D06B_48m | Chemotherapeutics for topical use_48m               | No  |
| D06C_6m  | Antibiotics and chemotherapeutics, combinations_6m  | No  |
| D06C_12m | Antibiotics and chemotherapeutics, combinations_12m | No  |
| D06C_24m | Antibiotics and chemotherapeutics, combinations_24m | No  |
| D06C_48m | Antibiotics and chemotherapeutics, combinations_48m | No  |
| D07A_6m  | Corticosteroids, plain_6m                           | Yes |
| D07A_12m | Corticosteroids, plain_12m                          | Yes |
| D07A_24m | Corticosteroids, plain_24m                          | No  |
| D07A_48m | Corticosteroids, plain_48m                          | No  |
| D07B_6m  | Corticosteroids, combinations with antiseptics_6m   | Yes |
| D07B_12m | Corticosteroids, combinations with antiseptics_12m  | Yes |
| D07B_24m | Corticosteroids, combinations with antiseptics_24m  | Yes |
| D07B_48m | Corticosteroids, combinations with antiseptics_48m  | Yes |
| D07C_6m  | Corticosteroids, combinations with antibiotics_6m   | Yes |
| D07C_12m | Corticosteroids, combinations with antibiotics_12m  | Yes |

|          |                                                                              |     |
|----------|------------------------------------------------------------------------------|-----|
| D07C_24m | Corticosteroids, combinations with antibiotics_24m                           | Yes |
| D07C_48m | Corticosteroids, combinations with antibiotics_48m                           | No  |
| D07X_6m  | Corticosteroids, other combinations_6m                                       | Yes |
| D07X_12m | Corticosteroids, other combinations_12m                                      | Yes |
| D07X_24m | Corticosteroids, other combinations_24m                                      | Yes |
| D07X_48m | Corticosteroids, other combinations_48m                                      | Yes |
| D08A_6m  | Antiseptics and disinfectants_6m                                             | No  |
| D08A_12m | Antiseptics and disinfectants_12m                                            | No  |
| D08A_24m | Antiseptics and disinfectants_24m                                            | No  |
| D08A_48m | Antiseptics and disinfectants_48m                                            | No  |
| D09A_6m  | Medicated dressings_6m                                                       | No  |
| D09A_12m | Medicated dressings_12m                                                      | No  |
| D09A_24m | Medicated dressings_24m                                                      | No  |
| D09A_48m | Medicated dressings_48m                                                      | No  |
| D10A_6m  | Anti-acne preparations for topical use_6m                                    | Yes |
| D10A_12m | Anti-acne preparations for topical use_12m                                   | Yes |
| D10A_24m | Anti-acne preparations for topical use_24m                                   | Yes |
| D10A_48m | Anti-acne preparations for topical use_48m                                   | Yes |
| D10B_6m  | Anti-acne preparations for systemic use_6m                                   | No  |
| D10B_12m | Anti-acne preparations for systemic use_12m                                  | Yes |
| D10B_24m | Anti-acne preparations for systemic use_24m                                  | Yes |
| D10B_48m | Anti-acne preparations for systemic use_48m                                  | Yes |
| D11A_6m  | Other dermatological preparations_6m                                         | Yes |
| D11A_12m | Other dermatological preparations_12m                                        | Yes |
| D11A_24m | Other dermatological preparations_24m                                        | No  |
| D11A_48m | Other dermatological preparations_48m                                        | No  |
| G01A_6m  | Antifungives and antiseptics, excluding combinations with corticosteroids_6m | Yes |

|          |                                                                                 |     |
|----------|---------------------------------------------------------------------------------|-----|
| G01A_12m | Antiinfectives and antiseptics, excluding combinations with corticosteroids_12m | Yes |
| G01A_24m | Antiinfectives and antiseptics, excluding combinations with corticosteroids_24m | Yes |
| G01A_48m | Antiinfectives and antiseptics, excluding combinations with corticosteroids_48m | Yes |
| G01B_6m  | Antiinfectives/antiseptics in combination with corticosteroids_6m               | No  |
| G01B_12m | Antiinfectives/antiseptics in combination with corticosteroids_12m              | No  |
| G01B_24m | Antiinfectives/antiseptics in combination with corticosteroids_24m              | No  |
| G01B_48m | Antiinfectives/antiseptics in combination with corticosteroids_48m              | No  |
| G02A_6m  | Uterotonics_6m                                                                  | No  |
| G02A_12m | Uterotonics_12m                                                                 | No  |
| G02A_24m | Uterotonics_24m                                                                 | No  |
| G02A_48m | Uterotonics_48m                                                                 | No  |
| G02B_6m  | Contraceptives for topical use_6m                                               | Yes |
| G02B_12m | Contraceptives for topical use_12m                                              | Yes |
| G02B_24m | Contraceptives for topical use_24m                                              | Yes |
| G02B_48m | Contraceptives for topical use_48m                                              | Yes |
| G02C_6m  | Other gynecologicals_6m                                                         | No  |
| G02C_12m | Other gynecologicals_12m                                                        | No  |
| G02C_24m | Other gynecologicals_24m                                                        | No  |
| G02C_48m | Other gynecologicals_48m                                                        | No  |
| G03A_6m  | Hormonal contraceptives for systemic use_6m                                     | Yes |
| G03A_12m | Hormonal contraceptives for systemic use_12m                                    | Yes |
| G03A_24m | Hormonal contraceptives for systemic use_24m                                    | Yes |
| G03A_48m | Hormonal contraceptives for systemic use_48m                                    | Yes |
| G03B_6m  | Androgens_6m                                                                    | Yes |
| G03B_12m | Androgens_12m                                                                   | Yes |
| G03B_24m | Androgens_24m                                                                   | Yes |

|          |                                                             |     |
|----------|-------------------------------------------------------------|-----|
| G03B_48m | Androgens_48m                                               | Yes |
| G03C_6m  | Estrogens_6m                                                | No  |
| G03C_12m | Estrogens_12m                                               | No  |
| G03C_24m | Estrogens_24m                                               | No  |
| G03C_48m | Estrogens_48m                                               | No  |
| G03D_6m  | Progestogens_6m                                             | Yes |
| G03D_12m | Progestogens_12m                                            | Yes |
| G03D_24m | Progestogens_24m                                            | Yes |
| G03D_48m | Progestogens_48m                                            | Yes |
| G03E_6m  | Androgens and female sex hormones in combination_6m         | No  |
| G03E_12m | Androgens and female sex hormones in combination_12m        | No  |
| G03E_24m | Androgens and female sex hormones in combination_24m        | No  |
| G03E_48m | Androgens and female sex hormones in combination_48m        | No  |
| G03F_6m  | Progestogens and estrogens in combination_6m                | No  |
| G03F_12m | Progestogens and estrogens in combination_12m               | Yes |
| G03F_24m | Progestogens and estrogens in combination_24m               | Yes |
| G03F_48m | Progestogens and estrogens in combination_48m               | Yes |
| G03G_6m  | Gonadotropins and other ovulation stimulants_6m             | No  |
| G03G_12m | Gonadotropins and other ovulation stimulants_12m            | No  |
| G03G_24m | Gonadotropins and other ovulation stimulants_24m            | No  |
| G03G_48m | Gonadotropins and other ovulation stimulants_48m            | Yes |
| G03H_6m  | Antiandrogens_6m                                            | Yes |
| G03H_12m | Antiandrogens_12m                                           | Yes |
| G03H_24m | Antiandrogens_24m                                           | Yes |
| G03H_48m | Antiandrogens_48m                                           | Yes |
| G03X_6m  | Other sex hormones and modulators of the genital system_6m  | No  |
| G03X_12m | Other sex hormones and modulators of the genital system_12m | No  |
| G03X_24m | Other sex hormones and modulators of the genital system_24m | No  |

|          |                                                             |     |
|----------|-------------------------------------------------------------|-----|
| G03X_48m | Other sex hormones and modulators of the genital system_48m | No  |
| G04B_6m  | Urologicals_6m                                              | Yes |
| G04B_12m | Urologicals_12m                                             | Yes |
| G04B_24m | Urologicals_24m                                             | Yes |
| G04B_48m | Urologicals_48m                                             | Yes |
| G04C_6m  | Drugs used in benign prostatic hypertrophy_6m               | Yes |
| G04C_12m | Drugs used in benign prostatic hypertrophy_12m              | Yes |
| G04C_24m | Drugs used in benign prostatic hypertrophy_24m              | Yes |
| G04C_48m | Drugs used in benign prostatic hypertrophy_48m              | Yes |
| H01A_6m  | Anterior pituitary lobe hormones and analogues_6m           | No  |
| H01A_12m | Anterior pituitary lobe hormones and analogues_12m          | No  |
| H01A_24m | Anterior pituitary lobe hormones and analogues_24m          | No  |
| H01A_48m | Anterior pituitary lobe hormones and analogues_48m          | No  |
| H01B_6m  | Posterior pituitary lobe hormones_6m                        | Yes |
| H01B_12m | Posterior pituitary lobe hormones_12m                       | Yes |
| H01B_24m | Posterior pituitary lobe hormones_24m                       | No  |
| H01B_48m | Posterior pituitary lobe hormones_48m                       | No  |
| H01C_6m  | Hypothalamic hormones_6m                                    | No  |
| H01C_12m | Hypothalamic hormones_12m                                   | No  |
| H01C_24m | Hypothalamic hormones_24m                                   | No  |
| H01C_48m | Hypothalamic hormones_48m                                   | No  |
| H02A_6m  | Corticosteroids for systemic use, plain_6m                  | Yes |
| H02A_12m | Corticosteroids for systemic use, plain_12m                 | Yes |
| H02A_24m | Corticosteroids for systemic use, plain_24m                 | Yes |
| H02A_48m | Corticosteroids for systemic use, plain_48m                 | Yes |
| H02B_6m  | Corticosteroids for systemic use, combinations_6m           | No  |
| H02B_12m | Corticosteroids for systemic use, combinations_12m          | No  |
| H02B_24m | Corticosteroids for systemic use, combinations_24m          | No  |

|          |                                                    |     |
|----------|----------------------------------------------------|-----|
| H02B_48m | Corticosteroids for systemic use, combinations_48m | No  |
| H02C_6m  | Antiadrenal preparations_6m                        | No  |
| H02C_12m | Antiadrenal preparations_12m                       | No  |
| H02C_24m | Antiadrenal preparations_24m                       | No  |
| H02C_48m | Antiadrenal preparations_48m                       | No  |
| H03A_6m  | Thyroid preparations_6m                            | No  |
| H03A_12m | Thyroid preparations_12m                           | Yes |
| H03A_24m | Thyroid preparations_24m                           | Yes |
| H03A_48m | Thyroid preparations_48m                           | Yes |
| H03B_6m  | Antithyroid preparations_6m                        | No  |
| H03B_12m | Antithyroid preparations_12m                       | No  |
| H03B_24m | Antithyroid preparations_24m                       | No  |
| H03B_48m | Antithyroid preparations_48m                       | No  |
| H03C_6m  | Iodine therapy_6m                                  | No  |
| H03C_12m | Iodine therapy_12m                                 | No  |
| H03C_24m | Iodine therapy_24m                                 | No  |
| H03C_48m | Iodine therapy_48m                                 | No  |
| H04A_6m  | Glycogenolytic hormones_6m                         | No  |
| H04A_12m | Glycogenolytic hormones_12m                        | Yes |
| H04A_24m | Glycogenolytic hormones_24m                        | Yes |
| H04A_48m | Glycogenolytic hormones_48m                        | Yes |
| H05A_6m  | Parathyroid hormones and analogues_6m              | No  |
| H05A_12m | Parathyroid hormones and analogues_12m             | No  |
| H05A_24m | Parathyroid hormones and analogues_24m             | No  |
| H05A_48m | Parathyroid hormones and analogues_48m             | No  |
| H05B_6m  | Anti-parathyroid agents_6m                         | No  |
| H05B_12m | Anti-parathyroid agents_12m                        | No  |
| H05B_24m | Anti-parathyroid agents_24m                        | No  |

|          |                                                 |     |
|----------|-------------------------------------------------|-----|
| H05B_48m | Anti-parathyroid agents_48m                     | No  |
| J01A_6m  | Tetracyclines_6m                                | Yes |
| J01A_12m | Tetracyclines_12m                               | Yes |
| J01A_24m | Tetracyclines_24m                               | Yes |
| J01A_48m | Tetracyclines_48m                               | Yes |
| J01B_6m  | Amphenicols_6m                                  | No  |
| J01B_12m | Amphenicols_12m                                 | No  |
| J01B_24m | Amphenicols_24m                                 | No  |
| J01B_48m | Amphenicols_48m                                 | No  |
| J01C_6m  | Beta-lactam antibacterials, penicillins_6m      | Yes |
| J01C_12m | Beta-lactam antibacterials, penicillins_12m     | Yes |
| J01C_24m | Beta-lactam antibacterials, penicillins_24m     | Yes |
| J01C_48m | Beta-lactam antibacterials, penicillins_48m     | Yes |
| J01D_6m  | Other beta-lactam antibacterials_6m             | No  |
| J01D_12m | Other beta-lactam antibacterials_12m            | No  |
| J01D_24m | Other beta-lactam antibacterials_24m            | No  |
| J01D_48m | Other beta-lactam antibacterials_48m            | No  |
| J01E_6m  | Sulfonamides and trimethoprim_6m                | Yes |
| J01E_12m | Sulfonamides and trimethoprim_12m               | Yes |
| J01E_24m | Sulfonamides and trimethoprim_24m               | Yes |
| J01E_48m | Sulfonamides and trimethoprim_48m               | No  |
| J01F_6m  | Macrolides, lincosamides and streptogramins_6m  | Yes |
| J01F_12m | Macrolides, lincosamides and streptogramins_12m | Yes |
| J01F_24m | Macrolides, lincosamides and streptogramins_24m | No  |
| J01F_48m | Macrolides, lincosamides and streptogramins_48m | No  |
| J01G_6m  | Aminoglycoside antibacterials_6m                | No  |
| J01G_12m | Aminoglycoside antibacterials_12m               | No  |
| J01G_24m | Aminoglycoside antibacterials_24m               | No  |

|          |                                         |     |
|----------|-----------------------------------------|-----|
| J01G_48m | Aminoglycoside antibacterials_48m       | No  |
| J01M_6m  | Quinolone antibacterials_6m             | Yes |
| J01M_12m | Quinolone antibacterials_12m            | Yes |
| J01M_24m | Quinolone antibacterials_24m            | Yes |
| J01M_48m | Quinolone antibacterials_48m            | Yes |
| J01R_6m  | Combinations of antibacterials_6m       | No  |
| J01R_12m | Combinations of antibacterials_12m      | No  |
| J01R_24m | Combinations of antibacterials_24m      | No  |
| J01R_48m | Combinations of antibacterials_48m      | No  |
| J01X_6m  | Other antibacterials_6m                 | Yes |
| J01X_12m | Other antibacterials_12m                | Yes |
| J01X_24m | Other antibacterials_24m                | Yes |
| J01X_48m | Other antibacterials_48m                | Yes |
| J02A_6m  | Antimycotics for systemic use_6m        | Yes |
| J02A_12m | Antimycotics for systemic use_12m       | No  |
| J02A_24m | Antimycotics for systemic use_24m       | No  |
| J02A_48m | Antimycotics for systemic use_48m       | No  |
| J04A_6m  | Drugs for treatment of tuberculosis_6m  | No  |
| J04A_12m | Drugs for treatment of tuberculosis_12m | No  |
| J04A_24m | Drugs for treatment of tuberculosis_24m | Yes |
| J04A_48m | Drugs for treatment of tuberculosis_48m | Yes |
| J04B_6m  | Drugs for treatment of lepra_6m         | No  |
| J04B_12m | Drugs for treatment of lepra_12m        | No  |
| J04B_24m | Drugs for treatment of lepra_24m        | No  |
| J04B_48m | Drugs for treatment of lepra_48m        | No  |
| J05A_6m  | Direct acting antiviral drugs_6m        | No  |
| J05A_12m | Direct acting antiviral drugs_12m       | No  |
| J05A_24m | Direct acting antiviral drugs_24m       | No  |



|          |                                   |     |
|----------|-----------------------------------|-----|
| J05A_48m | Direct acting antiviral drugs_48m | No  |
| J06A_6m  | Immune sera_6m                    | No  |
| J06A_12m | Immune sera_12m                   | No  |
| J06A_24m | Immune sera_24m                   | No  |
| J06A_48m | Immune sera_48m                   | No  |
| J06B_6m  | Immunoglobulins_6m                | No  |
| J06B_12m | Immunoglobulins_12m               | No  |
| J06B_24m | Immunoglobulins_24m               | No  |
| J06B_48m | Immunoglobulins_48m               | Yes |
| J07A_6m  | Bacterial vaccines_6m             | No  |
| J07A_12m | Bacterial vaccines_12m            | No  |
| J07A_24m | Bacterial vaccines_24m            | Yes |
| J07A_48m | Bacterial vaccines_48m            | Yes |
| J07B_6m  | Viral vaccines_6m                 | Yes |
| J07B_12m | Viral vaccines_12m                | Yes |
| J07B_24m | Viral vaccines_24m                | Yes |
| J07B_48m | Viral vaccines_48m                | Yes |
| J07C_6m  | Bacterial and viral vaccines_6m   | No  |
| J07C_12m | Bacterial and viral vaccines_12m  | No  |
| J07C_24m | Bacterial and viral vaccines_24m  | No  |
| J07C_48m | Bacterial and viral vaccines_48m  | No  |
| J07X_6m  | Other vaccines_6m                 | No  |
| J07X_12m | Other vaccines_12m                | No  |
| J07X_24m | Other vaccines_24m                | No  |
| J07X_48m | Other vaccines_48m                | No  |
| L01A_6m  | Alkylating agents_6m              | No  |
| L01A_12m | Alkylating agents_12m             | No  |
| L01A_24m | Alkylating agents_24m             | No  |

|          |                                                  |     |
|----------|--------------------------------------------------|-----|
| L01A_48m | Alkylating agents_48m                            | Yes |
| L01B_6m  | Antimetabolites_6m                               | No  |
| L01B_12m | Antimetabolites_12m                              | No  |
| L01B_24m | Antimetabolites_24m                              | No  |
| L01B_48m | Antimetabolites_48m                              | No  |
| L01C_6m  | Plant alkaloids and other natural products_6m    | No  |
| L01C_12m | Plant alkaloids and other natural products_12m   | No  |
| L01C_24m | Plant alkaloids and other natural products_24m   | No  |
| L01C_48m | Plant alkaloids and other natural products_48m   | No  |
| L01D_6m  | Cytotoxic antibiotics and related substances_6m  | No  |
| L01D_12m | Cytotoxic antibiotics and related substances_12m | No  |
| L01D_24m | Cytotoxic antibiotics and related substances_24m | No  |
| L01D_48m | Cytotoxic antibiotics and related substances_48m | No  |
| L01X_6m  | Other antineoplastic agents_6m                   | No  |
| L01X_12m | Other antineoplastic agents_12m                  | No  |
| L01X_24m | Other antineoplastic agents_24m                  | No  |
| L01X_48m | Other antineoplastic agents_48m                  | No  |
| L02A_6m  | Hormones and related agents_6m                   | No  |
| L02A_12m | Hormones and related agents_12m                  | No  |
| L02A_24m | Hormones and related agents_24m                  | No  |
| L02A_48m | Hormones and related agents_48m                  | Yes |
| L02B_6m  | Hormone antagonists and related agents_6m        | Yes |
| L02B_12m | Hormone antagonists and related agents_12m       | Yes |
| L02B_24m | Hormone antagonists and related agents_24m       | Yes |
| L02B_48m | Hormone antagonists and related agents_48m       | Yes |
| L03A_6m  | Immunostimulants_6m                              | No  |
| L03A_12m | Immunostimulants_12m                             | No  |
| L03A_24m | Immunostimulants_24m                             | No  |

|          |                                                                |     |
|----------|----------------------------------------------------------------|-----|
| L03A_48m | Immunostimulants_48m                                           | No  |
| L04A_6m  | Immunosuppressants_6m                                          | Yes |
| L04A_12m | Immunosuppressants_12m                                         | Yes |
| L04A_24m | Immunosuppressants_24m                                         | No  |
| L04A_48m | Immunosuppressants_48m                                         | No  |
| M01A_6m  | Anti-inflammatory and antirheumatic products, non-steroids_6m  | Yes |
| M01A_12m | Anti-inflammatory and antirheumatic products, non-steroids_12m | Yes |
| M01A_24m | Anti-inflammatory and antirheumatic products, non-steroids_24m | Yes |
| M01A_48m | Anti-inflammatory and antirheumatic products, non-steroids_48m | Yes |
| M01B_6m  | Anti-inflammatory/antirheumatic agents in combination_6m       | No  |
| M01B_12m | Anti-inflammatory/antirheumatic agents in combination_12m      | No  |
| M01B_24m | Anti-inflammatory/antirheumatic agents in combination_24m      | No  |
| M01B_48m | Anti-inflammatory/antirheumatic agents in combination_48m      | No  |
| M01C_6m  | Specific antirheumatic agents_6m                               | No  |
| M01C_12m | Specific antirheumatic agents_12m                              | No  |
| M01C_24m | Specific antirheumatic agents_24m                              | No  |
| M01C_48m | Specific antirheumatic agents_48m                              | No  |
| M02A_6m  | Topical products for joint and muscular pain_6m                | Yes |
| M02A_12m | Topical products for joint and muscular pain_12m               | Yes |
| M02A_24m | Topical products for joint and muscular pain_24m               | Yes |
| M02A_48m | Topical products for joint and muscular pain_48m               | Yes |
| M03A_6m  | Muscle relaxants, peripherally acting agents_6m                | No  |
| M03A_12m | Muscle relaxants, peripherally acting agents_12m               | No  |
| M03A_24m | Muscle relaxants, peripherally acting agents_24m               | No  |
| M03A_48m | Muscle relaxants, peripherally acting agents_48m               | No  |
| M03B_6m  | Muscle relaxants, centrally acting agents_6m                   | Yes |
| M03B_12m | Muscle relaxants, centrally acting agents_12m                  | Yes |
| M03B_24m | Muscle relaxants, centrally acting agents_24m                  | Yes |

|          |                                                              |     |
|----------|--------------------------------------------------------------|-----|
| M03B_48m | Muscle relaxants, centrally acting agents_48m                | Yes |
| M03C_6m  | Muscle relaxants, directly acting agents_6m                  | No  |
| M03C_12m | Muscle relaxants, directly acting agents_12m                 | No  |
| M03C_24m | Muscle relaxants, directly acting agents_24m                 | No  |
| M03C_48m | Muscle relaxants, directly acting agents_48m                 | No  |
| M04A_6m  | Antigout preparations_6m                                     | Yes |
| M04A_12m | Antigout preparations_12m                                    | Yes |
| M04A_24m | Antigout preparations_24m                                    | Yes |
| M04A_48m | Antigout preparations_48m                                    | Yes |
| M05B_6m  | Drugs affecting bone structure and mineralization_6m         | Yes |
| M05B_12m | Drugs affecting bone structure and mineralization_12m        | Yes |
| M05B_24m | Drugs affecting bone structure and mineralization_24m        | Yes |
| M05B_48m | Drugs affecting bone structure and mineralization_48m        | Yes |
| M09A_6m  | Other drugs for disorders of the musculo-skeletal system_6m  | No  |
| M09A_12m | Other drugs for disorders of the musculo-skeletal system_12m | No  |
| M09A_24m | Other drugs for disorders of the musculo-skeletal system_24m | No  |
| M09A_48m | Other drugs for disorders of the musculo-skeletal system_48m | No  |
| N01A_6m  | Anesthetics, general_6m                                      | No  |
| N01A_12m | Anesthetics, general_12m                                     | No  |
| N01A_24m | Anesthetics, general_24m                                     | No  |
| N01A_48m | Anesthetics, general_48m                                     | No  |
| N01B_6m  | Anesthetics, local_6m                                        | Yes |
| N01B_12m | Anesthetics, local_12m                                       | Yes |
| N01B_24m | Anesthetics, local_24m                                       | Yes |
| N01B_48m | Anesthetics, local_48m                                       | Yes |
| N02A_6m  | Opioids_6m                                                   | Yes |
| N02A_12m | Opioids_12m                                                  | Yes |
| N02A_24m | Opioids_24m                                                  | Yes |

|          |                                       |     |
|----------|---------------------------------------|-----|
| N02A_48m | Opioids_48m                           | Yes |
| N02B_6m  | Other analgesics and antipyretics_6m  | Yes |
| N02B_12m | Other analgesics and antipyretics_12m | Yes |
| N02B_24m | Other analgesics and antipyretics_24m | Yes |
| N02B_48m | Other analgesics and antipyretics_48m | Yes |
| N02C_6m  | Antimigraine preparations_6m          | Yes |
| N02C_12m | Antimigraine preparations_12m         | Yes |
| N02C_24m | Antimigraine preparations_24m         | Yes |
| N02C_48m | Antimigraine preparations_48m         | No  |
| N03A_6m  | Antiepileptics_6m                     | Yes |
| N03A_12m | Antiepileptics_12m                    | Yes |
| N03A_24m | Antiepileptics_24m                    | Yes |
| N03A_48m | Antiepileptics_48m                    | Yes |
| N04A_6m  | Anticholinergic agents_6m             | Yes |
| N04A_12m | Anticholinergic agents_12m            | Yes |
| N04A_24m | Anticholinergic agents_24m            | Yes |
| N04A_48m | Anticholinergic agents_48m            | Yes |
| N04B_6m  | Dopaminergic agents_6m                | Yes |
| N04B_12m | Dopaminergic agents_12m               | Yes |
| N04B_24m | Dopaminergic agents_24m               | Yes |
| N04B_48m | Dopaminergic agents_48m               | Yes |
| N05A_6m  | Antipsychotics_6m                     | Yes |
| N05A_12m | Antipsychotics_12m                    | Yes |
| N05A_24m | Antipsychotics_24m                    | Yes |
| N05A_48m | Antipsychotics_48m                    | Yes |
| N05B_6m  | Anxiolytics_6m                        | Yes |
| N05B_12m | Anxiolytics_12m                       | Yes |
| N05B_24m | Anxiolytics_24m                       | Yes |

|          |                                                           |     |
|----------|-----------------------------------------------------------|-----|
| N05B_48m | Anxiolytics_48m                                           | Yes |
| N05C_6m  | Hypnotics and sedatives_6m                                | Yes |
| N05C_12m | Hypnotics and sedatives_12m                               | Yes |
| N05C_24m | Hypnotics and sedatives_24m                               | Yes |
| N05C_48m | Hypnotics and sedatives_48m                               | Yes |
| N06A_6m  | Antidepressants_6m                                        | Yes |
| N06A_12m | Antidepressants_12m                                       | Yes |
| N06A_24m | Antidepressants_24m                                       | Yes |
| N06A_48m | Antidepressants_48m                                       | Yes |
| N06B_6m  | Psychostimulants, agents used for ADHD and nootropics_6m  | Yes |
| N06B_12m | Psychostimulants, agents used for ADHD and nootropics_12m | Yes |
| N06B_24m | Psychostimulants, agents used for ADHD and nootropics_24m | Yes |
| N06B_48m | Psychostimulants, agents used for ADHD and nootropics_48m | Yes |
| N06C_6m  | Psycholeptics and psychoanaleptics in combination_6m      | No  |
| N06C_12m | Psycholeptics and psychoanaleptics in combination_12m     | No  |
| N06C_24m | Psycholeptics and psychoanaleptics in combination_24m     | No  |
| N06C_48m | Psycholeptics and psychoanaleptics in combination_48m     | No  |
| N06D_6m  | Anti-dementia drugs_6m                                    | No  |
| N06D_12m | Anti-dementia drugs_12m                                   | No  |
| N06D_24m | Anti-dementia drugs_24m                                   | No  |
| N06D_48m | Anti-dementia drugs_48m                                   | No  |
| N07A_6m  | Parasympathomimetics_6m                                   | No  |
| N07A_12m | Parasympathomimetics_12m                                  | No  |
| N07A_24m | Parasympathomimetics_24m                                  | No  |
| N07A_48m | Parasympathomimetics_48m                                  | No  |
| N07B_6m  | Drugs used in addictive disorders_6m                      | Yes |
| N07B_12m | Drugs used in addictive disorders_12m                     | Yes |
| N07B_24m | Drugs used in addictive disorders_24m                     | Yes |

|          |                                                            |     |
|----------|------------------------------------------------------------|-----|
| N07B_48m | Drugs used in addictive disorders_48m                      | Yes |
| N07C_6m  | Antivertigo preparations_6m                                | Yes |
| N07C_12m | Antivertigo preparations_12m                               | Yes |
| N07C_24m | Antivertigo preparations_24m                               | Yes |
| N07C_48m | Antivertigo preparations_48m                               | Yes |
| N07X_6m  | Other nervous system drugs_6m                              | Yes |
| N07X_12m | Other nervous system drugs_12m                             | Yes |
| N07X_24m | Other nervous system drugs_24m                             | Yes |
| N07X_48m | Other nervous system drugs_48m                             | Yes |
| P01A_6m  | Agents against amoebiasis and other protozoal diseases_6m  | Yes |
| P01A_12m | Agents against amoebiasis and other protozoal diseases_12m | Yes |
| P01A_24m | Agents against amoebiasis and other protozoal diseases_24m | Yes |
| P01A_48m | Agents against amoebiasis and other protozoal diseases_48m | Yes |
| P01B_6m  | Antimalarials_6m                                           | Yes |
| P01B_12m | Antimalarials_12m                                          | Yes |
| P01B_24m | Antimalarials_24m                                          | Yes |
| P01B_48m | Antimalarials_48m                                          | Yes |
| P01C_6m  | Agents against leishmaniasis and trypanosomiasis_6m        | No  |
| P01C_12m | Agents against leishmaniasis and trypanosomiasis_12m       | No  |
| P01C_24m | Agents against leishmaniasis and trypanosomiasis_24m       | No  |
| P01C_48m | Agents against leishmaniasis and trypanosomiasis_48m       | No  |
| P02B_6m  | Antitrematodals_6m                                         | No  |
| P02B_12m | Antitrematodals_12m                                        | No  |
| P02B_24m | Antitrematodals_24m                                        | No  |
| P02B_48m | Antitrematodals_48m                                        | No  |
| P02C_6m  | Antinematodal agents_6m                                    | Yes |
| P02C_12m | Antinematodal agents_12m                                   | Yes |
| P02C_24m | Antinematodal agents_24m                                   | Yes |

|          |                                                                |     |
|----------|----------------------------------------------------------------|-----|
| P02C_48m | Antinematodal agents_48m                                       | Yes |
| P02D_6m  | Anticestodals_6m                                               | No  |
| P02D_12m | Anticestodals_12m                                              | No  |
| P02D_24m | Anticestodals_24m                                              | No  |
| P02D_48m | Anticestodals_48m                                              | No  |
| P03A_6m  | Ectoparasiticides, including scabicides_6m                     | No  |
| P03A_12m | Ectoparasiticides, including scabicides_12m                    | No  |
| P03A_24m | Ectoparasiticides, including scabicides_24m                    | Yes |
| P03A_48m | Ectoparasiticides, including scabicides_48m                    | Yes |
| P03B_6m  | Insecticides and repellents_6m                                 | No  |
| P03B_12m | Insecticides and repellents_12m                                | No  |
| P03B_24m | Insecticides and repellents_24m                                | No  |
| P03B_48m | Insecticides and repellents_48m                                | No  |
| R01A_6m  | Decongestants and other nasal preparations for topical use_6m  | No  |
| R01A_12m | Decongestants and other nasal preparations for topical use_12m | Yes |
| R01A_24m | Decongestants and other nasal preparations for topical use_24m | Yes |
| R01A_48m | Decongestants and other nasal preparations for topical use_48m | No  |
| R01B_6m  | Nasal decongestants for systemic use_6m                        | No  |
| R01B_12m | Nasal decongestants for systemic use_12m                       | No  |
| R01B_24m | Nasal decongestants for systemic use_24m                       | Yes |
| R01B_48m | Nasal decongestants for systemic use_48m                       | No  |
| R02A_6m  | Throat preparations_6m                                         | Yes |
| R02A_12m | Throat preparations_12m                                        | Yes |
| R02A_24m | Throat preparations_24m                                        | Yes |
| R02A_48m | Throat preparations_48m                                        | Yes |
| R03A_6m  | Adrenergics, inhalants_6m                                      | Yes |
| R03A_12m | Adrenergics, inhalants_12m                                     | Yes |
| R03A_24m | Adrenergics, inhalants_24m                                     | Yes |



|          |                                                                  |     |
|----------|------------------------------------------------------------------|-----|
| R03A_48m | Adrenergics, inhalants_48m                                       | Yes |
| R03B_6m  | Other drugs for obstructive airway diseases, inhalants_6m        | Yes |
| R03B_12m | Other drugs for obstructive airway diseases, inhalants_12m       | Yes |
| R03B_24m | Other drugs for obstructive airway diseases, inhalants_24m       | Yes |
| R03B_48m | Other drugs for obstructive airway diseases, inhalants_48m       | Yes |
| R03C_6m  | Adrenergics for systemic use_6m                                  | Yes |
| R03C_12m | Adrenergics for systemic use_12m                                 | Yes |
| R03C_24m | Adrenergics for systemic use_24m                                 | Yes |
| R03C_48m | Adrenergics for systemic use_48m                                 | No  |
| R03D_6m  | Other systemic drugs for obstructive airway diseases_6m          | Yes |
| R03D_12m | Other systemic drugs for obstructive airway diseases_12m         | Yes |
| R03D_24m | Other systemic drugs for obstructive airway diseases_24m         | Yes |
| R03D_48m | Other systemic drugs for obstructive airway diseases_48m         | Yes |
| R05C_6m  | Expectorants, excluding combinations with cough suppressants_6m  | Yes |
| R05C_12m | Expectorants, excluding combinations with cough suppressants_12m | Yes |
| R05C_24m | Expectorants, excluding combinations with cough suppressants_24m | Yes |
| R05C_48m | Expectorants, excluding combinations with cough suppressants_48m | Yes |
| R05D_6m  | Cough suppressants, excluding combinations with expectorants_6m  | Yes |
| R05D_12m | Cough suppressants, excluding combinations with expectorants_12m | Yes |
| R05D_24m | Cough suppressants, excluding combinations with expectorants_24m | Yes |
| R05D_48m | Cough suppressants, excluding combinations with expectorants_48m | Yes |
| R05F_6m  | Cough suppressants and expectorants, combinations_6m             | No  |
| R05F_12m | Cough suppressants and expectorants, combinations_12m            | No  |
| R05F_24m | Cough suppressants and expectorants, combinations_24m            | No  |
| R05F_48m | Cough suppressants and expectorants, combinations_48m            | No  |
| R05X_6m  | Other cold preparations_6m                                       | No  |
| R05X_12m | Other cold preparations_12m                                      | No  |
| R05X_24m | Other cold preparations_24m                                      | No  |

|          |                                                                 |     |
|----------|-----------------------------------------------------------------|-----|
| R05X_48m | Other cold preparations_48m                                     | No  |
| R06A_6m  | Antihistamines for systemic use_6m                              | Yes |
| R06A_12m | Antihistamines for systemic use_12m                             | Yes |
| R06A_24m | Antihistamines for systemic use_24m                             | No  |
| R06A_48m | Antihistamines for systemic use_48m                             | No  |
| R07A_6m  | Other respiratory system products_6m                            | No  |
| R07A_12m | Other respiratory system products_12m                           | No  |
| R07A_24m | Other respiratory system products_24m                           | No  |
| R07A_48m | Other respiratory system products_48m                           | No  |
| S01A_6m  | Anti-infectives_6m                                              | Yes |
| S01A_12m | Anti-infectives_12m                                             | Yes |
| S01A_24m | Anti-infectives_24m                                             | No  |
| S01A_48m | Anti-infectives_48m                                             | No  |
| S01B_6m  | Anti-inflammatory agents_6m                                     | Yes |
| S01B_12m | Anti-inflammatory agents_12m                                    | Yes |
| S01B_24m | Anti-inflammatory agents_24m                                    | Yes |
| S01B_48m | Anti-inflammatory agents_48m                                    | Yes |
| S01C_6m  | Anti-inflammatory agents and anti-infectives in combination_6m  | Yes |
| S01C_12m | Anti-inflammatory agents and anti-infectives in combination_12m | Yes |
| S01C_24m | Anti-inflammatory agents and anti-infectives in combination_24m | Yes |
| S01C_48m | Anti-inflammatory agents and anti-infectives in combination_48m | Yes |
| S01E_6m  | Antiglaucoma preparations and miotics_6m                        | Yes |
| S01E_12m | Antiglaucoma preparations and miotics_12m                       | Yes |
| S01E_24m | Antiglaucoma preparations and miotics_24m                       | Yes |
| S01E_48m | Antiglaucoma preparations and miotics_48m                       | Yes |
| S01F_6m  | Mydriatics and cycloplegics_6m                                  | Yes |
| S01F_12m | Mydriatics and cycloplegics_12m                                 | Yes |
| S01F_24m | Mydriatics and cycloplegics_24m                                 | Yes |

|          |                                     |     |
|----------|-------------------------------------|-----|
| S01F_48m | Mydriatics and cycloplegics_48m     | Yes |
| S01G_6m  | Decongestants and antiallergics_6m  | No  |
| S01G_12m | Decongestants and antiallergics_12m | Yes |
| S01G_24m | Decongestants and antiallergics_24m | No  |
| S01G_48m | Decongestants and antiallergics_48m | Yes |
| S01H_6m  | Local anesthetics_6m                | No  |
| S01H_12m | Local anesthetics_12m               | Yes |
| S01H_24m | Local anesthetics_24m               | Yes |
| S01H_48m | Local anesthetics_48m               | Yes |
| S01J_6m  | Diagnostic agents_6m                | No  |
| S01J_12m | Diagnostic agents_12m               | No  |
| S01J_24m | Diagnostic agents_24m               | No  |
| S01J_48m | Diagnostic agents_48m               | No  |
| S01K_6m  | Surgical aids_6m                    | No  |
| S01K_12m | Surgical aids_12m                   | No  |
| S01K_24m | Surgical aids_24m                   | No  |
| S01K_48m | Surgical aids_48m                   | No  |
| S01L_6m  | Ocular vascular disorder agents_6m  | No  |
| S01L_12m | Ocular vascular disorder agents_12m | No  |
| S01L_24m | Ocular vascular disorder agents_24m | No  |
| S01L_48m | Ocular vascular disorder agents_48m | No  |
| S01X_6m  | Other ophthalmologicals_6m          | Yes |
| S01X_12m | Other ophthalmologicals_12m         | Yes |
| S01X_24m | Other ophthalmologicals_24m         | Yes |
| S01X_48m | Other ophthalmologicals_48m         | Yes |
| S02A_6m  | Anti-infectives_6m                  | Yes |
| S02A_12m | Anti-infectives_12m                 | Yes |
| S02A_24m | Anti-infectives_24m                 | Yes |

|          |                                                        |     |
|----------|--------------------------------------------------------|-----|
| S02A_48m | Anti-infectives_48m                                    | Yes |
| S02B_6m  | Corticosteroids_6m                                     | No  |
| S02B_12m | Corticosteroids_12m                                    | No  |
| S02B_24m | Corticosteroids_24m                                    | No  |
| S02B_48m | Corticosteroids_48m                                    | No  |
| S02C_6m  | Corticosteroids and anti-infectives in combination_6m  | Yes |
| S02C_12m | Corticosteroids and anti-infectives in combination_12m | No  |
| S02C_24m | Corticosteroids and anti-infectives in combination_24m | No  |
| S02C_48m | Corticosteroids and anti-infectives in combination_48m | No  |
| S02D_6m  | Other otologicals_6m                                   | No  |
| S02D_12m | Other otologicals_12m                                  | No  |
| S02D_24m | Other otologicals_24m                                  | No  |
| S02D_48m | Other otologicals_48m                                  | No  |
| S03A_6m  | Anti-infectives_6m                                     | No  |
| S03A_12m | Anti-infectives_12m                                    | No  |
| S03A_24m | Anti-infectives_24m                                    | No  |
| S03A_48m | Anti-infectives_48m                                    | No  |
| S03B_6m  | Corticosteroids_6m                                     | No  |
| S03B_12m | Corticosteroids_12m                                    | Yes |
| S03B_24m | Corticosteroids_24m                                    | Yes |
| S03B_48m | Corticosteroids_48m                                    | No  |
| S03C_6m  | Corticosteroids and anti-infectives in combination_6m  | Yes |
| S03C_12m | Corticosteroids and anti-infectives in combination_12m | Yes |
| S03C_24m | Corticosteroids and anti-infectives in combination_24m | Yes |
| S03C_48m | Corticosteroids and anti-infectives in combination_48m | Yes |
| S03D_6m  | Other ophthalmological and otological preparations_6m  | No  |
| S03D_12m | Other ophthalmological and otological preparations_12m | No  |
| S03D_24m | Other ophthalmological and otological preparations_24m | No  |

|          |                                                        |     |
|----------|--------------------------------------------------------|-----|
| S03D_48m | Other ophthalmological and otological preparations_48m | No  |
| V01A_6m  | Allergens_6m                                           | No  |
| V01A_12m | Allergens_12m                                          | No  |
| V01A_24m | Allergens_24m                                          | No  |
| V01A_48m | Allergens_48m                                          | Yes |
| V03A_6m  | All other therapeutic products_6m                      | No  |
| V03A_12m | All other therapeutic products_12m                     | No  |
| V03A_24m | All other therapeutic products_24m                     | No  |
| V03A_48m | All other therapeutic products_48m                     | No  |
| V04B_6m  | Urine tests_6m                                         | No  |
| V04B_12m | Urine tests_12m                                        | No  |
| V04B_24m | Urine tests_24m                                        | No  |
| V04B_48m | Urine tests_48m                                        | No  |
| V04C_6m  | Other diagnostic agents_6m                             | No  |
| V04C_12m | Other diagnostic agents_12m                            | No  |
| V04C_24m | Other diagnostic agents_24m                            | No  |
| V04C_48m | Other diagnostic agents_48m                            | No  |
| V06A_6m  | Diet formulations for treatment of obesity_6m          | No  |
| V06A_12m | Diet formulations for treatment of obesity_12m         | No  |
| V06A_24m | Diet formulations for treatment of obesity_24m         | No  |
| V06A_48m | Diet formulations for treatment of obesity_48m         | No  |
| V06B_6m  | Protein supplements_6m                                 | No  |
| V06B_12m | Protein supplements_12m                                | No  |
| V06B_24m | Protein supplements_24m                                | No  |
| V06B_48m | Protein supplements_48m                                | No  |
| V06C_6m  | Infant formulas_6m                                     | No  |
| V06C_12m | Infant formulas_12m                                    | No  |
| V06C_24m | Infant formulas_24m                                    | No  |

|          |                                               |    |
|----------|-----------------------------------------------|----|
| V06C_48m | Infant formulas_48m                           | No |
| V06D_6m  | Other nutrients_6m                            | No |
| V06D_12m | Other nutrients_12m                           | No |
| V06D_24m | Other nutrients_24m                           | No |
| V06D_48m | Other nutrients_48m                           | No |
| V07A_6m  | All other non-therapeutic products_6m         | No |
| V07A_12m | All other non-therapeutic products_12m        | No |
| V07A_24m | All other non-therapeutic products_24m        | No |
| V07A_48m | All other non-therapeutic products_48m        | No |
| V08A_6m  | X-ray contrast media, iodinated_6m            | No |
| V08A_12m | X-ray contrast media, iodinated_12m           | No |
| V08A_24m | X-ray contrast media, iodinated_24m           | No |
| V08A_48m | X-ray contrast media, iodinated_48m           | No |
| V08B_6m  | X-ray contrast media, non-iodinated_6m        | No |
| V08B_12m | X-ray contrast media, non-iodinated_12m       | No |
| V08B_24m | X-ray contrast media, non-iodinated_24m       | No |
| V08B_48m | X-ray contrast media, non-iodinated_48m       | No |
| V08C_6m  | Magnetic resonance imaging contrast media_6m  | No |
| V08C_12m | Magnetic resonance imaging contrast media_12m | No |
| V08C_24m | Magnetic resonance imaging contrast media_24m | No |
| V08C_48m | Magnetic resonance imaging contrast media_48m | No |
| V08D_6m  | Ultrasound contrast media_6m                  | No |
| V08D_12m | Ultrasound contrast media_12m                 | No |
| V08D_24m | Ultrasound contrast media_24m                 | No |
| V08D_48m | Ultrasound contrast media_48m                 | No |
| V09A_6m  | Central nervous system_6m                     | No |
| V09A_12m | Central nervous system_12m                    | No |
| V09A_24m | Central nervous system_24m                    | No |

|          |                                             |    |
|----------|---------------------------------------------|----|
| V09A_48m | Central nervous system_48m                  | No |
| V09B_6m  | Skeleton_6m                                 | No |
| V09B_12m | Skeleton_12m                                | No |
| V09B_24m | Skeleton_24m                                | No |
| V09B_48m | Skeleton_48m                                | No |
| V09C_6m  | Renal system_6m                             | No |
| V09C_12m | Renal system_12m                            | No |
| V09C_24m | Renal system_24m                            | No |
| V09C_48m | Renal system_48m                            | No |
| V09D_6m  | Hepatic and reticulo endothelial system_6m  | No |
| V09D_12m | Hepatic and reticulo endothelial system_12m | No |
| V09D_24m | Hepatic and reticulo endothelial system_24m | No |
| V09D_48m | Hepatic and reticulo endothelial system_48m | No |
| V09E_6m  | Respiratory system_6m                       | No |
| V09E_12m | Respiratory system_12m                      | No |
| V09E_24m | Respiratory system_24m                      | No |
| V09E_48m | Respiratory system_48m                      | No |
| V09F_6m  | Thyroid_6m                                  | No |
| V09F_12m | Thyroid_12m                                 | No |
| V09F_24m | Thyroid_24m                                 | No |
| V09F_48m | Thyroid_48m                                 | No |
| V09G_6m  | Cardiovascular system_6m                    | No |
| V09G_12m | Cardiovascular system_12m                   | No |
| V09G_24m | Cardiovascular system_24m                   | No |
| V09G_48m | Cardiovascular system_48m                   | No |
| V09H_6m  | Inflammation and infection detection_6m     | No |
| V09H_12m | Inflammation and infection detection_12m    | No |
| V09H_24m | Inflammation and infection detection_24m    | No |

|                       |                                            |     |
|-----------------------|--------------------------------------------|-----|
| V09H_48m              | Inflammation and infection detection_48m   | No  |
| V09I_6m               | Tumour detection_6m                        | No  |
| V09I_12m              | Tumour detection_12m                       | No  |
| V09I_24m              | Tumour detection_24m                       | No  |
| V09I_48m              | Tumour detection_48m                       | No  |
| V09X_6m               | Other diagnostic radiopharmaceuticals_6m   | No  |
| V09X_12m              | Other diagnostic radiopharmaceuticals_12m  | No  |
| V09X_24m              | Other diagnostic radiopharmaceuticals_24m  | No  |
| V09X_48m              | Other diagnostic radiopharmaceuticals_48m  | No  |
| V10A_6m               | Anti-inflammatory agents_6m                | No  |
| V10A_12m              | Anti-inflammatory agents_12m               | No  |
| V10A_24m              | Anti-inflammatory agents_24m               | No  |
| V10A_48m              | Anti-inflammatory agents_48m               | No  |
| V10B_6m               | Pain palliation (bone seeking agents)_6m   | No  |
| V10B_12m              | Pain palliation (bone seeking agents)_12m  | No  |
| V10B_24m              | Pain palliation (bone seeking agents)_24m  | No  |
| V10B_48m              | Pain palliation (bone seeking agents)_48m  | No  |
| V10X_6m               | Other therapeutic radiopharmaceuticals_6m  | No  |
| V10X_12m              | Other therapeutic radiopharmaceuticals_12m | No  |
| V10X_24m              | Other therapeutic radiopharmaceuticals_24m | No  |
| V10X_48m              | Other therapeutic radiopharmaceuticals_48m | No  |
| SEX                   | Sex                                        | No  |
| immigrant             | Immigration                                | Yes |
| DIVOR_WIDOW_SEPAR_6m  | Divorced_widowed_separated_6m              | Yes |
| DIVOR_WIDOW_SEPAR_12m | Divorced_widowed_separated_12m             | Yes |
| DIVOR_WIDOW_SEPAR_24m | Divorced_widowed_separated_24m             | Yes |



|                       |                                                                |     |
|-----------------------|----------------------------------------------------------------|-----|
| DIVOR_WIDOW_SEPAR_48m | Divorced_widowed_separated_48m                                 | Yes |
| MARRIED_PARTNER_6m    | Married_partner_6m                                             | Yes |
| MARRIED_PARTNER_12m   | Married_partner_12m                                            | Yes |
| MARRIED_PARTNER_24m   | Married_partner_24m                                            | Yes |
| MARRIED_PARTNER_48m   | Married_partner_48m                                            | Yes |
| REMAINEDSINGLE_6m     | Remained_single_6m                                             | Yes |
| REMAINEDSINGLE_12m    | Remained_single_12m                                            | Yes |
| REMAINEDSINGLE_24m    | Remained_single_24m                                            | Yes |
| REMAINEDSINGLE_48m    | Remained_single_48m                                            | Yes |
| FAMILYMEMBER_SD_6m    | Suicide death of a family member (mother/father/partner)_6m    | No  |
| FAMILYMEMBER_SD_12m   | Suicide death of a family member (mother/father/partner)_12m   | No  |
| FAMILYMEMBER_SD_24m   | Suicide death of a family member (mother/father/partner)_24m   | No  |
| FAMILYMEMBER_SD_48m   | Suicide death of a family member (mother/father/partner)_48m   | No  |
| FAMILYMEMBER_SA_6m    | Suicide attempt of a family member (mother/father/partner)_6m  | No  |
| FAMILYMEMBER_SA_12m   | Suicide attempt of a family member (mother/father/partner)_12m | No  |
| FAMILYMEMBER_SA_24m   | Suicide attempt of a family member (mother/father/partner)_24m | No  |
| FAMILYMEMBER_SA_48m   | Suicide attempt of a family member (mother/father/partner)_48m | No  |
| ageA30                | Age>30                                                         | Yes |
| ageA40                | Age>40                                                         | Yes |
| ageA50                | Age>50                                                         | Yes |
| ageA60                | Age>60                                                         | Yes |
| HI_24_6m              | Health insurance_psychiatry treatment_6m                       | No  |
| HI_24_12m             | Health insurance_psychiatry treatment_12m                      | No  |
| HI_24_24m             | Health insurance_psychiatry treatment_24m                      | No  |
| HI_24_48m             | Health insurance_psychiatry treatment_48m                      | No  |
| HI_26_6m              | Health insurance_child psychiatry treatment_6m                 | No  |
| HI_26_12m             | Health insurance_child psychiatry treatment_12m                | No  |

|                       |                                                 |     |
|-----------------------|-------------------------------------------------|-----|
| HI_26_24m             | Health insurance_child psychiatry treatment_24m | No  |
| HI_26_48m             | Health insurance_child psychiatry treatment_48m | No  |
| HI_63_6m              | Health insurance_psychological help_6m          | No  |
| HI_63_12m             | Health insurance_psychological help_12m         | No  |
| HI_63_24m             | Health insurance_psychological help_24m         | No  |
| HI_63_48m             | Health insurance_psychological help_48m         | No  |
| X60_X84_6m            | Suicide attempt_6m                              | Yes |
| X60_X84_12m           | Suicide attempt_12m                             | Yes |
| X60_X84_24m           | Suicide attempt_24m                             | Yes |
| X60_X84_48m           | Suicide attempt_48m                             | Yes |
| Income_Q2_Q1          | Income quartile 2 (ref. income quartile 1)      | Yes |
| Income_Q3_Q1          | Income quartile 3 (ref. income quartile 1)      | Yes |
| Income_Q4_Q1          | Income quartile 4 (ref. income quartile 1)      | Yes |
| Income_ageB14_Q1      | Age ≤14 years (ref. income quartile 1)          | Yes |
| Income_missing_Q1     | Missing income (ref. income quartile 1)         | Yes |
| Unemployed_Employed   | Unemployed (ref. employed)                      | Yes |
| EarlyRetir_Employed   | Early retirement (ref. employed)                | Yes |
| StatePension_Employed | State pension (ref. employed)                   | Yes |
| AgeB14_Employed       | Age ≤14 years (ref. employed)                   | Yes |
| Missing_Employed      | Missing employment status (ref. employed)       | Yes |
